# Supplementary material for: Mortality and cause of death in South Korean patients with Parkinson’s disease: a longitudinal follow-up study using a national sample cohort
Source: PubMed Central journal article supplement — BMJ Open. 2019 Sep 17;9(9):e029776. doi: 10.1136/bmjopen-2019-029776 (PMC6756321; doi:10.1136/bmjopen-2019-029776), 2019-09-17
Supplement: bmjopen-2019-029776.draft_revisions.pdf [file bmjopen-2019-029776.draft_revisions.pdf]

# BMJ Open

BMJ Open is committed to open peer review. As part of this commitment we make the peer review history of every article we publish publicly available.

When an article is published we post the peer reviewers' comments and the authors' responses online. We also post the versions of the paper that were used during peer review. These are the versions that the peer review comments apply to.

The versions of the paper that follow are the versions that were submitted during the peer review process. They are not the versions of record or the final published versions. They should not be cited or distributed as the published version of this manuscript.

BMJ Open is an open access journal and the full, final, typeset and author-corrected version of record of the manuscript is available on our site with no access controls, subscription charges or pay-per-view fees (<http://bmjopen.bmj.com>).

If you have any questions on BMJ Open's open peer review process please email [info.bmjopen@bmj.com](mailto:info.bmjopen@bmj.com)

# BMJ Open

## **Mortality and cause of death in Parkinson's disease patients: A longitudinal follow-up study using a national sample cohort**

|                               |                                                                                                                                                                     |
|-------------------------------|---------------------------------------------------------------------------------------------------------------------------------------------------------------------|
| Journal:                      | <i>BMJ Open</i>                                                                                                                                                     |
| Manuscript ID                 | bmjopen-2019-029776                                                                                                                                                 |
| Article Type:                 | Research                                                                                                                                                            |
| Date Submitted by the Author: | 11-Feb-2019                                                                                                                                                         |
| Complete List of Authors:     | Choi, Hyo Geun; Hallym University,<br>Lim, Jae-Sung<br>Sim, Songyong<br>Kim, Miyoung ; Department of Laboratory Medicine, Hallym University<br>College of Medicine, |
| Keywords:                     | Parkinson-s disease < NEUROLOGY, mortality, Korean                                                                                                                  |
|                               |                                                                                                                                                                     |

SCHOLARONE™  
Manuscripts

1  
2  
3  
4 1 **Mortality and cause of death in Parkinson's disease patients: A**  
5  
6  
7 2 **longitudinal follow-up study using a national sample cohort**  
8  
9  
10 3

11 4 Hyo Geun Choi, MD<sup>1,2</sup>, Jae-Sung Lim, MD<sup>3</sup>, Songyong Sim, PhD<sup>4\*</sup>, Miyoung Kim, MD<sup>5\*</sup>  
12  
13  
14 5

15  
16 6 <sup>1</sup>Hallym Data Science Laboratory, Hallym University College of Medicine, Anyang, Korea  
17

18 7 <sup>2</sup>Department of Otorhinolaryngology-Head & Neck Surgery, Hallym University College of  
19 8 Medicine, Anyang, Korea

20  
21 9 <sup>3</sup>Department of Neurology, Hallym University Sacred Heart Hospital, Anyang, Korea  
22

23 10 <sup>4</sup>Department of Statistics, Hallym University, Chuncheon, Korea  
24

25  
26 11 <sup>5</sup>Department of Laboratory Medicine, Hallym University College of Medicine, Anyang,  
27 12 Korea  
28  
29  
30  
31

32 13  
33  
34 14 Running title: Parkinson's disease and mortality  
35

36 15 Abstract word count: 234  
37

38  
39 16 Text word count: 3062  
40

41 17 Number of figures: 1  
42

43 18 Number of tables: 4  
44

45 19 Number of supplementary tables: 1  
46  
47  
48  
49 20

50 21 Key words: Parkinson's disease, mortality, Korean  
51  
52  
53 22

54  
55 23 \*These authors equally contributed in this study  
56  
57 24  
58  
59  
60

1  
2  
3 25 Correspondence:  
4

5 26 Miyoung Kim  
6

7  
8 27 Department of Laboratory Medicine, Hallym University Sacred Heart Hospital  
9

10 28 22, Gwanpyeong-ro 170beon-gil, Dongan-gu, Anyang-si, Gyeonggi-do, 14068, Republic of  
11

12 29 Korea  
13

14 30 Tel: 82-31-380-1795; Fax: 82-31-380-1798; Email: [rabbit790622@gmail.com](mailto:rabbit790622@gmail.com)  
15  
16

17 31

18  
19 32 Songyong Sim  
20

21 33 Department of Statistics, Hallym University,  
22

23 34 Hallymro 1, Chuncheon, Gangwon-do, 24252, Republic of Korea  
24  
25

26 35 Tel: 82-33-248-1000; Fax: 82-33-248-3333; Email: [sysim@hallym.ac.kr](mailto:sysim@hallym.ac.kr)  
27  
28  
29  
30  
31  
32  
33  
34  
35  
36  
37  
38  
39  
40  
41  
42  
43  
44  
45  
46  
47  
48  
49  
50  
51  
52  
53  
54  
55  
56  
57  
58  
59  
60

1  
2  
3  
4 36 **Mortality and cause of death in Parkinson's disease patient: A**  
5  
6  
7 37 **longitudinal follow-up study using a national sample cohort**  
8  
9  
10 38

11 39 **ABSTRACT**

12  
13  
14 40 *Objective:* The prevalence of Parkinson's disease (PD) is growing rapidly owing to the aging  
15  
16 41 population. We investigated the mortality rates and causes of death in South Korean patients  
17  
18 42 with PD.

19  
20  
21 43 *Design:* We investigated a national cohort using the nationwide insurance database.

22  
23 44 *Setting:* Korean Health Insurance Review and Assessment Service - National Sample Cohort.

24  
25 45 *Participants:* We included 4,169 participants  $\geq 60$  years of age who were diagnosed with PD  
26  
27 46 between 2002 and 2013, as well as 1,121,522 matched controls.

28  
29  
30 47 *Interventions:* None

31  
32 48 *Primary and secondary outcome measures:* A Cox proportional hazards model was used to  
33  
34 49 evaluate patients with PD who were matched 1:4 with non-PD control subjects adjusted for  
35  
36 50 age, sex, income, and region of residence. The causes of death were grouped into 12  
37  
38 51 classifications.

39  
40  
41 52 *Results:* The adjusted hazard ratio (HR) for mortality in the PD group was 2.26 (95%  
42  
43 53 confidence interval [CI] = 2.11–2.42,  $P < 0.001$ ). Subgroup analysis according to age (<75  
44  
45 54 years vs.  $\geq 75$  years) and sex revealed that patients with PD showed higher adjusted HRs for  
46  
47 55 mortality across all subgroups. Mortalities caused by metabolic, mental, neurologic, disease,  
48  
49 56 disease, and genitourinary diseases, as well as trauma, were more common in the PD group  
50  
51 57 than in the control group, with the highest odds ratio observed in patients with neurologic  
52  
53 58 disease.  
54  
55  
56  
57  
58  
59  
60

1  
2  
3 59 *Conclusions:* We demonstrated that PD in South Korean patients  $\geq 60$  years of age was  
4  
5 60 associated with increased mortality in both sexes regardless of age.  
6  
7  
8 61

9  
10 62 Key words: Parkinson's disease, mortality, Korean  
11  
12 63

#### 13 64 **Strengths and limitations of this study**

- 14  
15 65 • Our study dataset encompassed 1,125,691 subjects registered over a 12-year period in  
16  
17 66 a national insurance database.
- 18  
19 67 • The study encompassed all registered patients with PD who were treated at least  
20  
21 68 twice.
- 22  
23 69 • The patients were not restricted to only those who were hospitalized.
- 24  
25 70 • The patients with PD were matched 1:4 with control subjects based on age, group,  
26  
27 71 sex, income group, regions of residence, and the past medical histories.
- 28  
29 72 • We were unable to determine the severity of PD, and some confounding factors (e.g.,  
30  
31 73 smoking status, alcohol consumption, and obesity) were not adjusted for.  
32  
33  
34  
35  
36  
37  
38  
39  
40

#### 41 75 **INTRODUCTION**

42  
43 76 Parkinson's disease (PD) is the second most common neurodegenerative disorder, and is  
44  
45 77 characterized by the 4 cardinal motor signs: tremor at rest, bradykinesia, rigidity, and postural  
46  
47 78 instability, as well as other non-motor clinical manifestations [1, 2]. Despite the remarkable  
48  
49 79 symptom-relieving benefits provided by levodopa over the past 30 years, recent studies have  
50  
51 80 demonstrated that the mortality rates among PD patients remain higher than in individuals  
52  
53 81 without PD [3, 4]. PD is one of the fastest growing diseases in terms of prevalence, disability,  
54  
55 82 and mortality; the rapidly aging population has contributed to an increase in crude PD  
56  
57  
58  
59  
60

1  
2  
3 83 prevalence rates [5]. As such, a better understanding of the rates and causes of mortality in  
4  
5 84 patients with PD is important to better estimate the social burden and medical care costs [6].  
6

7  
8 85 Even though PD is associated with increased mortality in general, previous studies show  
9  
10 86 inconsistent data, with mortality rates ranging from 0.80 to 3.50 [2]. Some studies performed  
11  
12 87 in the post-levodopa era even reported “super-normal” survival rather than increased  
13  
14 88 mortality among PD patients [2]. Furthermore, the causes of death in patients with PD remain  
15  
16 89 unclear [7]. The heterogeneity observed in studies of mortality as related to PD could be  
17  
18 90 caused by the variable methodology and patient selection criteria. Different studies tend to be  
19  
20 91 hospital-, pharmaceutical trial- or community-based, and thus yield results that are not very  
21  
22 92 representative of the general population [6].  
23  
24

25  
26 93 According to Global Burden of Disease, Injuries, and Risk Factors Study of 2016, the  
27  
28 94 death rate, prevalence, and disability-adjusted life-years of patients with PD varied depending  
29  
30 95 on ethnicity and/or geography [5]. Among high-income Asia Pacific countries, South Korea  
31  
32 96 showed the highest percentage change in age-standardized mortality rates between 1990 and  
33  
34 97 2016 (24.6%) compared to Brunei (17.9%), Japan (10.2%), and Singapore (11.3%), even  
35  
36 98 though the percentage change in age-standardized rates of prevalence during the same time  
37  
38 99 period (21.0%) was similar to that of Japan (21.3%) [5]. Thus, analyses focused on a  
39  
40 100 particular ethnic/geographic group is important to estimate the social burden of PD and the  
41  
42 101 patient management plan in each country. However, a large cohort-based investigation of PD-  
43  
44 102 related mortality rates and causes of death in South Korea has never been performed.  
45  
46  
47  
48

49 103 To better understand the natural courses and prognoses of patients with PD, and to  
50  
51 104 provide valuable information on the planning the distribution of health resources, we  
52  
53 105 investigated the mortality rates and causes of death in patients with PD using a representative  
54  
55 106 PD population in South Korea. We performed a large-scale longitudinal follow-up study with  
56  
57 107 a maximum follow-up duration of 12 years, using national cohort data.  
58  
59  
60

108

## 109 MATERIALS AND METHODS

### 110 Study Population and Data Collection

111 The ethics committee of Hallym University (2014-I148) approved the use of these data.

112 Written informed consent was exempted by the Institutional Review Board.

113 This national cohort study relies on data from the Korean Health Insurance Review and  
114 Assessment Service - National Sample Cohort (HIRA-NSC). The Korean National Health  
115 Insurance Service (NHIS) selects samples directly from the entire population database to  
116 prevent non-sampling errors. Approximately 2% of the samples (one million) were selected  
117 from the entire Korean population (50 million). This selected data can be classified at 1,476  
118 levels (age [18 categories], sex [2 categories], and income level [41 categories]) using  
119 randomized stratified systematic sampling methods via proportional allocation to represent  
120 the entire population. After data selection, the appropriateness of the sample was verified by a  
121 statistician who compared the data from the entire Korean population to the sample data. The  
122 details of the methods used to perform these procedures are provided by the National Health  
123 Insurance Sharing Service [8]. This cohort database included (i) personal information, (ii)  
124 health insurance claim codes (procedures and prescriptions), (iii) diagnostic codes using the  
125 International Classification of Disease-10 (ICD-10), (iv) death records from the Korean  
126 National Statistical Office (using the Korean Standard Classification of disease), (v) socio-  
127 economic data (residence and income), and (vi) medical examination data for each participant  
128 over a period ranging from 2002 to 2013.

129 Because all Korean citizens are recognized by a 13-digit resident registration number  
130 from birth to death, exact population statistics can be determined using this database. It is  
131 mandatory for all Koreans to enroll in the NHIS. All Korean hospitals and clinics use the 13-  
132 digit resident registration number to register individual patients in the medical insurance



1  
2  
3 133 system. Therefore, the risk of overlapping medical records is minimal, even if a patient  
4  
5 134 moves from one place to another. Moreover, all medical treatments in Korea can be tracked  
6  
7  
8 135 without exception using the HIRA system. In Korea, notice of death to an administrative  
9  
10 136 entity is legally required before a funeral can be held. Causes of death and date are recorded  
11  
12 137 by medical doctors on a death certificate.  
13  
14  
15 138

### 17 139 **Participants Selection**

18  
19 140 Out of 1,125,691 cases with 114,369,638 medical claim codes, we included participants who  
20  
21 141 were diagnosed as PD from 2002 through 2013 (n = 4,169). PD was categorized using ICD-  
22  
23 142 10 codes (Parkinson's disease: G20). For the accuracy of diagnosis, we only selected if the  
24  
25  
26 143 participants were treated  $\geq 2$  times. The control participants were extracted from 1,121,522  
27  
28 144 participants who were never diagnosed PD from 2002 through 2013 among this cohort.

29  
30 145 The PD participants were matched 1:4 with control group. The matches were processed  
31  
32  
33 146 for age, group, sex, income group, region of residence, the past medical histories of  
34  
35 147 hypertension, diabetes mellitus, and dyslipidemia. To prevent selection bias when selecting  
36  
37 148 the matched participants, the control group participants were sorted using a random number  
38  
39 149 order, and they were then selected from top to bottom. It was assumed that the matched  
40  
41  
42 150 control participants were involved at the same time of each matched PD participants.  
43  
44 151 Therefore, the control group who died before the involvement time of the matched PD  
45  
46 152 participant was excluded. The PD participants for whom we could not identify enough  
47  
48 153 matching participants were excluded (n = 40). The participants who were diagnosed as PD  
49  
50 154 under 60 years old were excluded (n = 619) in that the prevalence of PD was relatively low  
51  
52  
53 155 under that ages [9]. Finally, 1:4 matching resulted in the inclusion of 3,510 of PD participants  
54  
55  
56 156 and 14,040 control participants (Fig. 1).  
57  
58  
59  
60

## 158 **Variables**

159 The age groups were classified using 5-year intervals: 60-64, 65-69, 70-74..., and 85+ years  
160 old. A total of 6 age groups were designated. The income groups were initially divided into  
161 41 classes (one health aid class, 20 self-employment health insurance classes, and 20  
162 employment health insurance classes). These groups were re-categorized into 11 classes  
163 (class 1 [lowest income]-11 [highest income]). Region of residence was divided into 16 areas  
164 according to administrative district. These regions were regrouped into urban (Seoul, Busan,  
165 Daegu, Incheon, Gwangju, Daejeon, and Ulsan) and rural (Gyeonggi, Gangwon,  
166 Chungcheongbuk, Chungcheongnam, Jeollabuk, Jeollanam, Gyeongsangbuk,  
167 Gyeongsangnam, and Jeju) areas.

168 Cause of death were classified following Korean standard classification of diseases  
169 (KCD), which was developed based on the International Statistical Classification of Diseases  
170 and Related Health Problems (ICD) by World Health Organization (WHO). Therefore, the  
171 causes of death were categorized by 12 classification and we added one (others), which had  
172 the limited the number of participants: (i) Infection (Certain infections and parasitic diseases,  
173 A00-B99); (ii) Neoplasm (Neoplasm, C00-D48); (iii) Metabolic disease (Endocrine,  
174 nutritional and metabolic diseases, E00-E90); (iv) Mental disease (Mental and behavioural  
175 disorders, F00-F99); (v) Neurologic disease (Diseases of the nervous system, G00-G99); (vi)  
176 Circulatory disease (Diseases of the circulatory system, I00-I99); (vii) Respiratory disease  
177 (Diseases of the respiratory system, J00-J99); (viii) Digestive disease (Diseases of the  
178 digestive system, K00-K93); (ix) Muscular disease (Diseases of the musculoskeletal system  
179 and connective tissue, M00-M99); (x) Genitourinary disease (Diseases of the genitourinary  
180 system, N00-N99); (xi) Abnormal finding (Symptoms, signs and abnormal clinical and  
181 laboratory findings, NEC, R00-R99); (xii) Trauma (Injury, poisoning and certain other  
182 consequences of external causes, S00-T98); (xiii) Others (Diseases of the blood and blood-

183 forming organs and certain disorders involving the immune mechanism, D50-D89; Diseases  
184 of the skin and subcutaneous tissue, L00-L99).

185 The past medical histories of participants were evaluated using ICD-10 codes. For the  
186 accuracy of diagnosis, hypertension (I10 and I15), diabetes (E10-E14), and hyperlipidemia  
187 (E78) were checked if the participants were treated  $\geq 2$  times.

188

### 189 **Statistical Analyses**

190 Chi-square test was used to compare the general characteristics of participants.

191 Chi-square test or Fisher's exact test was used to compare the rate of mortality between  
192 PD and control group according to cause of death. In this analysis, to adjust expected value of  
193 wrong declined null hypothesis, false discovery rate was used.

194 To analyze the hazard ratio (HR) of PD on mortality, Cox-proportional hazard model was  
195 used. In this analysis, crude (simple) and adjusted (age, sex, income, region of residence,  
196 hypertension, diabetes, and dyslipidemia) model was used. 95% confidence interval (CI)  
197 were calculated. Two-tailed analyses were conducted, and P values less than 0.05 were  
198 considered to indicate significance. The results were statistically analyzed using SPSS v. 21.0  
199 (IBM, Armonk, NY, USA).

200

### 201 **RESULTS**

202 The mean follow-up duration was 49.6 months (standard deviation [SD] = 37.3 months) in  
203 the PD group and 57.3 (SD = 40.6) months in the matched control group.

204 Age, sex, income level, region of residence, hypertension status, diabetes status, and  
205 dyslipidemia status were matched between the PD and control groups (Table 1). The  
206 mortality rate was significantly higher in the PD group than that in the control group (34.6%  
207 and 19.0%, respectively,  $P < 0.001$ ).

209 **Table 1** General Characteristics of Participants

| Characteristics | Total participants         |                |         |
|-----------------|----------------------------|----------------|---------|
|                 | Parkinson's disease (n, %) | Control (n, %) | P-value |
| Age (years old) |                            |                | 1.000   |
| 60-64           | 388 (11.1)                 | 1,552 (11.1)   |         |
| 65-69           | 660 (18.8)                 | 2,640 (18.8)   |         |
| 70-74           | 903 (25.7)                 | 3,612 (25.7)   |         |
| 75-79           | 835 (23.8)                 | 3,340 (23.8)   |         |
| 80-84           | 498 (14.2)                 | 1,992 (14.2)   |         |
| 85+             | 226 (6.4)                  | 904 (6.4)      |         |
| Sex             |                            |                | 1.000   |
| Male            | 1,336 (38.1)               | 5,344 (38.1)   |         |
| Female          | 2,174 (61.9)               | 8,696 (61.9)   |         |
| Income          |                            |                | 1.000   |
| 1 (lowest)      | 325 (9.3)                  | 1,300 (9.3)    |         |
| 2               | 283 (8.1)                  | 1,132 (8.1)    |         |
| 3               | 145 (4.1)                  | 580 (4.1)      |         |
| 4               | 154 (4.4)                  | 616 (4.4)      |         |
| 5               | 179 (5.1)                  | 716 (5.1)      |         |
| 6               | 190 (5.4)                  | 760 (5.4)      |         |
| 7               | 251 (7.2)                  | 1,004 (7.2)    |         |
| 8               | 256 (7.3)                  | 1,024 (7.3)    |         |
| 9               | 383 (10.9)                 | 1,532 (10.9)   |         |
| 10              | 584 (16.6)                 | 2,336 (16.6)   |         |
| 11 (highest)    | 760 (21.7)                 | 3,040 (21.7)   |         |

|                     |              |               |         |
|---------------------|--------------|---------------|---------|
| Region of residence |              |               | 1.000   |
| Urban               | 1,467 (41.8) | 5,868 (41.8)  |         |
| Rural               | 2,043 (58.2) | 8,172 (58.2)  |         |
| Hypertension        |              |               | 1.000   |
| Yes                 | 2,544 (72.5) | 10,176 (72.5) |         |
| No                  | 966 (27.5)   | 3,864 (27.5)  |         |
| Diabetes            |              |               | 1.000   |
| Yes                 | 1,386 (39.5) | 5,544 (39.5)  |         |
| No                  | 2,124 (60.5) | 8,496 (60.5)  |         |
| Dyslipidemia        |              |               | 1.000   |
| Yes                 | 1,185 (33.8) | 4,740 (33.8)  |         |
| No                  | 2,325 (66.2) | 9,300 (66.2)  |         |
| Death               |              |               | <0.001* |
| Yes                 | 1,214 (34.6) | 2,661 (19.0)  |         |
| No                  | 2,296 (65.4) | 11,379 (81.0) |         |

210

211 \*Chi-square test or Fisher's exact test. Significance at  $P < 0.05$ 

212

213 The crude and adjusted HRs for mortality in the PD group were 2.14 (95% CI = 2.00–2.29,

214  $P < 0.001$ ) and 2.26 (95% CI = 2.11–2.42,  $P < 0.001$ ), respectively (Table 2). When215 categorizing patients according to age (<75 years vs.  $\geq 75$  years) and sex, PD patients in all

216 the subgroups showed higher crude and adjusted HRs for mortality than did the control

217 patients (Table 3). The crude and adjusted HRs were significantly higher in PD patients  $\geq 75$ 

218 years of age than in those &lt;75 years regardless of sex. Moreover, the crude and adjusted HRs

219 trended slightly higher in women than in men regardless of age; however, the 95% CIs

220 overlapped.

222 **Table 2** Crude and adjusted hazard ratios (95% confidence interval) of Parkinson's disease  
 223 for mortality

| Characteristics     | Hazard ratio (95% CI) |          |                  |          |
|---------------------|-----------------------|----------|------------------|----------|
|                     | Crude                 | P-value  | Adjusted†        | P-value  |
| Parkinson's disease |                       | < 0.001* |                  | < 0.001* |
| Yes                 | 2.14 (2.00-2.29)      |          | 2.26 (2.11-2.42) |          |
| No                  | 1.00                  |          | 1.00             |          |

224  
 225 \*Cox-proportional hazard regression model, Significance at P < 0.05

226 †Adjusted model for age, sex, income, region of residence, hypertension, diabetes, and  
 227 dyslipidemia

228

229 **Table 3** Subgroup analysis of crude and adjusted hazard ratios (95% confidence interval) of  
 230 Parkinson's disease for mortality according to age

| Characteristics                       | Hazard ratio (95% CI) |          |                  |          |
|---------------------------------------|-----------------------|----------|------------------|----------|
|                                       | Crude                 | P-value  | Adjusted†        | P-value  |
| Age < 75 years old, men (n = 3,895)   |                       |          |                  |          |
| Parkinson's disease                   |                       | < 0.001* |                  | < 0.001* |
| Yes                                   | 2.59 (2.24-2.98)      |          | 2.66 (2.31-3.06) |          |
| No                                    | 1.00                  |          | 1.00             |          |
| Age < 75 years old, women (n = 5,860) |                       |          |                  |          |
| Parkinson's disease                   |                       | < 0.001* |                  | < 0.001* |
| Yes                                   | 3.26 (2.80-3.81)      |          | 3.37 (2.88-3.93) |          |
| No                                    | 1.00                  |          | 1.00             |          |
| Age ≥ 75 years old, men (n = 2,785)   |                       |          |                  |          |
| Parkinson's disease                   |                       | < 0.001* |                  | < 0.001* |
| Yes                                   | 1.73 (1.50-1.99)      |          | 1.77 (1.54-2.03) |          |
| No                                    | 1.00                  |          | 1.00             |          |
| Age ≥ 75 years old, women (n = 5,010) |                       |          |                  |          |
| Parkinson's disease                   |                       | < 0.001* |                  | < 0.001* |
| Yes                                   | 1.89 (1.68-2.13)      |          | 1.96 (1.74-2.20) |          |
| No                                    | 1.00                  |          | 1.00             |          |

231

232 \*Cox-proportional hazard regression model, Significance at P < 0.05

233 †Adjusted model for age, sex, income, region of residence, hypertension, diabetes, and  
 234 dyslipidemia

235

236 Analysis of mortality rates according to the cause of death revealed an odds ratio (OR) for  
 237 overall mortality of 2.26 (95% CI = 2.08–2.45,  $P < 0.001$ ) in the PD group (Table 4); the  
 238 detailed data are presented in Supplementary Table 1. Mortalities caused by metabolic  
 239 disease, mental diseases, neurologic disease, circulatory disease, respiratory disease,  
 240 genitourinary disease and trauma were higher in the PD group than in the control group (the  
 241 false discovery rate-adjusted  $P$ -value was  $<0.05$  for each). The OR for mortality was highest  
 242 for neurologic disease (20.87, 95% CI = 16.05–27.14,  $P < 0.001$ ); among these neurologic  
 243 diseases, extrapyramidal and movement disorders were the most common (294/328, 89.6%).  
 244 Mortalities caused by infection, neoplasm, digestive disease, muscular disease, and other  
 245 causes were not significantly different between the PD and control groups.

247 **Table 4** The difference of mortality rate between Parkinson's disease and control group  
 248 according to cause of death

| Cause of death             | Total participants                 |                         |                     |            |
|----------------------------|------------------------------------|-------------------------|---------------------|------------|
|                            | Parkinson's disease<br>(n = 3,510) | Control<br>(n = 14,040) | Odd ratio (95% CI)  | P-value    |
| All of death (n, %)        | 1214 (34.6)                        | 2661 (19.0)             | 2.26 (2.08-2.45)    | $<0.001^*$ |
| Infection (n, %)           | 23 (0.7)                           | 74 (0.5)                | 1.25 (0.78-1.99)    | 0.375      |
| Neoplasm (n, %)            | 151 (4.3)                          | 667 (4.8)               | 0.90 (0.75-1.08)    | 0.283      |
| Metabolic Disease (n, %)   | 76 (2.2)                           | 161 (1.1)               | 1.91 (1.45-2.51)    | $<0.001^*$ |
| Mental diseases (n, %)     | 33 (0.9)                           | 49 (0.3)                | 2.71 (1.74-4.22)    | $<0.001^*$ |
| Neurologic disease (n, %)  | 328 (9.3)                          | 69 (0.5)                | 20.87 (16.05-27.14) | $<0.001^*$ |
| Circulatory disease (n, %) | 277 (7.9)                          | 705 (5.0)               | 1.62 (1.40-1.87)    | $<0.001^*$ |
| Respiratory disease (n, %) | 97 (2.8)                           | 248 (1.8)               | 1.58 (1.25-2.01)    | $<0.001^*$ |
| Digestive disease (n, %)   | 30 (0.9)                           | 88 (0.6)                | 1.37 (0.90-2.07)    | 0.139      |
| Muscular disease (n, %)    | 8 (0.2)                            | 15 (0.1)                | 2.14 (0.91-5.04)    | 0.076      |



|                              |           |           |                  |        |
|------------------------------|-----------|-----------|------------------|--------|
| Genitourinary disease (n, %) | 25 (0.7)  | 50 (0.4)  | 2.01 (1.24-3.25) | 0.004* |
| Trauma (n, %)                | 64 (1.8)  | 154 (1.1) | 1.68 (1.25-2.25) | 0.001* |
| Others (n, %)                | 102 (2.9) | 381 (2.7) | 1.07 (0.86-1.34) | 0.533  |

249

250 \* Chi-square test or Fisher's exact test. Significance at false discovery rate adjusted  $P < 0.05$

251 CI: confidence interval

252

253

## 254 DISCUSSION

255 Our findings were consistent with those of previous studies, most of which found higher  
 256 mortality rates in patients with PD with HRs ranging from 1.2 to 2.4 [10, 11]. However, most  
 257 such studies were performed in Western countries, and data from Asian patients have rarely  
 258 been reported. A recent study in China found that the standardized mortality rate of patients  
 259 with PD was 0.62 (95% CI = 0.32–1.07), implying that the 5-year mortality ratio of patients  
 260 with PD was not significantly higher than that of the general urban Chinese population [2].

261 However, we cannot compare their results to ours given their different study design; the  
 262 Chinese study comprised 157 PD patients who were referred to - or diagnosed at - a particular  
 263 tertiary hospital. To our knowledge, ours is the first study to demonstrate that mortality rates  
 264 are higher in Korean PD patients using a national cohort, and is also the largest study of its  
 265 kind to date. The adjusted HR of our study (2.26) was relatively higher than in previous  
 266 studies considering that most reported HRs fall between 1.2 and 2.4, however, this is of little  
 267 relevance owing to the major heterogeneity among the study methodologies. Nevertheless,  
 268 our data still show that the mortality of patients with PD is higher than that in control  
 269 populations despite recent advances in the treatment of this disease. This indicates that, while  
 270 current treatment modalities relieve motor symptoms, they do not necessarily improve  
 271 mortality rates and/or the life expectancies of patients with PD.

1  
2  
3 272 The adjusted HRs for mortality were significantly higher in patients  $\geq 75$  years of age at  
4  
5 273 the time of PD diagnosis than in those  $< 75$  years when diagnosed in both men and women.  
6  
7 274 Older age at onset was most consistently found to be an independent predictor of mortality  
8  
9 275 across studies [4, 12-17]. One study by Morgan et al. produced a contrasting result in that  
10  
11 276 patients with early PD onset (of ages 50 years or younger) appeared to have higher mortality  
12  
13 277 rates than patients with later PD onset [3]; however, we could not compare our results to  
14  
15 278 theirs because we excluded subjects younger than 60 years. While it is unclear why the age of  
16  
17 279 onset affects the mortality rate in the PD patients, a possible explanation is that patients aged  
18  
19 280  $\geq 75$  years at onset may be affected by mortality-causing conditions that were not adjusted for  
20  
21  
22 281 in our study to a greater extent than those  $< 75$  years.

23  
24  
25 282 As we did not make a direct comparison between men and women in subgroup analysis,  
26  
27 283 we were unable to ascertain whether sex is a factor affecting the mortality rates of patients  
28  
29 284 with PD. While some studies have found that male sex was associated with increased  
30  
31 285 mortality in patients with PD [12-17], others showed this not to be the case [3, 18]. More  
32  
33 286 recent data suggest that, because the general life expectancy of women in general is longer  
34  
35 287 than that of men, the formers' higher mortality rates and greater reductions in lifespan are  
36  
37 288 more apparent when they are afflicted with PD; this would imply that PD progression  
38  
39 289 patterns are not actually different between the sexes with respect to mortality [3].

40  
41  
42 290 In our study, patients with PD died more frequently of certain diseases and of trauma  
43  
44 291 than their counterparts in the control population. Neurologic diseases (particularly  
45  
46 292 extrapyramidal and movement disorders) were the most common causes of death, implying  
47  
48 293 that PD features themselves were most responsible for death among PD patients in South  
49  
50 294 Korea. Such studies of the outcomes of PD patients are scarce. In a study of mortality among  
51  
52 295 211 levodopa-treated patients with PD in the United Kingdom, Morgan et al. showed that the  
53  
54 296 most common cause of death was PD itself (52.6%) [3]. They interpreted this to indicate that,  
55  
56  
57  
58  
59  
60

1  
2  
3 297 even though levodopa might improve motor symptoms such as tremor, bradykinesia, and  
4  
5 298 rigidity, it did not slow disease progression [19]. As the PD progressed, levodopa-resistant  
6  
7 299 motor symptoms (speech/swallowing impairment, gait, and balance problems) and nonmotor  
8  
9 300 symptoms (autonomic dysfunction, mood disorders, cognitive impairment, sleep disorders,  
10  
11 301 and psychosis) become more prevalent and may contribute to the increased morbidity and  
12  
13 302 mortality [20]. Although our study cohort was not necessarily confined to levodopa-treated  
14  
15 303 subjects, it is highly likely that a significant proportion of our patients might have been  
16  
17 304 treated by levodopa, as we only selected patients who were treated  $\geq 2$  times for PD. Our  
18  
19 305 findings are different from those of other groups that found pneumonia to be the most  
20  
21 306 common cause of death in PD patients [21-24]. The most likely explanation for this  
22  
23 307 difference could be the varying methods of patient recruitment: we recruited our subjects  
24  
25 308 based on their PD treatment history regardless of whether they were hospitalized; therefore,  
26  
27 309 the cause of death among our patients; i.e., neurologic disease that may have included PD  
28  
29 310 itself, may also reflect patients having died of other (perhaps natural) causes while afflicted  
30  
31 311 with PD. However, the causes of death in hospitalized or nursing home-bound PD patients  
32  
33 312 may have had a greater likelihood of being reported as pneumonia because of their orthostatic  
34  
35 313 lability. Furthermore, our indication that PD-group patients did not necessarily die of  
36  
37 314 pneumonia is true insofar as being compared to the control group, and is not a general  
38  
39 315 statement, since we calculated the ORs of the cause of mortality. The significance of other  
40  
41 316 causes of death such as cancer and circulation-impeding ischemic heart disease remain  
42  
43 317 controversial [1, 2, 21-25]; the ORs for these conditions were not significant in our study.  
44  
45 318 Nevertheless, our most important findings include (i) the overall death rate was higher in the  
46  
47 319 PD group than that in the control group, and (ii) metabolic disease, mental diseases,  
48  
49 320 neurologic disease, circulatory disease, respiratory disease, genitourinary disease, and trauma  
50  
51  
52  
53  
54  
55  
56  
57  
58  
59  
60

1  
2  
3 321 are common causes of death in PD patients in addition to PD itself. Our findings ought to be  
4  
5 322 valuable for PD patient caregivers in both hospital and community settings.  
6  
7

8 323 A limitation of our study was that we were unable to determine the severity of PD. In the  
9  
10 324 same context, we did not stratify patients by their hospitalization histories or disease  
11  
12 325 durations, which may have skewed the mortality data. Furthermore, some confounding  
13  
14 326 factors that can influence mortality, such as smoking status, alcohol consumption, and  
15  
16 327 obesity, were not adjusted for [26-28].  
17  
18

19 328 Despite these limitations, our data are nevertheless robust because we used a  
20  
21 329 representative, large-scale sample from a cohort database comprising over 1 million subjects  
22  
23 330 over a 12-year follow-up period. Another strength of our study is that our approach  
24  
25 331 minimized the risk of recall bias or missing information, as the dataset was based on claims  
26  
27 332 to the compulsory HIRA nationwide health insurance system. We chose matched controls  
28  
29 333 adjusted for the potential confounding factors of age, sex, income, and region of residence.  
30  
31 334 Our subjects' comorbidity data were consistent with those of previous epidemiologic studies  
32  
33 335 in the Korean population, which was further evidence of our study's reliability [29, 30].  
34  
35  
36  
37  
38  
39

## 40 337 **CONCLUSION**

41  
42 338 We performed the largest study on the risk of mortality in South Korean PD patients  
43  
44 339 with clearly defined inclusion criteria. We found that PD increased the risk of mortality  
45  
46 340 regardless of age and sex. The mortality rate was higher in patients  $\geq 75$  years old than in  
47  
48 341 those  $< 75$  years for both sexes. Common causes of death in patients with PD included  
49  
50 342 metabolic, mental, neurologic, circulatory, respiratory, and genitourinary diseases as well as  
51  
52 343 trauma; the highest OR observed was for neurologic disease.  
53  
54  
55  
56  
57  
58  
59  
60

1  
2  
3 345 **Acknowledgments**  
4

5 346 This work was supported in part by a research grant (NRF-2015-R1D1A1A01060860) from  
6  
7 347 the National Research Foundation (NRF) of Korea.  
8  
9

10 348

11  
12 349 **Conflict of Interest**  
13

14 350 The authors do not have any conflict of interest to disclose.  
15  
16

17 351

18  
19 352 **Author contributions:**  
20

21 353 Choi HG composed the manuscript, Lim JS provided neurologist's perspective, and Sim S  
22  
23 354 and Kim M designed and supervised the study.  
24  
25

26 355  
27  
28  
29  
30  
31  
32  
33  
34  
35  
36  
37  
38  
39  
40  
41  
42  
43  
44  
45  
46  
47  
48  
49  
50  
51  
52  
53  
54  
55  
56  
57  
58  
59  
60

356 **REFERENC**

- 357 1. Doi Y, Yokoyama T, Nakamura Y, Nagai M, Fujimoto K, Nakano I. How can the  
358 national burden of Parkinson's disease comorbidity and mortality be estimated for the  
359 Japanese population? *J Epidemiol.* 2011;21(3):211-6.
- 360 2. Wang G, Li XJ, Hu YS, Cheng Q, Wang CF, Xiao Q, Liu J, Ma JF, Zhou HY, Pan J, Tan  
361 YY, Wang Y, Chen SD. Mortality from Parkinson's disease in China: Findings from a  
362 five-year follow up study in Shanghai. *Can J Neurol Sci.* 2015 Jul;42(4):242-7.
- 363 3. Morgan JC, Currie LJ, Harrison MB, Bennett JP Jr, Trugman JM, Wooten GF. Mortality  
364 in levodopa-treated Parkinson's disease. *Parkinsons Dis.* 2014;2014:426976.
- 365 4. CLarke CE. Mortality from Parkinson's disease. *J Neurol Neurosurg Psychiatry.* 2000  
366 Feb;68(2):254-5.
- 367 5. GBD 2016 Parkinson's Disease Collaborators. Global, regional, and national burden of  
368 Parkinson's disease, 1990-2016: a systematic analysis for the Global Burden of Disease  
369 Study 2016. *Lancet Neurol.* 2018 Nov;17(11):939-953.
- 370 6. de Lau LM, Schipper CM, Hofman A, Koudstaal PJ, Breteler MM. Prognosis of  
371 Parkinson disease: risk of dementia and mortality: the Rotterdam Study. *Arch Neurol.*  
372 2005 Aug;62(8):1265-9.
- 373 7. Pennington S, Snell K, Lee M, Walker R. The cause of death in idiopathic Parkinson's  
374 disease. *Parkinsonism Relat Disord.* 2010 Aug;16(7):434-7.
- 375 8. The National Health Insurance Sharing Service of Korea. 2014. Available at:  
376 <https://nhiss.nhis.or.kr/bd/ab/bdaba022eng.do>. Accessed November 1, 2018.
- 377 9. Driver JA, Logroscino G, Gaziano JM, Kurth T. Incidence and remaining lifetime risk of  
378 Parkinson disease in advanced age. *Neurology.* 2009 Feb 3;72(5):432-8.

- 1  
2  
3 379 10. Ishihara LS, Cheesbrough A, Brayne C, Schrag A. Estimated life expectancy of  
4  
5 380 Parkinson's patients compared with the UK population. *J Neurol Neurosurg Psychiatry*.  
6  
7 381 2007 Dec;78(12):1304-9.  
8  
9  
10 382 11. Macleod AD, Taylor KS, Counsell CE. Mortality in Parkinson's disease: a systematic  
11  
12 383 review and meta-analysis. *Mov Disord*. 2014 Nov;29(13):1615-22.  
13  
14 384 12. Rajput AH, Uitti RJ, Rajput AH, Offord KP. Timely levodopa (LD) administration  
15  
16 385 prolongs survival in Parkinson's disease. *Parkinsonism Relat Disord*. 1997 Nov;3(3):159-  
17  
18 386 65.  
19  
20  
21 387 13. DerSimonian R, Laird N. Meta-analysis in clinical trials. *Controlled Clinical Trials*.  
22  
23 388 1986;7:177-188.  
24  
25  
26 389 14. Rybicki BA, Johnson CC, Gorell JM. Demographic differences in referral rates to  
27  
28 390 neurologists of patients with suspected Parkinson's disease: implications for case-control  
29  
30 391 study design. *Neuroepidemiology*. 1995;14:72-81.  
31  
32  
33 392 15. Herlofson K, Lie SA, Arslan D, Larsen JP. Mortality and Parkinson disease: A  
34  
35 393 community based study. *Neurology*. 2004 Mar 23;62(6):937-42.  
36  
37  
38 394 16. Goldman DA, Brender JD. Are standardized mortality ratios valid for public health data  
39  
40 395 analysis? *Stat Med*. 2000;19:1081-1088.  
41  
42 396 17. Higgins JP, Thompson SG, Spiegelhalter DJ. A re-evaluation of random-effects meta-  
43  
44 397 analysis. *J R Stat Soc Series A*. 2009;172:137-159.  
45  
46  
47 398 18. Wooten GF, Currie LJ, Bovbjerg VE, Lee JK, Patrie J. Are men at greater risk for  
48  
49 399 Parkinson's disease than women? *J Neurol Neurosurg Psychiatry*. 2004 Apr;75(4):637-9.  
50  
51 400 19. Olanow CW. The scientific basis for the current treatment of Parkinson's disease. *Annu*  
52  
53 401 *Rev Med*. 2004;55:41-60.  
54  
55  
56  
57  
58  
59  
60

- 1  
2  
3 402 20. Rascol O, Payoux P, Ory F, Ferreira JJ, Brefel-Courbon C, Montastruc JL. Limitations of  
4  
5 403 current Parkinson's disease therapy. *Ann Neurol*. 2003;53 Suppl 3:S3-12; discussion S12-  
6  
7 404 5.
- 8  
9  
10 405 21. Hobson P, Meara J. Mortality and quality of death certification in a cohort of patients  
11  
12 406 with Parkinson's disease and matched controls in North Wales, UK at 18 years: a  
13  
14 407 community-based cohort study. *BMJ Open*. 2018 Feb 14;8(2):e018969.
- 15  
16  
17 408 22. D'Amelio M, Ragonese P, Morgante L, Reggio A, Callari G, Salemi G, Savettieri G.  
18  
19 409 Long-term survival of Parkinson's disease: a population-based study. *J Neurol*. 2006  
20  
21 410 Jan;253(1):33-7.
- 22  
23  
24 411 23. Fall PA, Saleh A, Fredrickson M, Olsson JE, Granérus AK. Survival time, mortality, and  
25  
26 412 cause of death in elderly patients with Parkinson's disease: a 9-year follow-up. *Mov*  
27  
28 413 *Disord*. 2003 Nov;18(11):1312-6.
- 29  
30  
31 414 24. Beyer MK, Herlofson K, Aarsland D, Larsen JP. Causes of death in a community based  
32  
33 415 study of Parkinson's disease. *Acta Neurol Scand*. 2001;103:7e11.
- 34  
35  
36 416 25. Ben-Shlomo Y, Marmot MG. Survival and cause of death in a cohort of patients with  
37  
38 417 parkinsonism: possible clues to aetiology? *J Neurol Neurosurg Psychiatr*.  
39  
40 418 1995;58(3):293e9.
- 41  
42  
43 419 26. Ma C, Liu Y, Neumann S, Gao X. Nicotine from cigarette smoking and diet and  
44  
45 420 Parkinson disease: a review. *Transl Neurodegener*. 2017 Jul 2;6:18.
- 46  
47  
48 421 27. Bettiol SS, Rose TC, Hughes CJ, Smith LA. Alcohol Consumption and Parkinson's  
49  
50 422 Disease Risk: A Review of Recent Findings. *J Parkinsons Dis*. 2015;5(3):425-42.
- 51  
52 423 28. Chen J, Guan Z, Wang L, Song G, Ma B, Wang Y. Meta-analysis: overweight, obesity,  
53  
54 424 and Parkinson's disease. *Int J Endocrinol*. 2014;2014:203930.
- 55  
56 425 29. Kim DJ. The epidemiology of diabetes in Korea. *Diabetes Metab J* 2011;35:303-8.  
57  
58  
59  
60



1  
2  
3 426 **30.** Lee HY, Park JB. The Korean Society of Hypertension Guidelines for the Management  
4  
5 427 of hypertension in 2013: Its essentials and key points. Pulse (Basel) 2015;3:21-8.  
6  
7  
8  
9  
10  
11  
12  
13  
14  
15  
16  
17  
18  
19  
20  
21  
22  
23  
24  
25  
26  
27  
28  
29  
30  
31  
32  
33  
34  
35  
36  
37  
38  
39  
40  
41  
42  
43  
44  
45  
46  
47  
48  
49  
50  
51  
52  
53  
54  
55  
56  
57  
58  
59  
60

For peer review only

428 **Figure legend**

429 **Fig. 1** A schematic illustration of the participant selection process that was used in the present  
430 study. Out of a total of 1,125,691 participants, 4,169 PD participants were selected. The PD  
431 participants were matched 1:4 with a control group that were not diagnosed as PD. Finally,  
432 3,510 PD and 14,040 control participants were included.

433

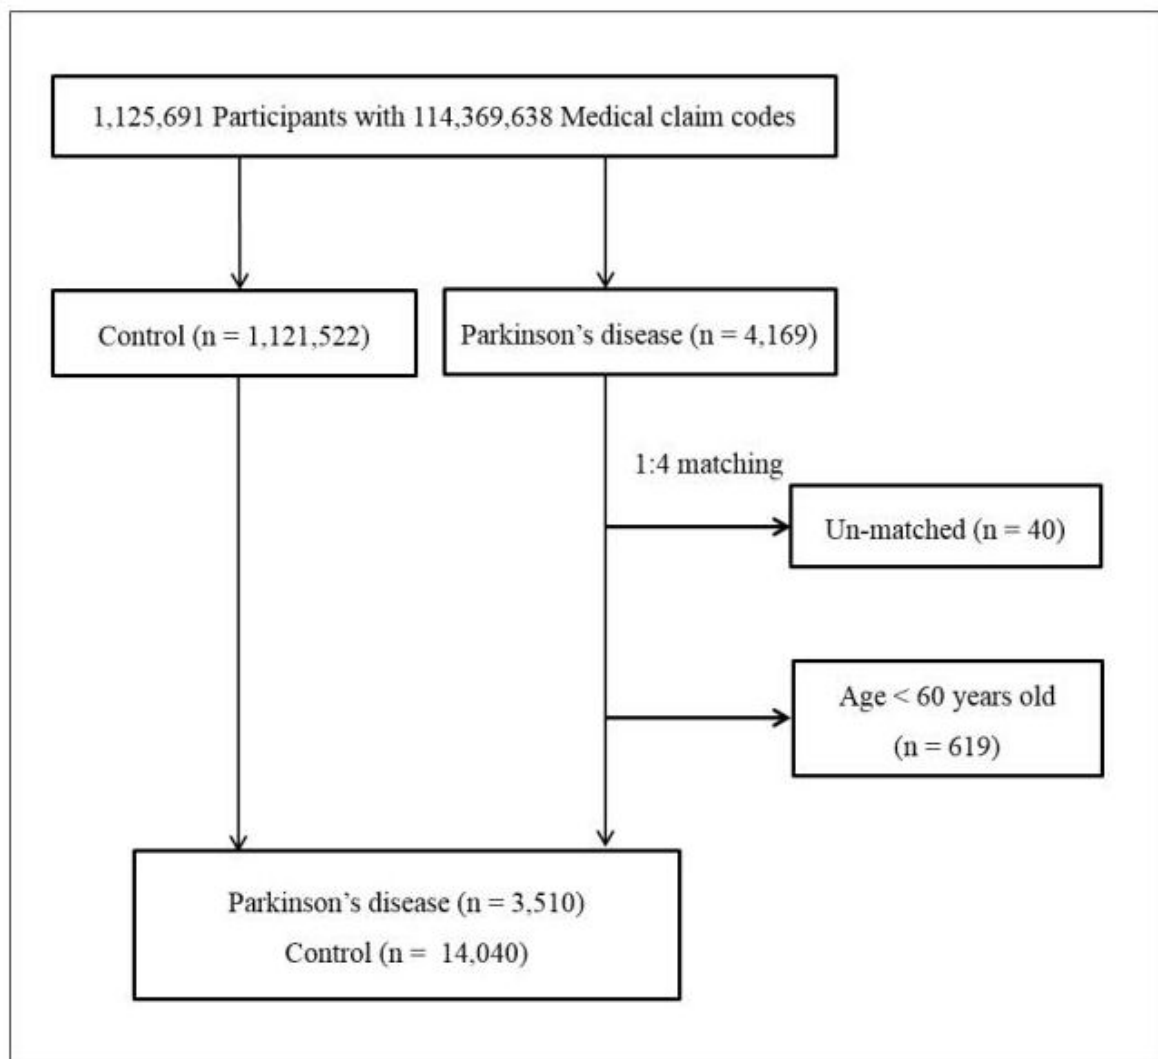

434

435

**S1Table** Cause of death in Parkinson's disease and control groups

| Cause of death                                                             | Codes    | Total participants       |                         |
|----------------------------------------------------------------------------|----------|--------------------------|-------------------------|
|                                                                            |          | Parkinson<br>(n = 3,510) | Control<br>(n = 14,040) |
| <b>Infection</b>                                                           | A00-B99  |                          |                         |
| Intestinal Infectious Diseases                                             | A00-A09  | 6                        | 9                       |
| Tuberculosis                                                               | A15-A19  | 3                        | 25                      |
| Certain Zoonotic Bacterial diseases                                        | A20-A28  | 0                        | 0                       |
| Other bacterial diseases                                                   | A30- A49 | 13                       | 26                      |
| Infections with a predominantly sexual mode of transmission                | A50-A64  | 0                        | 0                       |
| Other spirochaetal diseases                                                | A65-A69  | 0                        | 0                       |
| Other diseases caused by chlamydiae                                        | A70-A74  | 0                        | 0                       |
| Rickettsioses                                                              | A75-A79  | 0                        | 2                       |
| Viral infections of the central nervous system                             | A80-A89  | 0                        | 0                       |
| Arthropod-borne viral fevers and viral hemorrhagic fevers                  | A92-A99  | 0                        | 0                       |
| Viral infections characterized by skin and mucous membrane lesions         | B00-B09  | 0                        | 2                       |
| Viral hepatitis                                                            | B15-B19  | 1                        | 9                       |
| Human immunodeficiency virus[HIV] disease                                  | B20-B24  | 0                        | 0                       |
| Other viral diseases                                                       | B25-B34  | 0                        | 0                       |
| Mycoses                                                                    | B35-B49  | 0                        | 0                       |
| Protozoal diseases                                                         | B50-B64  | 0                        | 0                       |
| Helminthiasis                                                              | B65-B83  | 0                        | 0                       |
| Pediculosis, acariasis and other infestations                              | B85-B89  | 0                        | 0                       |
| Sequelae of infectious and parasitic diseases                              | B90-B94  | 0                        | 1                       |
| Bacterial, viral and other infectious agents                               | B95-B98  | 0                        | 0                       |
| Other infectious diseases                                                  | B99      | 0                        | 0                       |
| <b>Neoplasm</b>                                                            | C00-D48  |                          |                         |
| Malignant neoplasm of lip, oral cavity and pharynx                         | C00-C14  | 5                        | 5                       |
| Malignant neoplasms of digestive organs                                    | C15-C26  | 67                       | 366                     |
| Malignant neoplasms of respiratory and intrathoracic organs                | C30-C39  | 28                       | 158                     |
| Malignant neoplasm of bone and articular cartilage                         | C40-C41  | 1                        | 2                       |
| Melanoma and other malignant neoplasms of skin                             | C43-C44  | 1                        | 1                       |
| Malignant neoplasms of mesothelial and soft tissue                         | C45-C49  | 1                        | 5                       |
| Malignant neoplasm of breast                                               | C50      | 2                        | 3                       |
| Malignant neoplasm of female genital organs                                | C51-C58  | 8                        | 11                      |
| Malignant neoplasm of male genital organs                                  | C60-C63  | 4                        | 29                      |
| Malignant neoplasm of urinary tract                                        | C64-C68  | 4                        | 28                      |
| Malignant neoplasm of eye, brain and other parts of central nervous system | C69-C72  | 1                        | 6                       |
| Malignant neoplasm of thyroid and other endocrine gland                    | C73-C75  | 3                        | 5                       |
| Malignant neoplasm of ill-defined, secondary and unspecified sites         | C76-C80  | 8                        | 11                      |
| Malignant neoplasms of lymphoid, hematopoietic and related tissue          | C81-C96  | 10                       | 26                      |
| Malignant neoplasm of independent (primary) multiple sites                 | C97      | 1                        | 2                       |
| In situ neoplasms                                                          | D00-D09  | 0                        | 1                       |

|    |                                                                         |         |     |     |
|----|-------------------------------------------------------------------------|---------|-----|-----|
| 1  |                                                                         |         |     |     |
| 2  |                                                                         |         |     |     |
| 3  |                                                                         |         |     |     |
| 4  | Benign neoplasms                                                        | D10-D36 | 1   | 2   |
| 5  | Neoplasms of uncertain or unknown behaviour                             | D37-D48 | 6   | 6   |
| 6  |                                                                         |         |     |     |
| 7  | <b>Metabolic disease</b>                                                | E00-E90 |     |     |
| 8  | Disorders of thyroid gland                                              | E00-E07 | 1   | 0   |
| 9  | Diabetes mellitus                                                       | E10-E14 | 71  | 154 |
| 10 |                                                                         |         |     |     |
| 11 | Other disorders of glucose regulation and pancreatic internal secretion | E15-E16 | 0   | 0   |
| 12 | Disorders of other endocrine glands                                     | E20-E35 | 2   | 0   |
| 13 | Malnutrition                                                            | E40-E46 | 0   | 1   |
| 14 | Other nutritional deficiencies                                          | E50-E64 | 1   | 0   |
| 15 | Obesity and other hyperalimentation                                     | E65-E68 | 0   | 0   |
| 16 | Metabolic disorders                                                     | E70-E90 | 1   | 6   |
| 17 |                                                                         |         |     |     |
| 18 | <b>Mental disease</b>                                                   | F00-F99 |     |     |
| 19 |                                                                         |         |     |     |
| 20 | Organic, including symptomatic                                          | F00-F09 | 29  | 46  |
| 21 | mental disorders                                                        | F10-F19 | 2   | 3   |
| 22 | Mental and behavioral disorders                                         | F20-F29 | 2   | 0   |
| 23 | due to psychoactive substance use                                       | F30-F39 | 0   | 0   |
| 24 | Schizophrenia, schizotypal and                                          | F40-F48 | 0   | 0   |
| 25 | delusional disorders                                                    | F50-F59 | 0   | 0   |
| 26 | Mood[affective] disorders                                               | F60-F69 | 0   | 0   |
| 27 | Neurotic, stress-related and                                            | F70-F79 | 0   | 0   |
| 28 | somatoform disorders                                                    | F80-F89 | 0   | 0   |
| 29 | Behavioral syndromes associated                                         | F90-F98 | 0   | 0   |
| 30 | with physiological disturbances and                                     | F99     | 0   | 0   |
| 31 |                                                                         |         |     |     |
| 32 |                                                                         |         |     |     |
| 33 |                                                                         |         |     |     |
| 34 | <b>Neurologic disease</b>                                               | G00-G99 |     |     |
| 35 | Inflammatory diseases of the central nervous system                     | G00-G09 | 1   | 1   |
| 36 | Systemic atrophies primarily affecting the central nervous system       | G10-G14 | 4   | 3   |
| 37 | Extrapyramidal and movement disorders                                   | G20-G26 | 294 | 7   |
| 38 | Other degenerative diseases of the nervous system                       | G30-G32 | 22  | 51  |
| 39 | Demyelinating diseases of the central nervous system                    | G35-G37 | 0   | 0   |
| 40 | Episodic and paroxysmal disorders                                       | G40-G47 | 1   | 4   |
| 41 | Nerve, nerve root and plexus disorders                                  | G50-G59 | 0   | 0   |
| 42 | Polyneuropathies and other disorders of the peripheral nervous system   | G60-G64 | 0   | 1   |
| 43 | Diseases of myoneural junction and muscle                               | G70-G73 | 0   | 0   |
| 44 | Cerebral palsy and other paralytic syndromes                            | G80-G83 | 1   | 1   |
| 45 | Other disorders of the nervous system                                   | G90-G99 | 5   | 1   |
| 46 |                                                                         |         |     |     |
| 47 |                                                                         |         |     |     |
| 48 |                                                                         |         |     |     |
| 49 | <b>Circulatory disease</b>                                              | I00-I99 |     |     |
| 50 |                                                                         |         |     |     |
| 51 | Acute rheumatic fever                                                   | I00-I02 | 0   | 0   |
| 52 | Chronic rheumatic heart diseases                                        | I05-I09 | 0   | 3   |
| 53 | Hypertensive diseases                                                   | I10-I15 | 31  | 75  |
| 54 | Ischemic heart diseases                                                 | I20-I25 | 54  | 148 |
| 55 | Pulmonary heart disease and diseases of pulmonary circulation           | I26-I28 | 1   | 5   |
| 56 | Other forms of heart disease                                            | I30-I52 | 39  | 102 |
| 57 | Cerebrovascular diseases                                                | I60-I69 | 150 | 359 |
| 58 |                                                                         |         |     |     |
| 59 | Diseases of arteries, arterioles and capillaries                        | I70-I79 | 2   | 13  |
| 60 |                                                                         |         |     |     |

1  
2  
3  
4  
5  
6  
7  
8  
9  
10  
11  
12  
13  
14  
15  
16  
17  
18  
19  
20  
21  
22  
23  
24  
25  
26  
27  
28  
29  
30  
31  
32  
33  
34  
35  
36  
37  
38  
39  
40  
41  
42  
43  
44  
45  
46  
47  
48  
49  
50  
51  
52  
53  
54  
55  
56  
57  
58  
59  
60

|                                                                     |         |    |     |
|---------------------------------------------------------------------|---------|----|-----|
| Diseases of veins, lymphatic vessels and lymph nodes, NEC           | I80-I89 | 0  | 0   |
| Other and unspecified disorders of the circulatory system           | I95-I99 | 0  | 0   |
| <b>Respiratory disease</b>                                          | J00-J99 |    |     |
| Acute upper respiratory infections                                  | J00-J06 | 0  | 0   |
| Influenza and pneumonia                                             | J09-J18 | 48 | 105 |
| Other acute lower respiratory infections                            | J20-J22 | 0  | 0   |
| Other diseases of upper respiratory tract                           | J30-J39 | 0  | 0   |
| Chronic lower respiratory diseases                                  | J40-J47 | 31 | 106 |
| Lung diseases due to external agents                                | J60-J70 | 13 | 20  |
| Other respiratory diseases principally affecting the interstitium   | J80-J84 | 3  | 11  |
| Suppurative and necrotic conditions of lower respiratory tract      | J85-J86 | 1  | 1   |
| Other diseases of pleura                                            | J90-J94 | 0  | 0   |
| Other diseases of the respiratory system                            | J95-J99 | 1  | 5   |
| <b>Digestive disease</b>                                            | K00-K93 |    |     |
| Diseases of oral cavity, salivary glands and jaws                   | K00-K14 | 0  | 0   |
| Diseases of oesophagus, stomach and duodenum                        | K20-K31 | 3  | 12  |
| Disease of appendix                                                 | K35-K38 | 0  | 0   |
| Hernia                                                              | K40-K46 | 0  | 0   |
| Noninfective enteritis and colitis                                  | K50-K52 | 1  | 0   |
| Other diseases of intestines                                        | K55-K64 | 7  | 12  |
| Diseases of peritoneum                                              | K65-K67 | 0  | 2   |
| Diseases of liver                                                   | K70-K77 | 10 | 35  |
| Disorders of gallbladder, biliary tract and pancreas                | K80-K87 | 4  | 21  |
| Other diseases of the digestive system                              | K90-K93 | 5  | 6   |
| <b>Muscular disease</b>                                             | M00-M99 |    |     |
| Infectious arthropathies                                            | M00-M03 | 0  | 0   |
| Inflammatory polyarthropathies                                      | M05-M14 | 2  | 3   |
| Arthrosis                                                           | M15-M19 | 0  | 0   |
| Other joint disorders                                               | M20-M25 | 0  | 0   |
| Systemic connective tissue disorder                                 | M30-M36 | 0  | 1   |
| Deformin dorsopathies                                               | M40-M43 | 0  | 0   |
| Spondylopathies                                                     | M45-M49 | 1  | 0   |
| Other dorsopathies                                                  | M50-M54 | 0  | 1   |
| Disorders of muscles                                                | M60-M63 | 0  | 2   |
| Disorders of synovium and tendon                                    | M65-M68 | 0  | 0   |
| Other soft tissue disorders                                         | M70-M79 | 0  | 1   |
| Disorders of bone density and structure                             | M80-M85 | 5  | 6   |
| Other osteopathies                                                  | M86-M90 | 0  | 1   |
| Chondropathies                                                      | M91-M94 | 0  | 0   |
| Other disorders of the musculoskeletal system and connective tissue | M95-M99 | 0  | 0   |
| <b>Genitourinary disease</b>                                        | N00-N99 |    |     |
| Glomerular diseases                                                 | N00-N08 | 0  | 0   |
| Renal tubulo-interstitial diseases                                  | N10-N16 | 2  | 4   |
| Renal failure                                                       | N17-N19 | 18 | 38  |

|    |                                                                                |         |    |     |
|----|--------------------------------------------------------------------------------|---------|----|-----|
| 1  |                                                                                |         |    |     |
| 2  |                                                                                |         |    |     |
| 3  |                                                                                |         |    |     |
| 4  | Urolithiasis                                                                   | N20-N23 | 1  | 0   |
| 5  | Other disorders of kidney and ureter                                           | N25-N29 | 0  | 0   |
| 6  | Other diseases of the urinary system                                           | N30-N39 | 4  | 5   |
| 7  | Diseases of male genital organs                                                | N40-N51 | 0  | 3   |
| 8  | Disorders of breast                                                            | N60-N64 | 0  | 0   |
| 9  | Inflammatory diseases of female pelvic organs                                  | N70-N77 | 0  | 0   |
| 10 | Noninflammatory disorders of female genital tract                              | N80-N98 | 0  | 0   |
| 11 | Other disorders of the genitourinary system                                    | N99     | 0  | 0   |
| 12 |                                                                                |         |    |     |
| 13 |                                                                                |         |    |     |
| 14 | <b>Abnormal finding</b>                                                        | R00-R99 |    |     |
| 15 |                                                                                |         |    |     |
| 16 | Symptoms and signs involving the circulatory and respiratory systems           | R00-R09 | 9  | 15  |
| 17 | Symptoms and signs involving the digestive system and abdomen                  | R10-R19 | 0  | 0   |
| 18 | Symptoms and signs involving the skin and subcutaneous tissue                  | R20-R23 | 0  | 0   |
| 19 | symptoms and signs involving the nervous and musculoskeletal systems           | R25-R29 | 0  | 0   |
| 20 | symptoms and signs involving the urinary system                                | R30-R39 | 0  | 0   |
| 21 | Symptoms and signs involving cognition, perception, emotional state and        |         |    |     |
| 22 | behaviour                                                                      | R40-R46 | 0  | 0   |
| 23 | Symptoms and signs involving speech and voice                                  | R47-R49 | 0  | 0   |
| 24 | General symptoms and signs                                                     | R50-R69 | 71 | 266 |
| 25 | Abnormal findings on examination of blood, without diagnosis                   | R70-R79 | 0  | 0   |
| 26 | Abnormal findings on examination of urine, without diagnosis                   | R80-R82 | 0  | 0   |
| 27 | Abnormal findings on examination of other body fluids, substances and tissues, |         |    |     |
| 28 | without diagnosis                                                              | R83-R89 | 0  | 0   |
| 29 | Abnormal findings on diagnostic imaging and in function studies, without       |         |    |     |
| 30 | diagnosis                                                                      | R90-R94 | 0  | 0   |
| 31 | Ill-defined and unknown causes of mortality                                    | R95-R99 | 5  | 48  |
| 32 |                                                                                |         |    |     |
| 33 | <b>Trauma</b>                                                                  | S00-T98 |    |     |
| 34 |                                                                                |         |    |     |
| 35 | Injuries to the head                                                           | S00-S09 | 10 | 32  |
| 36 | Injuries to the neck                                                           | S10-S19 | 0  | 1   |
| 37 | Injuries to the thorax                                                         | S20-S29 | 2  | 12  |
| 38 | Injuries to the abdomen, lower back, lumbar spine and pelvis                   | S30-S39 | 0  | 3   |
| 39 | Injuries to the shoulder and upper arm                                         | S40-S49 | 0  | 1   |
| 40 | Injuries to the elbow and forearm                                              | S50-S59 | 1  | 0   |
| 41 | Injuries to the wrist and hand                                                 | S60-S69 | 0  | 0   |
| 42 | Injuries to the hip and thigh                                                  | S70-S79 | 7  | 16  |
| 43 | Injuries to the knee and lower leg                                             | S80-S89 | 0  | 2   |
| 44 | Injuries to the ankle and foot                                                 | S90-S99 | 0  | 0   |
| 45 | Injuries involving multiple body regions                                       | T00-T07 | 7  | 17  |
| 46 | Injuries to unspecified part of trunk, limb or body region                     | T08-T14 | 3  | 8   |
| 47 | Effects of foreign body entering through natural orifice                       | T15-T19 | 6  | 2   |
| 48 | Burns and corrosions of external body surface, specified by site               | T20-T25 | 0  | 0   |
| 49 | Burn and corrosions confined to eye and internal organs                        | T26-T28 | 0  | 1   |
| 50 | Burns and corrosions of multiple and unspecified of multiple and unspecified   |         |    |     |
| 51 | body regions                                                                   | T29-T32 | 2  | 0   |
| 52 | Frostbite                                                                      | T33-T35 | 0  | 0   |
| 53 |                                                                                |         |    |     |
| 54 |                                                                                |         |    |     |
| 55 |                                                                                |         |    |     |
| 56 |                                                                                |         |    |     |
| 57 |                                                                                |         |    |     |
| 58 |                                                                                |         |    |     |
| 59 |                                                                                |         |    |     |
| 60 |                                                                                |         |    |     |

|    |                                                                                |          |    |    |
|----|--------------------------------------------------------------------------------|----------|----|----|
| 1  |                                                                                |          |    |    |
| 2  |                                                                                |          |    |    |
| 3  |                                                                                |          |    |    |
| 4  | Poisoning by drugs, medicaments and biological substances                      | T36-T50  | 1  | 1  |
| 5  | Toxic effects of sustances chiefly nonmedicinal as to source                   | T51-T65  | 6  | 23 |
| 6  | Other and unspecified effects of external causes                               | T66-T78  | 18 | 33 |
| 7  | Certain early complications of trauma                                          | T79      | 0  | 0  |
| 8  | Complications of surgical and medical care, NEC                                | T80-T88  | 1  | 0  |
| 9  | Sequelae of injures, of poisoning and of other consequences of external causes | T90-T98  | 0  | 2  |
| 10 |                                                                                | D50-D89, |    |    |
| 11 |                                                                                | L00-L99  |    |    |
| 12 | <b>Others</b>                                                                  |          |    |    |
| 13 | Nutritional anemias                                                            | D50-D53  | 0  | 0  |
| 14 | Hemolytic anemias                                                              | D55-D59  | 0  | 0  |
| 15 | Aplastic and other anemias                                                     | D60-D64  | 1  | 3  |
| 16 | Coagulation defect, purpura and other hemorrhage conditions                    | D65-D69  | 1  | 0  |
| 17 | Other disease of blood and blood-forming organs                                | D70-D77  | 1  | 3  |
| 18 | Certain disorders involving the immune mechanism                               | D80-D89  | 0  | 2  |
| 19 | Other disorders of the skin and subcutaneous tissue                            | L80-L99  | 2  | 1  |
| 20 | missing                                                                        |          | 12 | 2  |
| 21 |                                                                                |          |    |    |
| 22 |                                                                                |          |    |    |
| 23 |                                                                                |          |    |    |
| 24 |                                                                                |          |    |    |
| 25 |                                                                                |          |    |    |
| 26 |                                                                                |          |    |    |
| 27 |                                                                                |          |    |    |
| 28 |                                                                                |          |    |    |
| 29 |                                                                                |          |    |    |
| 30 |                                                                                |          |    |    |
| 31 |                                                                                |          |    |    |
| 32 |                                                                                |          |    |    |
| 33 |                                                                                |          |    |    |
| 34 |                                                                                |          |    |    |
| 35 |                                                                                |          |    |    |
| 36 |                                                                                |          |    |    |
| 37 |                                                                                |          |    |    |
| 38 |                                                                                |          |    |    |
| 39 |                                                                                |          |    |    |
| 40 |                                                                                |          |    |    |
| 41 |                                                                                |          |    |    |
| 42 |                                                                                |          |    |    |
| 43 |                                                                                |          |    |    |
| 44 |                                                                                |          |    |    |
| 45 |                                                                                |          |    |    |
| 46 |                                                                                |          |    |    |
| 47 |                                                                                |          |    |    |
| 48 |                                                                                |          |    |    |
| 49 |                                                                                |          |    |    |
| 50 |                                                                                |          |    |    |
| 51 |                                                                                |          |    |    |
| 52 |                                                                                |          |    |    |
| 53 |                                                                                |          |    |    |
| 54 |                                                                                |          |    |    |
| 55 |                                                                                |          |    |    |
| 56 |                                                                                |          |    |    |
| 57 |                                                                                |          |    |    |
| 58 |                                                                                |          |    |    |
| 59 |                                                                                |          |    |    |
| 60 |                                                                                |          |    |    |

# BMJ Open

## Mortality and cause of death in South Korean patients with Parkinson's disease: A longitudinal follow-up study using a national sample cohort

|                                 |                                                                                                                                                                                         |
|---------------------------------|-----------------------------------------------------------------------------------------------------------------------------------------------------------------------------------------|
| Journal:                        | <i>BMJ Open</i>                                                                                                                                                                         |
| Manuscript ID                   | bmjopen-2019-029776.R1                                                                                                                                                                  |
| Article Type:                   | Original research                                                                                                                                                                       |
| Date Submitted by the Author:   | 29-Apr-2019                                                                                                                                                                             |
| Complete List of Authors:       | Choi, Hyo Geun; Hallym University,<br>Lim, Jae-Sung<br>Lee, Young Kyung<br>Sim, Songyong<br>Kim, Miyoung ; Department of Laboratory Medicine, Hallym University<br>College of Medicine, |
| <b>Primary Subject Heading</b>: | Epidemiology                                                                                                                                                                            |
| Secondary Subject Heading:      | Neurology                                                                                                                                                                               |
| Keywords:                       | Parkinson-s disease < NEUROLOGY, mortality, Korean                                                                                                                                      |
|                                 |                                                                                                                                                                                         |

SCHOLARONE™  
Manuscripts



1  
2  
3 **1 Mortality and cause of death in South Korean patients with Parkinson's disease: A**  
4  
5 **2 longitudinal follow-up study using a national sample cohort**  
6  
7  
8  
9

10 4 Hyo Geun Choi, MD, PhD<sup>1,2</sup>, Jae-Sung Lim, MD<sup>3</sup>, Young Kyung Lee, MD, PhD<sup>4</sup>, Songyong  
11  
12 5 Sim, PhD<sup>5\*</sup>, Miyoung Kim, MD, PhD<sup>4\*</sup>  
13  
14  
15  
16

17 7 <sup>1</sup>Hallym Data Science Laboratory, Hallym University College of Medicine, Anyang, Korea

18 8 <sup>2</sup>Department of Otorhinolaryngology-Head & Neck Surgery, Hallym University College of  
19  
20  
21 9 Medicine, Anyang, Korea

22 10 <sup>3</sup>Department of Neurology, Hallym University Sacred Heart Hospital, Anyang, Korea

23  
24 11 <sup>4</sup>Department of Laboratory Medicine, Hallym University College of Medicine, Anyang,  
25  
26  
27 12 Korea

28  
29  
30 13 <sup>5</sup>Department of Statistics, Hallym University, Chuncheon, Korea  
31  
32

33  
34  
35 15 Running title: Parkinson's disease and mortality

36  
37 16 Abstract word count: 240

38  
39 17 Text word count: 3251

40  
41 18 Number of figures: 1

42  
43 19 Number of tables: 3

44  
45  
46 20 Number of supplementary tables: 1  
47  
48

49  
50 21  
51 22 Key words: Parkinson's disease, mortality, Korean

52  
53  
54 23  
55  
56 24 \*These authors equally contributed in this study  
57  
58  
59  
60

1  
2  
3 26 Correspondence:  
4

5 27 Miyoung Kim  
6

7  
8 28 Department of Laboratory Medicine, Hallym University Sacred Heart Hospital  
9

10 29 22, Gwanpyeong-ro 170beon-gil, Dongan-gu, Anyang-si, Gyeonggi-do, 14068, Republic of  
11

12 30 Korea  
13

14  
15 31 Tel: 82-31-380-1795; Fax: 82-31-380-1798; Email: [rabbit790622@gmail.com](mailto:rabbit790622@gmail.com)  
16

17 32  
18

19 33 Songyong Sim  
20

21 34 Department of Statistics, Hallym University,  
22

23  
24 35 Hallymro 1, Chuncheon, Gangwon-do, 24252, Republic of Korea  
25

26 36 Tel: 82-33-248-1000; Fax: 82-33-248-3333; Email: [sysim@hallym.ac.kr](mailto:sysim@hallym.ac.kr)  
27  
28  
29  
30  
31  
32  
33  
34  
35  
36  
37  
38  
39  
40  
41  
42  
43  
44  
45  
46  
47  
48  
49  
50  
51  
52  
53  
54  
55  
56  
57  
58  
59  
60

1  
2  
3 37 **Mortality and cause of death in South Korean patients with Parkinson's disease: A**  
4  
5 38 **longitudinal follow-up study using a national sample cohort**  
6  
7  
8 39

9  
10 40 **ABSTRACT**  
11

12 41 *Objective:* The incidence rate of Parkinson's disease (PD) is growing rapidly owing to the  
13  
14 42 aging population. We investigated the mortality rates and causes of death in South Korean  
15  
16  
17 43 patients with PD.

18  
19 44 *Design:* We investigated a national cohort using the nationwide insurance database.  
20

21 45 *Setting:* Korean Health Insurance Review and Assessment Service - National Sample Cohort.  
22

23  
24 46 *Participants:* We included 3,510 participants  $\geq 60$  years of age who were diagnosed with PD  
25  
26 47 between 2002 and 2013, as well as 14,040 matched controls.  
27

28 48 *Interventions:* None  
29

30  
31 49 *Primary and secondary outcome measures:* A stratified Cox proportional hazards model was  
32  
33 50 used to evaluate patients with PD who were matched 1:4 with non-PD control subjects  
34  
35 51 adjusted for age, sex, income, and region of residence. The causes of death were grouped into  
36  
37 52 12 classifications.  
38

39  
40 53 *Results:* The adjusted hazard ratio (HR) for mortality in the PD group was 2.09 (95%  
41  
42 54 confidence interval [CI] = 1.94–2.24,  $P < 0.001$ ). Subgroup analysis according to age (<70  
43  
44 55 years, 70–79 years, and  $\geq 80$  years) and sex revealed that patients with PD showed higher  
45  
46 56 adjusted HRs for mortality across all subgroups. Mortalities caused by metabolic, mental,  
47  
48 57 neurologic, circulatory, respiratory, and genitourinary diseases, as well as trauma, were more  
49  
50 58 common in the PD group than in the control group, with the highest odds ratio observed in  
51  
52 59 patients with neurologic disease.  
53

54  
55  
56 60 *Conclusions:* We demonstrated that PD in South Korean patients  $\geq 60$  years of age was  
57  
58 61 associated with increased mortality in both sexes regardless of age.  
59  
60

1  
2  
3 62  
4  
5  
6 63

Key words: Parkinson's disease, mortality, Korean

7  
8 64  
9

### 65 **Strengths and limitations of this study**

- 66 • Our study dataset encompassed 1,125,691 subjects registered over a 12-year period in  
67 a national insurance database.
- 68 • The study encompassed all registered patients with PD who visited outpatient clinics,  
69 were hospitalized, or both at least twice.
- 70 • The patients were not restricted to only those who were hospitalized.
- 71 • The patients with PD were matched 1:4 with control subjects based on age, group, sex,  
72 income group, regions of residence, and the past medical histories.
- 73 • We were unable to determine the severity of PD, and some confounding factors (e.g.,  
74 smoking status, alcohol consumption, and obesity) were not adjusted for.

75

## 76 **INTRODUCTION**

77 Parkinson's disease (PD) is the second most common neurodegenerative disorder, and is  
78 characterized by the 4 cardinal motor signs: tremor at rest, bradykinesia, rigidity, and postural  
79 instability, as well as other non-motor clinical manifestations [1, 2]. Despite the remarkable  
80 symptom-relieving benefits provided by levodopa over the past 30 years, recent studies have  
81 demonstrated that the mortality rates among PD patients remain higher than in individuals  
82 without PD [3, 4]. PD is one of the fastest growing diseases in terms of prevalence, disability,  
83 and mortality; the rapidly aging population has contributed to an increase in crude PD  
84 prevalence rates [5]. As such, a better understanding of the rates and causes of mortality in  
85 patients with PD is important to better estimate the social burden and medical care costs [6].

1  
2  
3 86 Even though PD is associated with increased mortality in general, previous studies show  
4  
5 87 inconsistent data, with mortality rates ranging from 0.80 to 3.50 [2]. Some studies performed  
6  
7 88 in the post-levodopa era even reported “super-normal” survival rather than increased  
8  
9  
10 89 mortality among PD patients [2]. Furthermore, the causes of death in patients with PD remain  
11  
12 90 unclear [7]. The heterogeneity observed in studies of mortality as related to PD could be  
13  
14 91 caused by the variable methodology and patient selection criteria. Different studies tend to be  
15  
16 92 hospital-, pharmaceutical trial- or community-based, and thus yield results that are not very  
17  
18 93 representative of the general population [6].

21 94 According to the Global Burden of Disease, Injuries, and Risk Factors Study of 2016,  
22  
23 95 the death rate, prevalence, and disability-adjusted life-years of patients with PD varied  
24  
25 96 depending on ethnicity and/or geography [5]. Among high-income Asia Pacific countries,  
26  
27 97 South Korea showed the highest percentage change in age-standardized mortality rates  
28  
29 98 between 1990 and 2016 (24.6%) compared to Brunei (17.9%), Japan (10.2%), and Singapore  
30  
31 99 (11.3%), even though the percentage change in the age-standardized rates of prevalence  
32  
33 100 during the same time period (21.0%) was similar to that of Japan (21.3%) [5]. Thus, analyses  
34  
35 101 focused on a particular ethnic/geographic group is important to estimate the social burden of  
36  
37 102 PD and the patient management plan in each country. However, a large cohort-based  
38  
39 103 investigation of PD-related mortality rates and causes of death in South Korea has never been  
40  
41 104 performed.

46 105 To better understand the natural courses and prognoses of patients with PD, and to  
47  
48 106 provide valuable information on planning the distribution of health resources, we investigated  
49  
50 107 the mortality rates and causes of death in patients with PD using a representative PD  
51  
52 108 population in South Korea. We performed a large-scale longitudinal follow-up study, with a  
53  
54 109 maximum follow-up duration of 12 years, using national cohort data.

57  
58 110  
59  
60

1  
2  
3 111 **MATERIALS AND METHODS**  
4

5 112 **Patient and Public Involvement**  
6

7  
8 113 No patient involved.  
9

10 114

11  
12 115 **Study Population and Data Collection**  
13

14 116 The ethics committee of Hallym University approved the use of these data (approval number  
15 117 2014-I148). The requirement for written informed consent was waived by the Institutional  
16 118 Review Board.  
17  
18

19  
20  
21 119 This national cohort study relied on data from the Korean Health Insurance Review and  
22 120 Assessment Service (HIRA) National Sample Cohort. The Korean National Health Insurance  
23 121 Service (NHIS) selects samples directly from the entire population database to prevent non-  
24 122 sampling errors. Approximately 2% of the samples (1 million) were selected from the entire  
25 123 Korean population (50 million). These selected data were classified into 1,476 levels (age [18  
26 124 categories], sex [2 categories], and income level [41 categories]) using randomized stratified  
27 125 systematic sampling methods via proportional allocation to represent the entire population.  
28 126 After data selection, the appropriateness of the sample was verified by a statistician who  
29 127 compared the data from the entire Korean population to the sample data. The details of the  
30 128 methods used to perform these procedures are provided by the National Health Insurance  
31 129 Sharing Service [8]. The cohort database included (i) personal information, (ii) health  
32 130 insurance claim codes (procedures and prescriptions), (iii) diagnostic codes using the  
33 131 International Classification of Disease, 10<sup>th</sup> edition (ICD-10), (iv) death records from the  
34 132 Korean National Statistical Office (using the Korean Standard Classification of Disease), (v)  
35 133 socio-economic data (residence and income), and (vi) medical examination data for each  
36 134 participant over a period ranging from 2002 to 2013.  
37  
38  
39  
40  
41  
42  
43  
44  
45  
46  
47  
48  
49  
50  
51  
52  
53  
54  
55  
56  
57  
58  
59  
60

1  
2  
3 135 Because all Korean citizens are recognized by a 13-digit resident registration number  
4  
5 136 from birth to death, exact population statistics can be determined using this database. It is  
6  
7 137 mandatory for all Koreans to enroll in the NHIS. All Korean hospitals and clinics use the 13-  
8  
9 138 digit resident registration number to record individual patients in the medical insurance  
10  
11 139 system. Therefore, the risk of overlapping medical records is minimal, even if a patient  
12  
13 140 relocates to another geographical region. Moreover, all medical treatments in Korea can be  
14  
15 141 tracked without exception using the HIRA system. In Korea, a notice of death must legally be  
16  
17 142 delivered to an administrative entity before a funeral can be held. Causes and dates of death  
18  
19 143 are recorded by medical doctors on death certificates.  
20  
21  
22  
23

24 144

### 25 26 145 **Participant Selection**

27  
28 146 From among 1,125,691 individuals with 114,369,638 medical claim codes, we included  
29  
30 147 participants who were diagnosed with PD between 2002 and 2013 ( $n = 4,169$ ). PD was  
31  
32 148 categorized using ICD-10 codes (Parkinson's disease: G20). For accurate diagnoses, we only  
33  
34 149 selected participants who visited outpatient clinics, were hospitalized, or both at least twice  
35  
36 150 because of PD. The control participants were extracted from 1,121,522 participants who had  
37  
38 151 no diagnoses of PD between 2002 and 2013.  
39  
40  
41

42 152 Participants with PD were matched 1:4 with the control group. The matches were  
43  
44 153 adjusted for age group, sex, income, region of residence, and medical histories of  
45  
46 154 hypertension, diabetes mellitus, and dyslipidemia. We set the index date as that of the  
47  
48 155 diagnosis of PD in the PD group; participants from the control group were also followed from  
49  
50 156 the same index date as their matched counterparts with PD. To prevent selection bias,  
51  
52 157 participants in the control group were sorted using a random number, and were then selected  
53  
54 158 in descending order. It was assumed that the matched control participants were involved at  
55  
56 159 the same time of each matched PD participant; therefore, participants in the control group  
57  
58  
59  
60

1  
2  
3 160 who died before the time of involvement of the matched PD participant were excluded. Forty  
4  
5 161 PD participants for whom we could not identify a sufficient number of matching participants  
6  
7  
8 162 were also excluded, as were 619 participants who were diagnosed with PD while under the  
9  
10 163 age of 60 years since the prevalence of PD is relatively low in younger individuals [9].  
11  
12 164 Ultimately 3,510 PD participants matched 1:4 with 14,040 control participants were included  
13  
14  
15 165 (Fig. 1).  
16

166

### 167 **Variables**

168 Age groups were classified by 5-year intervals into 6 age groups: 60–64, 65–69, 70–74, 75–  
169 79, 80–84, and 85+ years old. The income groups were initially divided into 41 classes (1  
170 health aid class, 20 self-employment health insurance classes, and 20 employment health  
171 insurance classes). These groups were re-categorized into 11 classes (class 1 [lowest income]  
172 to class 11 [highest income]). Regions of residence were divided into 16 areas according to  
173 the administrative district. These regions were regrouped into urban (Seoul, Busan, Daegu,  
174 Incheon, Gwangju, Daejeon, and Ulsan) and rural (Gyeonggi, Gangwon, Chungcheongbuk,  
175 Chungcheongnam, Jeollabuk, Jeollanam, Gyeongsangbuk, Gyeongsangnam, and Jeju) areas.

176 The causes of death were classified according to the Korean standard classification of  
177 diseases, developed by the World Health Organization based on the ICD, into 12  
178 classifications: (i) Infection (certain infections and parasitic diseases, A00–B99); (ii)  
179 Neoplasm (neoplasms, C00–D48); (iii) Metabolic disease (endocrine, nutritional, and  
180 metabolic diseases, E00–E90); (iv) Mental disease (mental and behavioural disorders, F00–  
181 F99); (v) Neurologic disease (diseases of the nervous system, G00–G99); (vi) Circulatory  
182 disease (diseases of the circulatory system, I00–I99); (vii) Respiratory disease (diseases of  
183 the respiratory system, J00–J99); (viii) Digestive disease (diseases of the digestive system,  
184 K00–K93); (ix) Muscular disease (diseases of the musculoskeletal system and connective



1  
2  
3 185 tissue, M00–M99); (x) Genitourinary disease (diseases of the genitourinary system, N00–  
4  
5 186 N99); (xi) Abnormal finding (symptoms, signs and abnormal clinical and laboratory findings  
6  
7 187 ‘not elsewhere classified’, R00–R99); and (xii) Trauma (injury, poisoning, and certain other  
8  
9 188 consequences of external causes, S00–T98). We also added 1 more category: (xiii) Others  
10  
11 189 (diseases of the blood and blood-forming organs and certain disorders involving the immune  
12  
13 190 mechanism, D50–D89; diseases of the skin and subcutaneous tissue, L00–L99). The Charlson  
14  
15 191 comorbidity index was used for 17 comorbidities as a continuous variable (0 [no comorbidity]  
16  
17 192 through 29 [multiple comorbidities]) [10].  
18  
19  
20  
21  
22  
23

#### 24 194 **Statistical Analyses.**

25  
26 195 The chi-square or Fisher’s exact test was used to compare the general characteristics of  
27  
28 196 participants in the PD and control groups, as well as to compare their mortality rates  
29  
30 197 according to the cause of death. The false discovery rate was used to adjust for incorrect  
31  
32 198 rejections of the null hypothesis.  
33  
34

35 199 To determine hazard ratios (HRs) for mortality as a function of PD, a stratified Cox-  
36  
37 200 proportional hazards model, both crude (simple) and adjusted for the Charlson comorbidity  
38  
39 201 index, was used. Age, sex, income, and region of residence were stratified. Two-tailed P-  
40  
41 202 values less than 0.05 were considered significant. Statistical analyses were conducted using  
42  
43 203 the SPSS software, version 21.0 (IBM, Armonk, NY, USA).  
44  
45  
46  
47  
48

#### 49 205 **RESULTS**

50  
51 206 The mean follow-up duration was 49.6 months (standard deviation [SD] = 37.3 months) in  
52  
53 207 the PD group and 57.3 (SD = 40.6) months in the matched control group.  
54  
55  
56  
57  
58  
59  
60

208 Age, sex, income level, and region of residence were matched between the PD and control  
 209 groups (Table 1). The mortality rate was significantly higher in the PD group than that in the  
 210 control group (34.6% [1,214/3,510] and 19.0% [2,661/14,040], respectively,  $P < 0.001$ ).

211

212 **Table 1** General characteristics of the participants

| Characteristics | Total participants         |                |         |
|-----------------|----------------------------|----------------|---------|
|                 | Parkinson's disease (n, %) | Control (n, %) | P-value |
| Age (years old) |                            |                | 1.000   |
| 60-64           | 388 (11.1)                 | 1,552 (11.1)   |         |
| 65-69           | 660 (18.8)                 | 2,640 (18.8)   |         |
| 70-74           | 903 (25.7)                 | 3,612 (25.7)   |         |
| 75-79           | 835 (23.8)                 | 3,340 (23.8)   |         |
| 80-84           | 498 (14.2)                 | 1,992 (14.2)   |         |
| 85+             | 226 (6.4)                  | 904 (6.4)      |         |
| Sex             |                            |                | 1.000   |
| Male            | 1,336 (38.1)               | 5,344 (38.1)   |         |
| Female          | 2,174 (61.9)               | 8,696 (61.9)   |         |
| Income          |                            |                | 1.000   |
| 1 (lowest)      | 325 (9.3)                  | 1,300 (9.3)    |         |
| 2               | 283 (8.1)                  | 1,132 (8.1)    |         |
| 3               | 145 (4.1)                  | 580 (4.1)      |         |
| 4               | 154 (4.4)                  | 616 (4.4)      |         |
| 5               | 179 (5.1)                  | 716 (5.1)      |         |
| 6               | 190 (5.4)                  | 760 (5.4)      |         |
| 7               | 251 (7.2)                  | 1,004 (7.2)    |         |

|                     |              |              |         |
|---------------------|--------------|--------------|---------|
| 8                   | 256 (7.3)    | 1,024 (7.3)  |         |
| 9                   | 383 (10.9)   | 1,532 (10.9) |         |
| 10                  | 584 (16.6)   | 2,336 (16.6) |         |
| 11 (highest)        | 760 (21.7)   | 3,040 (21.7) |         |
| Region of residence |              |              | 1.000   |
| Urban               | 1,467 (41.8) | 5,868 (41.8) |         |
| Rural               | 2,043 (58.2) | 8,172 (58.2) |         |
| † CCI score         |              |              | <0.001* |
| 0                   | 325 (9.3)    | 3,049 (21.7) |         |
| 1                   | 132 (3.8)    | 659 (4.7)    |         |
| 2                   | 240 (6.8)    | 1,173 (8.4)  |         |
| ≥ 3                 | 2,813 (80.1) | 9,159 (65.2) |         |
| Death               | 1,214 (34.6) | 2,661 (19.0) | <0.001* |

213

214 \*Chi-square test or Fisher's exact test. Significance at  $P < 0.05$ 

215 † CCI, Charlson Comorbidity Index (calculated without including pulmonary disease).

216

217 The crude and adjusted HRs for mortality in the PD group were 2.29 (95% CI = 2.13–2.45,  
 218  $P < 0.001$ ) and 2.09 (95% CI = 1.94–2.24,  $P < 0.001$ ), respectively (Table 2). When  
 219 categorizing patients according to age (<70 years, 70–79 years and  $\geq 80$  years) and sex, PD  
 220 patients in all the subgroups showed higher crude and adjusted HRs for mortality than did the  
 221 control patients.

222 **Table 2** Cox proportional hazards analyses of mortality due to Parkinson's disease

| Characteristics | Hazard ratio (95% CI) |         |            |         |
|-----------------|-----------------------|---------|------------|---------|
|                 | Crude†                | P-value | Adjusted†‡ | P-value |

|                                        |                  |          |                  |          |
|----------------------------------------|------------------|----------|------------------|----------|
| Total participants (n = 17,550)        |                  |          |                  |          |
| Parkinson's disease                    | 2.29 (2.13-2.45) | < 0.001* | 2.09 (1.94-2.24) | < 0.001* |
| Control                                | 1.00             |          | 1.00             |          |
| Age < 70 years old, men (n = 2,115)    |                  |          |                  |          |
| Parkinson's disease                    | 3.04 (2.45-3.77) | < 0.001* | 2.77 (2.23-3.45) | < 0.001* |
| Control                                | 1.00             |          | 1.00             |          |
| Age < 70 years old, women (n = 3,125)  |                  |          |                  |          |
| Parkinson's disease                    | 4.11 (3.24-5.21) | < 0.001* | 3.32 (2.60-4.25) | < 0.001* |
| Control                                | 1.00             |          | 1.00             |          |
| Age 70-79 years old, men (n = 3,280)   |                  |          |                  |          |
| Parkinson's disease                    | 2.27 (1.96-2.63) | < 0.001* | 2.07 (1.78-2.41) | < 0.001* |
| Control                                | 1.00             |          | 1.00             |          |
| Age 70-79 years old, women (n = 5,410) |                  |          |                  |          |
| Parkinson's disease                    | 2.41 (2.10-2.78) | < 0.001* | 2.22 (1.92-2.55) | < 0.001* |
| Control                                | 1.00             |          | 1.00             |          |
| Age ≥ 80 years old, men (n = 1,285)    |                  |          |                  |          |
| Parkinson's disease                    | 1.53 (1.25-1.88) | < 0.001* | 1.47 (1.20-1.82) | < 0.001* |
| Control                                | 1.00             |          | 1.00             |          |
| Age ≥ 80 years old, women (n = 2,335)  |                  |          |                  |          |
| Parkinson's disease                    | 1.83 (1.55-2.17) | < 0.001* | 1.73 (1.46-2.05) | < 0.001* |
| Control                                | 1.00             |          | 1.00             |          |

223

224 \*Cox-proportional hazard regression model; significance at P &lt; 0.05

225 † Stratified model for age, sex, income, and region of residence.

226 ‡ Model adjusted for the Charlson comorbidity index.

1  
2  
3 227 HR, hazard ratio; CI, confidence interval.  
4

5 228  
6

7  
8 229 Analysis of mortality rates according to the cause of death revealed an odds ratio (OR) for  
9

10 230 overall mortality of 2.26 (95% CI = 2.08–2.45,  $P < 0.001$ ) in the PD group (Table 3); the  
11

12 231 detailed data are presented in Supplementary Table 1. Mortalities caused by metabolic  
13

14 232 disease, mental diseases, neurologic disease, circulatory disease, respiratory disease,  
15

16 233 genitourinary disease and trauma were higher in the PD group than in the control group (the  
17  
18

19 234 false discovery rate-adjusted P-value was  $<0.05$  for each). The OR for mortality was highest  
20

21 235 for neurologic disease (20.87, 95% CI = 16.05–27.14,  $P < 0.001$ ); among these neurologic  
22  
23

24 236 diseases, extrapyramidal and movement disorders were the most common (294/328, 89.6%).  
25

26 237 Mortalities caused by infection, neoplasm, digestive disease, muscular disease, and other  
27

28 238 causes were not significantly different between the PD and control groups.  
29

30  
31 239  
32  
33  
34  
35  
36  
37  
38  
39  
40  
41  
42  
43  
44  
45  
46  
47  
48  
49  
50  
51  
52  
53  
54  
55  
56  
57  
58  
59  
60

240 **Table 3** Comparison of mortality rates between the Parkinson's disease and control patient groups according to the cause of death

| Cause of death        | Total participants                    |       |                              |       | Odd ratio (95% CI)  | P-value |
|-----------------------|---------------------------------------|-------|------------------------------|-------|---------------------|---------|
|                       | Parkinson's disease (total n = 3,510) |       | Control ( total n = 14,040)  |       |                     |         |
|                       | n of died individual,<br>†%,          | ‡%    | n of died individual,<br>†%, | ‡%    |                     |         |
| All of death          | 1,214 (34.6)                          | 100.0 | 2,661 (19.0)                 | 100.0 | 2.26 (2.08-2.45)    | <0.001* |
| Infection             | 23 (0.7)                              | 1.9   | 74 (0.5)                     | 2.8   | 1.25 (0.78-1.99)    | 0.375   |
| Neoplasm              | 151 (4.3)                             | 12.4  | 667 (4.8)                    | 25.1  | 0.90 (0.75-1.08)    | 0.283   |
| Metabolic Disease     | 76 (2.2)                              | 6.2   | 161 (1.1)                    | 6.1   | 1.91 (1.45-2.51)    | <0.001* |
| Mental diseases       | 33 (0.9)                              | 2.7   | 49 (0.3)                     | 1.8   | 2.71 (1.74-4.22)    | <0.001* |
| Neurologic disease    | 328 (9.3)                             | 27.0  | 69 (0.5)                     | 2.6   | 20.87 (16.05-27.14) | <0.001* |
| Circulatory disease   | 277 (7.9)                             | 22.8  | 705 (5.0)                    | 26.5  | 1.62 (1.40-1.87)    | <0.001* |
| Respiratory disease   | 97 (2.8)                              | 8.0   | 248 (1.8)                    | 9.3   | 1.58 (1.25-2.01)    | <0.001* |
| Digestive disease     | 30 (0.9)                              | 2.5   | 88 (0.6)                     | 3.3   | 1.37 (0.90-2.07)    | 0.139   |
| Muscular disease      | 8 (0.2)                               | 0.7   | 15 (0.1)                     | 0.6   | 2.14 (0.91-5.04)    | 0.076   |
| Genitourinary disease | 25 (0.7)                              | 2.1   | 50 (0.4)                     | 1.9   | 2.01 (1.24-3.25)    | 0.004*  |

1  
2  
3  
4  
5  
6  
7  
8  
9  
10  
11  
12  
13  
14  
15  
16  
17  
18  
19  
20  
21  
22  
23  
24  
25  
26  
27  
28  
29  
30  
31  
32  
33  
34  
35  
36  
37  
38  
39  
40  
41  
42  
43  
44  
45  
46

|        |           |     |           |      |                  |        |
|--------|-----------|-----|-----------|------|------------------|--------|
| Trauma | 64 (1.8)  | 5.3 | 154 (1.1) | 5.8  | 1.68 (1.25-2.25) | 0.001* |
| Others | 102 (2.9) | 8.4 | 381 (2.7) | 14.3 | 1.07 (0.86-1.34) | 0.533  |

241

242 \* Chi-square test or Fisher’s exact test. Significance at false discovery rate-adjusted  $P < 0.05$ .

243 †%, calculated as the proportion of the number of deaths among all participants with/without mortality.

244 ‡%, calculated as the proportion of the number of deaths among participants with mortality.

245 CI, confidence interval.

## 246 DISCUSSION

247 Our findings were consistent with those of previous studies, most of which found higher  
248 mortality rates in patients with PD with HRs ranging from 1.2 to 2.4 [11,12]. However, most  
249 such studies were performed in Western countries, and data from Asian patients have rarely  
250 been reported. A recent study in China found that the standardized mortality rate of patients  
251 with PD was 0.62 (95% CI = 0.32–1.07), implying that the 5-year mortality ratio of patients  
252 with PD was not significantly higher than that of the general urban Chinese population [2].  
253 However, we cannot compare their results to ours given their different study design; the  
254 Chinese study comprised 157 PD patients who were referred to - or diagnosed at - a particular  
255 tertiary hospital. To our knowledge, ours is the first study to demonstrate that mortality rates  
256 are higher in Korean PD patients using a national cohort, and is also the largest study of its  
257 kind to date. The adjusted HR of our study (2.09) was relatively higher than in previous  
258 studies considering that most reported HRs fall between 1.2 and 2.4, however, this is of little  
259 relevance owing to the major heterogeneity among the study methodologies. Nevertheless,  
260 our data still show that the mortality of patients with PD is higher than that in control  
261 populations despite recent advances in the treatment of this disease. This indicates that, while  
262 current treatment modalities relieve motor symptoms, they do not necessarily improve  
263 mortality rates and/or the life expectancies of patients with PD.

264 Our subgroup analyses showed that patients with PD had higher mortality rates across all  
265 age groups and in both sexes. Previous studies have produced similar data, demonstrating that  
266 PD is a risk factor for increased mortality regardless of age and sex [11, 12]. The adjusted  
267 HRs were relatively high in patients with PD aged <70 years (2.77 in men and 3.32 in women)  
268 but were relatively low in patients with PD aged 70–79 years (2.07 in men and 2.22 in  
269 women) and even lower in patients with PD aged >80 years (1.47 in men and 1.73 in women).  
270 This phenomenon could be attributed to the death rates themselves increasing in both the



1  
2  
3 271 control and PD groups as individuals age, which dilutes the impact of PD on the mortality  
4  
5 272 rate of older individuals. A previous literature review by Ishihara et al. on the estimated life  
6  
7 273 expectancies of UK and European individuals with PD showed that, as the age of PD onset  
8  
9 274 increased, the standardized mortality ratio dropped gradually from 7.3 in men and 6.7 in  
10  
11 275 women in their twenties to 2.5 in both men and in women in their nineties [11]. However, this  
12  
13 276 finding may be controversial, as a systematic review and meta-analysis by Macleod et al.  
14  
15 277 found that, in 15 of 17 studies, older age either at onset or recruitment was associated with  
16  
17 278 increased mortality [12]. This discrepancy could be related to the differing ethnicities of  
18  
19 279 subjects in these studies, as well as the involved countries' economic statuses, study  
20  
21 280 populations, and research methods. The differences in adjusted HRs between men and  
22  
23 281 women were not notable in any of the age groups.

24  
25  
26  
27  
28 282 In our study, patients with PD died more frequently of certain diseases and of trauma  
29  
30 283 than their counterparts in the control population. Neurologic diseases (particularly  
31  
32 284 extrapyramidal and movement disorders) were the most common causes of death, implying  
33  
34 285 that PD features themselves were most responsible for death among PD patients in South  
35  
36 286 Korea. Such studies of the outcomes of PD patients are scarce. In a study of mortality among  
37  
38 287 211 levodopa-treated patients with PD in the United Kingdom, Morgan et al. showed that the  
39  
40 288 most common cause of death was PD itself (52.6%) [3]. They interpreted this to indicate that,  
41  
42 289 even though levodopa might improve motor symptoms such as tremor, bradykinesia, and  
43  
44 290 rigidity, it did not slow disease progression [13]. As the PD progressed, levodopa-resistant  
45  
46 291 motor symptoms (speech/swallowing impairment, gait, and balance problems) and nonmotor  
47  
48 292 symptoms (autonomic dysfunction, mood disorders, cognitive impairment, sleep disorders,  
49  
50 293 and psychosis) become more prevalent and may contribute to the increased morbidity and  
51  
52 294 mortality [14]. Although our study cohort was not necessarily confined to levodopa-treated  
53  
54 295 subjects, it is highly likely that a significant proportion of our patients were being treated with  
55  
56  
57  
58  
59  
60

1  
2  
3 296 levodopa, as we only selected patients who were treated  $\geq 2$  times for PD. Our findings are  
4  
5 297 different from those of other groups that described pneumonia to be the most common cause  
6  
7 298 of death in PD patients [15-18]. The most likely explanation for this difference could be the  
8  
9  
10 299 varying methods of patient recruitment: we recruited our subjects based on their PD treatment  
11  
12 300 history regardless of whether they were hospitalized; therefore, the cause of death among our  
13  
14 301 patients; i.e., neurologic disease that may have included PD itself, may also reflect patients  
15  
16 302 having died of other (perhaps natural) causes while afflicted with PD. However, the causes of  
17  
18 303 death in hospitalized or nursing home-bound PD patients may have had a greater likelihood  
19  
20 304 of being reported as pneumonia because of their orthostatic lability. Furthermore, our  
21  
22 305 indication that PD-group patients did not necessarily die of pneumonia is true insofar as being  
23  
24 306 compared to the control group, and is not a general statement, since we calculated the ORs of  
25  
26 307 the cause of mortality. The significance of other causes of death such as cancer and  
27  
28 308 circulation-impeding ischemic heart disease remain controversial [1, 2, 15-19]; the ORs for  
29  
30 309 these conditions were not significant in our study. Nevertheless, our most important findings  
31  
32 310 include (i) the overall death rate was higher in the PD group than that in the control group,  
33  
34 311 and (ii) metabolic disease, mental diseases, neurologic disease, circulatory disease,  
35  
36 312 respiratory disease, genitourinary disease, and trauma are common causes of death in PD  
37  
38 313 patients in addition to PD itself. Our findings ought to be valuable for PD patient caregivers  
39  
40 314 in both hospital and community settings.

41  
42 315 A limitation of our study was that we were unable to determine the severity of PD. In the  
43  
44 316 same context, we did not stratify patients by their hospitalization histories, disease durations,  
45  
46 317 or the presence of mental illness, which may have skewed the mortality data. Furthermore,  
47  
48 318 some confounding factors that can influence mortality, such as smoking status, alcohol  
49  
50 319 consumption, and obesity, were not adjusted for [20-22]. Another limitation of our study was  
51  
52 320 that the cause of death may not have encompassed all the different types of illnesses and  
53  
54  
55  
56  
57  
58  
59  
60

1  
2  
3 321 complications that contributed to the death of a patient with PD. We retrieved the causes of  
4  
5 322 death from death certificates, which only list a single condition. This may have resulted in the  
6  
7 323 underestimation of other illnesses that contributed the death of the patient. Nevertheless, the  
8  
9 324 cause of death reported on a death certificate was the most probable from among the multiple  
10  
11 325 illnesses that may have contributed to the death of the patient; hence, our data ought to be  
12  
13 326 representative in this regard.  
14  
15

16  
17 327 Despite these limitations, our data are nevertheless robust because we used a representative,  
18  
19 328 large-scale sample from a cohort database comprising over 1 million subjects over a 12-year  
20  
21 329 follow-up period. Another strength of our study is that our approach minimized the risk of  
22  
23 330 recall bias or missing information, as the dataset was based on claims made to the  
24  
25 331 compulsory HIRA nationwide health insurance system. We chose matched controls adjusted  
26  
27 332 for the potential confounding factors of age, sex, income, and region of residence. Our  
28  
29 333 subjects' comorbidity data were consistent with those of previous epidemiologic studies in  
30  
31 334 the Korean population, which was further evidence of our study's reliability [23, 24].  
32  
33  
34  
35  
36

## 37 336 **CONCLUSION**

38  
39 337 We performed the largest study on the risk of mortality in South Korean PD patients  
40  
41 338 with clearly defined inclusion criteria. We found that PD increased the risk of mortality  
42  
43 339 regardless of age and sex. Common causes of death in patients with PD included metabolic,  
44  
45 340 mental, neurologic, circulatory, respiratory, and genitourinary diseases as well as trauma; the  
46  
47 341 highest OR observed was for neurologic disease.  
48  
49  
50

51 342

## 52 343 **Acknowledgments**

53  
54 344 This work was supported in part by a research grant (NRF-2015-R1D1A1A01060860) from  
55  
56 345 the National Research Foundation (NRF) of Korea.  
57  
58  
59  
60

1  
2  
3 346  
4

5 347 **Conflict of Interest**

6  
7  
8 348 The authors do not have any conflict of interest to disclose.  
9

10 349

11  
12 350 **Author contributions:**

13  
14 351 Choi HG composed the manuscript, Lim JS provided neurologists' perspectives, Lee YK

15  
16 352 reviewed the result, and Sim S and Kim M designed and supervised the study.  
17  
18

19 353

20  
21 354 **Data sharing**

22  
23 355 The data used for this study are available from the Korea National Health Insurance Sharing

24  
25 356 Service (<https://nhiss.nhis.or.kr>) subject to their requirements and fees.  
26  
27  
28  
29  
30  
31  
32  
33  
34  
35  
36  
37  
38  
39  
40  
41  
42  
43  
44  
45  
46  
47  
48  
49  
50  
51  
52  
53  
54  
55  
56  
57  
58  
59  
60

357 **REFERENCES**

- 358 1. Doi Y, Yokoyama T, Nakamura Y, Nagai M, Fujimoto K, Nakano I. How can the  
359 national burden of Parkinson's disease comorbidity and mortality be estimated for the  
360 Japanese population? *J Epidemiol.* 2011;21(3):211-6.
- 361 2. Wang G, Li XJ, Hu YS, Cheng Q, Wang CF, Xiao Q, Liu J, Ma JF, Zhou HY, Pan J, Tan  
362 YY, Wang Y, Chen SD. Mortality from Parkinson's disease in China: Findings from a  
363 five-year follow up study in Shanghai. *Can J Neurol Sci.* 2015 Jul;42(4):242-7.
- 364 3. Morgan JC, Currie LJ, Harrison MB, Bennett JP Jr, Trugman JM, Wooten GF. Mortality  
365 in levodopa-treated Parkinson's disease. *Parkinsons Dis.* 2014;2014:426976.
- 366 4. CLarke CE. Mortality from Parkinson's disease. *J Neurol Neurosurg Psychiatry.* 2000  
367 Feb;68(2):254-5.
- 368 5. GBD 2016 Parkinson's Disease Collaborators. Global, regional, and national burden of  
369 Parkinson's disease, 1990-2016: a systematic analysis for the Global Burden of Disease  
370 Study 2016. *Lancet Neurol.* 2018 Nov;17(11):939-953.
- 371 6. de Lau LM, Schipper CM, Hofman A, Koudstaal PJ, Breteler MM. Prognosis of  
372 Parkinson disease: risk of dementia and mortality: the Rotterdam Study. *Arch Neurol.*  
373 2005 Aug;62(8):1265-9.
- 374 7. Pennington S, Snell K, Lee M, Walker R. The cause of death in idiopathic Parkinson's  
375 disease. *Parkinsonism Relat Disord.* 2010 Aug;16(7):434-7.
- 376 8. The National Health Insurance Sharing Service of Korea. 2014. Available at:  
377 <https://nhiss.nhis.or.kr/bd/ab/bdaba022eng.do>. Accessed November 1, 2018.
- 378 9. Driver JA, Logroscino G, Gaziano JM, Kurth T. Incidence and remaining lifetime risk of  
379 Parkinson disease in advanced age. *Neurology.* 2009 Feb 3;72(5):432-8.
- 380 10. Quan H, Li B, Couris CM, Fushimi K, Graham P, Hider P, Januel JM, Sundararajan V.  
381 Updating and validating the Charlson comorbidity index and score for risk adjustment in

- 1  
2  
3 382 hospital discharge abstracts using data from 6 countries. *Am J Epidemiol*. 2011 Mar  
4  
5 383 15;173(6):676-82.  
6  
7  
8 384 11. Ishihara LS, Cheesbrough A, Brayne C, Schrag A. Estimated life expectancy of  
9  
10 385 Parkinson's patients compared with the UK population. *J Neurol Neurosurg Psychiatry*.  
11  
12 386 2007 Dec;78(12):1304-9.  
13  
14 387 12. Macleod AD, Taylor KS, Counsell CE. Mortality in Parkinson's disease: a systematic  
15  
16 388 review and meta-analysis. *Mov Disord*. 2014 Nov;29(13):1615-22.  
17  
18 389 13. Olanow CW. The scientific basis for the current treatment of Parkinson's disease. *Annu*  
19  
20 390 *Rev Med*. 2004;55:41-60.  
21  
22 391 14. Rascol O, Payoux P, Ory F, Ferreira JJ, Brefel-Courbon C, Montastruc JL. Limitations of  
23  
24 392 current Parkinson's disease therapy. *Ann Neurol*. 2003;53 Suppl 3:S3-12; discussion S12-  
25  
26 393 5.  
27  
28 394 15. Hobson P, Meara J. Mortality and quality of death certification in a cohort of patients  
29  
30 395 with Parkinson's disease and matched controls in North Wales, UK at 18 years: a  
31  
32 396 community-based cohort study. *BMJ Open*. 2018 Feb 14;8(2):e018969.  
33  
34 397 16. D'Amelio M, Ragonese P, Morgante L, Reggio A, Callari G, Salemi G, Savettieri G.  
35  
36 398 Long-term survival of Parkinson's disease: a population-based study. *J Neurol*. 2006  
37  
38 399 Jan;253(1):33-7.  
39  
40 400 17. Fall PA, Saleh A, Fredrickson M, Olsson JE, Granérus AK. Survival time, mortality, and  
41  
42 401 cause of death in elderly patients with Parkinson's disease: a 9-year follow-up. *Mov*  
43  
44 402 *Disord*. 2003 Nov;18(11):1312-6.  
45  
46 403 18. Beyer MK, Herlofson K, Aarsland D, Larsen JP. Causes of death in a community based  
47  
48 404 study of Parkinson's disease. *Acta Neurol Scand*. 2001;103:7e11.  
49  
50  
51  
52  
53  
54  
55  
56  
57  
58  
59  
60

- 1  
2  
3 405 19. Ben-Shlomo Y, Marmot MG. Survival and cause of death in a cohort of patients with  
4  
5 406 parkinsonism: possible clues to aetiology? *J Neurol Neurosurg Psychiatr*.  
6  
7 407 1995;58(3):293e9.  
8  
9  
10 408 20. Ma C, Liu Y, Neumann S, Gao X. Nicotine from cigarette smoking and diet and  
11  
12 409 Parkinson disease: a review. *Transl Neurodegener*. 2017 Jul 2;6:18.  
13  
14 410 21. Bettiol SS, Rose TC, Hughes CJ, Smith LA. Alcohol Consumption and Parkinson's  
15  
16 411 Disease Risk: A Review of Recent Findings. *J Parkinsons Dis*. 2015;5(3):425-42.  
17  
18 412 22. Chen J, Guan Z, Wang L, Song G, Ma B, Wang Y. Meta-analysis: overweight, obesity,  
19  
20 413 and Parkinson's disease. *Int J Endocrinol*. 2014;2014:203930.  
21  
22  
23 414 23. Kim DJ. The epidemiology of diabetes in Korea. *Diabetes Metab J* 2011;35:303-8.  
24  
25 415 24. Lee HY, Park JB. The Korean Society of Hypertension Guidelines for the Management  
26  
27 416 of hypertension in 2013: Its essentials and key points. *Pulse (Basel)* 2015;3:21-8.  
28  
29  
30  
31 417  
32  
33  
34  
35  
36  
37  
38  
39  
40  
41  
42  
43  
44  
45  
46  
47  
48  
49  
50  
51  
52  
53  
54  
55  
56  
57  
58  
59  
60

1  
2  
3 418 **Figure legend**  
4

5 419 **Fig. 1** A schematic illustration of the participant selection process that was used in the present  
6  
7  
8 420 study. Of the 1,125,691 total participants, 4,169 with Parkinson's disease (PD) were selected.  
9  
10 421 Participants with PD were matched 1:4 with a control group comprising individuals not  
11  
12 422 diagnosed with PD. Ultimately, 3,510 participants with PD and 14,040 control participants  
13  
14 423 were included.  
15  
16  
17  
18  
19  
20  
21  
22  
23  
24  
25  
26  
27  
28  
29  
30  
31  
32  
33  
34  
35  
36  
37  
38  
39  
40  
41  
42  
43  
44  
45  
46  
47  
48  
49  
50  
51  
52  
53  
54  
55  
56  
57  
58  
59  
60

For peer review only



1  
2  
3  
4  
5  
6  
7  
8  
9  
10  
11  
12  
13  
14  
15  
16  
17  
18  
19  
20  
21  
22  
23  
24  
25  
26  
27  
28  
29  
30  
31  
32  
33  
34  
35  
36  
37  
38  
39  
40  
41  
42  
43  
44  
45  
46  
47  
48  
49  
50  
51  
52  
53  
54  
55  
56  
57  
58  
59  
60

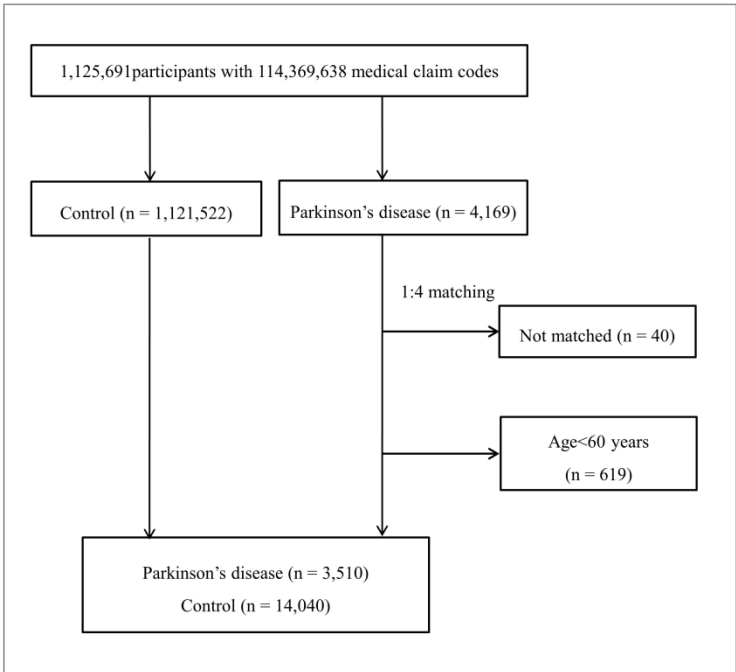

Figure 1

254x190mm (300 x 300 DPI)

**S1Table** Cause of death in dementia and control group

| Cause of death                                                             | Codes    | Total participants       |                         |
|----------------------------------------------------------------------------|----------|--------------------------|-------------------------|
|                                                                            |          | Parkinson<br>(n = 3,510) | Control<br>(n = 14,040) |
| <b>Infection</b>                                                           | A00-B99  |                          |                         |
| Intestinal Infectious Diseases                                             | A00-A09  | 6                        | 9                       |
| Tuberculosis                                                               | A15-A19  | 3                        | 25                      |
| Certain Zoonotic Bacterial diseases                                        | A20-A28  | 0                        | 0                       |
| Other bacterial diseases                                                   | A30- A49 | 13                       | 26                      |
| Infections with a predominantly sexual mode of transmission                | A50-A64  | 0                        | 0                       |
| Other spirochaetal diseases                                                | A65-A69  | 0                        | 0                       |
| Other diseases caused by chlamydiae                                        | A70-A74  | 0                        | 0                       |
| Rickettsioses                                                              | A75-A79  | 0                        | 2                       |
| Viral infections of the central nervous system                             | A80-A89  | 0                        | 0                       |
| Arthropod-borne viral fevers and viral hemorrhagic fevers                  | A92-A99  | 0                        | 0                       |
| Viral infections characterized by skin and mucous membrane lesions         | B00-B09  | 0                        | 2                       |
| Viral hepatitis                                                            | B15-B19  | 1                        | 9                       |
| Human immunodeficiency virus[HIV] disease                                  | B20-B24  | 0                        | 0                       |
| Other viral diseases                                                       | B25-B34  | 0                        | 0                       |
| Mycoses                                                                    | B35-B49  | 0                        | 0                       |
| Protozoal diseases                                                         | B50-B64  | 0                        | 0                       |
| Helminthiasis                                                              | B65-B83  | 0                        | 0                       |
| Pediculosis, acariasis and other infestations                              | B85-B89  | 0                        | 0                       |
| Sequelae of infectious and parasitic diseases                              | B90-B94  | 0                        | 1                       |
| Bacterial, viral and other infectious agents                               | B95-B98  | 0                        | 0                       |
| Other infectious diseases                                                  | B99      | 0                        | 0                       |
| <b>Neoplasm</b>                                                            | C00-D48  |                          |                         |
| Malignant neoplasm of lip, oral cavity and pharynx                         | C00-C14  | 5                        | 5                       |
| Malignant neoplasms of digestive organs                                    | C15-C26  | 67                       | 366                     |
| Malignant neoplasms of respiratory and intrathoracic organs                | C30-C39  | 28                       | 158                     |
| Malignant neoplasm of bone and articular cartilage                         | C40-C41  | 1                        | 2                       |
| Melanoma and other malignant neoplasms of skin                             | C43-C44  | 1                        | 1                       |
| Malignant neoplasms of mesothelial and soft tissue                         | C45-C49  | 1                        | 5                       |
| Malignant neoplasm of breast                                               | C50      | 2                        | 3                       |
| Malignant neoplasm of female genital organs                                | C51-C58  | 8                        | 11                      |
| Malignant neoplasm of male genital organs                                  | C60-C63  | 4                        | 29                      |
| Malignant neoplasm of urinary tract                                        | C64-C68  | 4                        | 28                      |
| Malignant neoplasm of eye, brain and other parts of central nervous system | C69-C72  | 1                        | 6                       |
| Malignant neoplasm of thyroid and other endocrine gland                    | C73-C75  | 3                        | 5                       |
| Malignant neoplasm of ill-defined, secondary and unspecified sites         | C76-C80  | 8                        | 11                      |
| Malignant neoplasms of lymphoid, hematopoietic and related tissue          | C81-C96  | 10                       | 26                      |
| Malignant neoplasm of independent (primary) multiple sites                 | C97      | 1                        | 2                       |
| In situ neoplasms                                                          | D00-D09  | 0                        | 1                       |

1  
2  
3  
4  
5  
6  
7  
8  
9  
10  
11  
12  
13  
14  
15  
16  
17  
18  
19  
20  
21  
22  
23  
24  
25  
26  
27  
28  
29  
30  
31  
32  
33  
34  
35  
36  
37  
38  
39  
40  
41  
42  
43  
44  
45  
46  
47  
48  
49  
50  
51  
52  
53  
54  
55  
56  
57  
58  
59  
60

|                                                                         |         |     |     |
|-------------------------------------------------------------------------|---------|-----|-----|
| Benign neoplasms                                                        | D10-D36 | 1   | 2   |
| Neoplasms of uncertain or unknown behaviour                             | D37-D48 | 6   | 6   |
| <b>Metabolic disease</b>                                                | E00-E90 |     |     |
| Disorders of thyroid gland                                              | E00-E07 | 1   | 0   |
| Diabetes mellitus                                                       | E10-E14 | 71  | 154 |
| Other disorders of glucose regulation and pancreatic internal secretion | E15-E16 | 0   | 0   |
| Disorders of other endocrine glands                                     | E20-E35 | 2   | 0   |
| Malnutrition                                                            | E40-E46 | 0   | 1   |
| Other nutritional deficiencies                                          | E50-E64 | 1   | 0   |
| Obesity and other hyperalimentation                                     | E65-E68 | 0   | 0   |
| Metabolic disorders                                                     | E70-E90 | 1   | 6   |
| <b>Mental disease</b>                                                   | F00-F99 |     |     |
| Organic, including symptomatic mental disorders                         | F00-F09 | 29  | 46  |
| Mental and behavioral disorders due to psychoactive substance use       | F10-F19 | 2   | 3   |
| Schizophrenia, schizotypal and delusional disorders                     | F20-F29 | 2   | 0   |
| Mood[affective] disorders                                               | F30-F39 | 0   | 0   |
| Neurotic, stress-related and somatoform disorders                       | F40-F48 | 0   | 0   |
| Behavioral syndromes associated with physiological disturbances and     | F50-F59 | 0   | 0   |
|                                                                         | F60-F69 | 0   | 0   |
|                                                                         | F70-F79 | 0   | 0   |
|                                                                         | F80-F89 | 0   | 0   |
|                                                                         | F90-F98 | 0   | 0   |
|                                                                         | F99     | 0   | 0   |
| <b>Neurologic disease</b>                                               | G00-G99 |     |     |
| Inflammatory diseases of the central nervous system                     | G00-G09 | 1   | 1   |
| Systemic atrophies primarily affecting the central nervous system       | G10-G14 | 4   | 3   |
| Extrapyramidal and movement disorders                                   | G20-G26 | 294 | 7   |
| Other degenerative diseases of the nervous system                       | G30-G32 | 22  | 51  |
| Demyelinating diseases of the central nervous system                    | G35-G37 | 0   | 0   |
| Episodic and paroxysmal disorders                                       | G40-G47 | 1   | 4   |
| Nerve, nerve root and plexus disorders                                  | G50-G59 | 0   | 0   |
| Polyneuropathies and other disorders of the peripheral nervous system   | G60-G64 | 0   | 1   |
| Diseases of myoneural junction and muscle                               | G70-G73 | 0   | 0   |
| Cerebral palsy and other paralytic syndromes                            | G80-G83 | 1   | 1   |
| Other disorders of the nervous system                                   | G90-G99 | 5   | 1   |
| <b>Circulatory disease</b>                                              | I00-I99 |     |     |
| Acute rheumatic fever                                                   | I00-I02 | 0   | 0   |
| Chronic rheumatic heart diseases                                        | I05-I09 | 0   | 3   |
| Hypertensive diseases                                                   | I10-I15 | 31  | 75  |
| Ischemic heart diseases                                                 | I20-I25 | 54  | 148 |
| Pulmonary heart disease and diseases of pulmonary circulation           | I26-I28 | 1   | 5   |
| Other forms of heart disease                                            | I30-I52 | 39  | 102 |
| Cerebrovascular diseases                                                | I60-I69 | 150 | 359 |
| Diseases of arteries, arterioles and capillaries                        | I70-I79 | 2   | 13  |

|    |                                                                     |         |    |     |
|----|---------------------------------------------------------------------|---------|----|-----|
| 1  |                                                                     |         |    |     |
| 2  |                                                                     |         |    |     |
| 3  |                                                                     |         |    |     |
| 4  | Diseases of veins, lymphatic vessels and lymph nodes, NEC           | I80-I89 | 0  | 0   |
| 5  | Other and unspecified disorders of the circulatory system           | I95-I99 | 0  | 0   |
| 6  |                                                                     |         |    |     |
| 7  | <b>Respiratory disease</b>                                          | J00-J99 |    |     |
| 8  | Acute upper respiratory infections                                  | J00-J06 | 0  | 0   |
| 9  | Influenza and pneumonia                                             | J09-J18 | 48 | 105 |
| 10 | Other acute lower respiratory infections                            | J20-J22 | 0  | 0   |
| 11 | Other diseases of upper respiratory tract                           | J30-J39 | 0  | 0   |
| 12 | Chronic lower respiratory diseases                                  | J40-J47 | 31 | 106 |
| 13 | Lung diseases due to external agents                                | J60-J70 | 13 | 20  |
| 14 | Other respiratory diseases principally affecting the interstitium   | J80-J84 | 3  | 11  |
| 15 | Suppurative and necrotic conditions of lower respiratory tract      | J85-J86 | 1  | 1   |
| 16 | Other diseases of pleura                                            | J90-J94 | 0  | 0   |
| 17 | Other diseases of the respiratory system                            | J95-J99 | 1  | 5   |
| 18 |                                                                     |         |    |     |
| 19 | <b>Digestive disease</b>                                            | K00-K93 |    |     |
| 20 | Diseases of oral cavity, salivary glands and jaws                   | K00-K14 | 0  | 0   |
| 21 | Diseases of oesophagus, stomach and duodenum                        | K20-K31 | 3  | 12  |
| 22 | Disease of appendix                                                 | K35-K38 | 0  | 0   |
| 23 | Hernia                                                              | K40-K46 | 0  | 0   |
| 24 | Noninfective enteritis and colitis                                  | K50-K52 | 1  | 0   |
| 25 | Other diseases of intestines                                        | K55-K64 | 7  | 12  |
| 26 | Diseases of peritoneum                                              | K65-K67 | 0  | 2   |
| 27 | Diseases of liver                                                   | K70-K77 | 10 | 35  |
| 28 | Disorders of gallbladder, biliary tract and pancreas                | K80-K87 | 4  | 21  |
| 29 | Other diseases of the digestive system                              | K90-K93 | 5  | 6   |
| 30 |                                                                     |         |    |     |
| 31 | <b>Muscular disease</b>                                             | M00-M99 |    |     |
| 32 | Infectious arthropathies                                            | M00-M03 | 0  | 0   |
| 33 | Inflammatory polyarthropathies                                      | M05-M14 | 2  | 3   |
| 34 | Arthrosis                                                           | M15-M19 | 0  | 0   |
| 35 | Other joint disorders                                               | M20-M25 | 0  | 0   |
| 36 | Systemic connective tissue disorder                                 | M30-M36 | 0  | 1   |
| 37 | Deformin dorsopathies                                               | M40-M43 | 0  | 0   |
| 38 | Spondylopathies                                                     | M45-M49 | 1  | 0   |
| 39 | Other dorsopathies                                                  | M50-M54 | 0  | 1   |
| 40 | Disorders of muscles                                                | M60-M63 | 0  | 2   |
| 41 | Disorders of synovium and tendon                                    | M65-M68 | 0  | 0   |
| 42 | Other soft tissue disorders                                         | M70-M79 | 0  | 1   |
| 43 | Disorders of bone density and structure                             | M80-M85 | 5  | 6   |
| 44 | Other osteopathies                                                  | M86-M90 | 0  | 1   |
| 45 | Chondropathies                                                      | M91-M94 | 0  | 0   |
| 46 | Other disorders of the musculoskeletal system and connective tissue | M95-M99 | 0  | 0   |
| 47 |                                                                     |         |    |     |
| 48 | <b>Genitourinary disease</b>                                        | N00-N99 |    |     |
| 49 | Glomerular diseases                                                 | N00-N08 | 0  | 0   |
| 50 | Renal tubulo-interstitial diseases                                  | N10-N16 | 2  | 4   |
| 51 | Renal failure                                                       | N17-N19 | 18 | 38  |
| 52 |                                                                     |         |    |     |
| 53 |                                                                     |         |    |     |
| 54 |                                                                     |         |    |     |
| 55 |                                                                     |         |    |     |
| 56 |                                                                     |         |    |     |
| 57 |                                                                     |         |    |     |
| 58 |                                                                     |         |    |     |
| 59 |                                                                     |         |    |     |
| 60 |                                                                     |         |    |     |

1  
2  
3  
4  
5  
6  
7  
8  
9  
10  
11  
12  
13  
14  
15  
16  
17  
18  
19  
20  
21  
22  
23  
24  
25  
26  
27  
28  
29  
30  
31  
32  
33  
34  
35  
36  
37  
38  
39  
40  
41  
42  
43  
44  
45  
46  
47  
48  
49  
50  
51  
52  
53  
54  
55  
56  
57  
58  
59  
60

|                                                                                                  |         |    |     |
|--------------------------------------------------------------------------------------------------|---------|----|-----|
| Urolithiasis                                                                                     | N20-N23 | 1  | 0   |
| Other disorders of kidney and ureter                                                             | N25-N29 | 0  | 0   |
| Other diseases of the urinary system                                                             | N30-N39 | 4  | 5   |
| Diseases of male genital organs                                                                  | N40-N51 | 0  | 3   |
| Disorders of breast                                                                              | N60-N64 | 0  | 0   |
| Inflammatory diseases of female pelvic organs                                                    | N70-N77 | 0  | 0   |
| Noninflammatory disorders of female genital tract                                                | N80-N98 | 0  | 0   |
| Other disorders of the genitourinary system                                                      | N99     | 0  | 0   |
| <b>Abnormal finding</b>                                                                          | R00-R99 |    |     |
| Symptoms and signs involving the circulatory and respiratory systems                             | R00-R09 | 9  | 15  |
| Symptoms and signs involving the digestive system and abdomen                                    | R10-R19 | 0  | 0   |
| Symptoms and signs involving the skin and subcutaneous tissue                                    | R20-R23 | 0  | 0   |
| symptoms and signs involving the nervous and musculoskeletal systems                             | R25-R29 | 0  | 0   |
| symptoms and signs involving the urinary system                                                  | R30-R39 | 0  | 0   |
| Symptoms and signs involving cognition, perception, emotional state and behaviour                | R40-R46 | 0  | 0   |
| Symptoms and signs involving speech and voice                                                    | R47-R49 | 0  | 0   |
| General symptoms and signs                                                                       | R50-R69 | 71 | 266 |
| Abnormal findings on examination of blood, without diagnosis                                     | R70-R79 | 0  | 0   |
| Abnormal findings on examination of urine, without diagnosis                                     | R80-R82 | 0  | 0   |
| Abnormal findings on examination of other body fluids, substances and tissues, without diagnosis | R83-R89 | 0  | 0   |
| Abnormal findings on diagnostic imaging and in function studies, without diagnosis               | R90-R94 | 0  | 0   |
| Ill-defined and unknown causes of mortality                                                      | R95-R99 | 5  | 48  |
| <b>Trauma</b>                                                                                    | S00-T98 |    |     |
| Injuries to the head                                                                             | S00-S09 | 10 | 32  |
| Injuries to the neck                                                                             | S10-S19 | 0  | 1   |
| Injuries to the thorax                                                                           | S20-S29 | 2  | 12  |
| Injuries to the abdomen, lower back, lumbar spine and pelvis                                     | S30-S39 | 0  | 3   |
| Injuries to the shoulder and upper arm                                                           | S40-S49 | 0  | 1   |
| Injuries to the elbow and forearm                                                                | S50-S59 | 1  | 0   |
| Injuries to the wrist and hand                                                                   | S60-S69 | 0  | 0   |
| Injuries to the hip and thigh                                                                    | S70-S79 | 7  | 16  |
| Injuries to the knee and lower leg                                                               | S80-S89 | 0  | 2   |
| Injuries to the ankle and foot                                                                   | S90-S99 | 0  | 0   |
| Injuries involving multiple body regions                                                         | T00-T07 | 7  | 17  |
| Injuries to unspecified part of trunk, limb or body region                                       | T08-T14 | 3  | 8   |
| Effects of foreign body entering through natural orifice                                         | T15-T19 | 6  | 2   |
| Burns and corrosions of external body surface, specified by site                                 | T20-T25 | 0  | 0   |
| Burn and corrosions confined to eye and internal organs                                          | T26-T28 | 0  | 1   |
| Burns and corrosions of multiple and unspecified of multiple and unspecified body regions        | T29-T32 | 2  | 0   |
| Frostbite                                                                                        | T33-T35 | 0  | 0   |

|                                                                                 |                     |    |    |
|---------------------------------------------------------------------------------|---------------------|----|----|
| Poisoning by drugs, medicaments and biological substances                       | T36-T50             | 1  | 1  |
| Toxic effects of substances chiefly nonmedicinal as to source                   | T51-T65             | 6  | 23 |
| Other and unspecified effects of external causes                                | T66-T78             | 18 | 33 |
| Certain early complications of trauma                                           | T79                 | 0  | 0  |
| Complications of surgical and medical care, NEC                                 | T80-T88             | 1  | 0  |
| Sequelae of injuries, of poisoning and of other consequences of external causes | T90-T98             | 0  | 2  |
| <b>Others</b>                                                                   | D50-D89,<br>L00-L99 |    |    |
| Nutritional anemias                                                             | D50-D53             | 0  | 0  |
| Hemolytic anemias                                                               | D55-D59             | 0  | 0  |
| Aplastic and other anemias                                                      | D60-D64             | 1  | 3  |
| Coagulation defect, purpura and other hemorrhage conditions                     | D65-D69             | 1  | 0  |
| Other disease of blood and blood-forming organs                                 | D70-D77             | 1  | 3  |
| Certain disorders involving the immune mechanism                                | D80-D89             | 0  | 2  |
| Other disorders of the skin and subcutaneous tissue                             | L80-L99             | 2  | 1  |
| missing                                                                         |                     | 12 | 2  |

1 STROBE Statement—Checklist of items that should be included in reports of *cohort studies*

|                                              | Item No | Recommendation                                                                                                                                                                                    | Page No. |
|----------------------------------------------|---------|---------------------------------------------------------------------------------------------------------------------------------------------------------------------------------------------------|----------|
| 2<br>3<br>4<br>5<br>6<br>7<br>8<br>9         | 1       | (a) Indicate the study's design with a commonly used term in the title or the abstract                                                                                                            | 1        |
|                                              |         | (b) Provide in the abstract an informative and balanced summary of what was done and what was found                                                                                               | 3        |
| 10 <b>Introduction</b>                       |         |                                                                                                                                                                                                   |          |
| 11<br>12<br>13                               | 2       | Background/<br>rationale                                                                                                                                                                          | 4–5      |
| 14                                           | 3       | Objectives                                                                                                                                                                                        | 5        |
| 15 <b>Methods</b>                            |         |                                                                                                                                                                                                   |          |
| 16<br>17                                     | 4       | Study design                                                                                                                                                                                      | 6        |
| 18<br>19<br>20                               | 5       | Setting                                                                                                                                                                                           | 6        |
| 21<br>22<br>23<br>24                         | 6       | (a) Give the eligibility criteria, and the sources and methods of selection of participants. Describe methods of follow-up                                                                        | 7        |
| 25                                           |         | (b) For matched studies, give matching criteria and number of exposed and unexposed                                                                                                               | 7        |
| 26<br>27                                     | 7       | Variables                                                                                                                                                                                         | 8        |
| 28<br>29<br>30<br>31                         | 8*      | Data sources/<br>measurement                                                                                                                                                                      | 8–9      |
| 32                                           | 9       | Bias                                                                                                                                                                                              | 9        |
| 33                                           | 10      | Study size                                                                                                                                                                                        | N/A      |
| 34<br>35<br>36                               | 11      | Quantitative variables                                                                                                                                                                            | 9        |
| 37<br>38<br>39<br>40<br>41<br>42<br>43<br>44 | 12      | (a) Describe all statistical methods, including those used to control for confounding                                                                                                             | 9        |
|                                              |         | (b) Describe any methods used to examine subgroups and interactions                                                                                                                               | N/A      |
|                                              |         | (c) Explain how missing data were addressed                                                                                                                                                       | N/A      |
|                                              |         | (d) If applicable, explain how loss to follow-up was addressed                                                                                                                                    | N/A      |
|                                              |         | (e) Describe any sensitivity analyses                                                                                                                                                             | N/A      |
| 45 <b>Results</b>                            |         |                                                                                                                                                                                                   |          |
| 46<br>47<br>48<br>49<br>50<br>51<br>52<br>53 | 13*     | (a) Report numbers of individuals at each stage of study—eg numbers potentially eligible, examined for eligibility, confirmed eligible, included in the study, completing follow-up, and analysed | 7        |
|                                              |         | (b) Give reasons for non-participation at each stage                                                                                                                                              | N/A      |
|                                              |         | (c) Consider use of a flow diagram                                                                                                                                                                | Fig. 1   |
| 54<br>55<br>56<br>57<br>58                   | 14*     | (a) Give characteristics of study participants (eg demographic, clinical, social) and information on exposures and potential confounders                                                          | 10–11    |
|                                              |         | (b) Indicate number of participants with missing data for each variable of interest                                                                                                               | N/A      |
|                                              |         | (c) Summarise follow-up time (eg, average and total amount)                                                                                                                                       | 9        |
| 59                                           | 15*     | Outcome data                                                                                                                                                                                      | 9–12     |
| 60                                           | 16      | Main results                                                                                                                                                                                      | 14–15    |

|                          |    |                                                                                                                                                                            |       |
|--------------------------|----|----------------------------------------------------------------------------------------------------------------------------------------------------------------------------|-------|
|                          |    | were adjusted for and why they were included                                                                                                                               |       |
|                          |    | (b) Report category boundaries when continuous variables were categorized                                                                                                  | N/A   |
|                          |    | (c) If relevant, consider translating estimates of relative risk into absolute risk for a meaningful time period                                                           | N/A   |
| Other analyses           | 17 | Report other analyses done—eg analyses of subgroups and interactions, and sensitivity analyses                                                                             | 11    |
| <b>Discussion</b>        |    |                                                                                                                                                                            |       |
| Key results              | 18 | Summarise key results with reference to study objectives                                                                                                                   | 16    |
| Limitations              | 19 | Discuss limitations of the study, taking into account sources of potential bias or imprecision. Discuss both direction and magnitude of any potential bias                 | 18–19 |
| Interpretation           | 20 | Give a cautious overall interpretation of results considering objectives, limitations, multiplicity of analyses, results from similar studies, and other relevant evidence | 19    |
| Generalisability         | 21 | Discuss the generalisability (external validity) of the study results                                                                                                      | N/A   |
| <b>Other information</b> |    |                                                                                                                                                                            |       |
| Funding                  | 22 | Give the source of funding and the role of the funders for the present study and, if applicable, for the original study on which the present article is based              | 19    |

\*Give information separately for exposed and unexposed groups.

**Note:** An Explanation and Elaboration article discusses each checklist item and gives methodological background and published examples of transparent reporting. The STROBE checklist is best used in conjunction with this article (freely available on the Web sites of PLoS Medicine at <http://www.plosmedicine.org/>, Annals of Internal Medicine at <http://www.annals.org/>, and Epidemiology at <http://www.epidem.com/>). Information on the STROBE Initiative is available at <http://www.strobe-statement.org>.



# BMJ Open

## Mortality and cause of death in South Korean patients with Parkinson's disease: A longitudinal follow-up study using a national sample cohort

|                                 |                                                                                                                                                                                                                                                                                                                                                                                                                                                                            |
|---------------------------------|----------------------------------------------------------------------------------------------------------------------------------------------------------------------------------------------------------------------------------------------------------------------------------------------------------------------------------------------------------------------------------------------------------------------------------------------------------------------------|
| Journal:                        | <i>BMJ Open</i>                                                                                                                                                                                                                                                                                                                                                                                                                                                            |
| Manuscript ID                   | bmjopen-2019-029776.R2                                                                                                                                                                                                                                                                                                                                                                                                                                                     |
| Article Type:                   | Original research                                                                                                                                                                                                                                                                                                                                                                                                                                                          |
| Date Submitted by the Author:   | 29-Aug-2019                                                                                                                                                                                                                                                                                                                                                                                                                                                                |
| Complete List of Authors:       | Choi, Hyo Geun; Hallym University College of Medicine, Hallym Data Science Laboratory; Hallym University College of Medicine<br>Lim, Jae-Sung; Hallym University Sacred Heart Hospital, Department of Neurology<br>Lee, Young Kyung; Hallym University Sacred Heart Hospital, Department of Laboratory Medicine<br>Sim, Songyong; Hallym University, Department of Statistics<br>Kim, Miyoung ; Hallym University Sacred Heart Hospital, Department of Laboratory Medicine |
| <b>Primary Subject Heading</b>: | Epidemiology                                                                                                                                                                                                                                                                                                                                                                                                                                                               |
| Secondary Subject Heading:      | Neurology                                                                                                                                                                                                                                                                                                                                                                                                                                                                  |
| Keywords:                       | Parkinson-s disease < NEUROLOGY, mortality, Korean                                                                                                                                                                                                                                                                                                                                                                                                                         |
|                                 |                                                                                                                                                                                                                                                                                                                                                                                                                                                                            |

SCHOLARONE™  
Manuscripts

1  
2  
3 **1 Mortality and cause of death in South Korean patients with Parkinson's disease: A**  
4  
5 **2 longitudinal follow-up study using a national sample cohort**  
6  
7  
8  
9

10 4 Hyo Geun Choi, MD, PhD<sup>1,2</sup>, Jae-Sung Lim, MD<sup>3</sup>, Young Kyung Lee, MD, PhD<sup>4</sup>, Songyong  
11  
12 5 Sim, PhD<sup>5\*</sup>, Miyoung Kim, MD, PhD<sup>4\*</sup>  
13  
14  
15  
16

17 7 <sup>1</sup>Hallym Data Science Laboratory, Hallym University College of Medicine, Anyang, Korea

18 8 <sup>2</sup>Department of Otorhinolaryngology-Head & Neck Surgery, Hallym University College of  
19  
20  
21 9 Medicine, Anyang, Korea

22  
23  
24 10 <sup>3</sup>Department of Neurology, Hallym University Sacred Heart Hospital, Anyang, Korea

25  
26 11 <sup>4</sup>Department of Laboratory Medicine, Hallym University Sacred Heart Hospital, Anyang,  
27  
28 12 Korea

29  
30  
31 13 <sup>5</sup>Department of Statistics, Hallym University, Chuncheon, Korea  
32  
33  
34

35 15 Running title: Parkinson's disease and mortality

36 16 Abstract word count: 240

37  
38 17 Text word count: 3251

39  
40  
41 18 Number of figures: 1

42  
43 19 Number of tables: 3

44  
45  
46 20 Number of supplementary tables: 1  
47  
48  
49  
50

51 22 Key words: Parkinson's disease, mortality, Korean  
52  
53  
54  
55

56 24 \*These authors equally contributed in this study  
57  
58  
59  
60

1  
2  
3 26 Correspondence:  
4

5 27 Miyoung Kim  
6

7  
8 28 Department of Laboratory Medicine, Hallym University Sacred Heart Hospital  
9

10 29 22, Gwanpyeong-ro 170beon-gil, Dongan-gu, Anyang-si, Gyeonggi-do, 14068, Republic of  
11

12 30 Korea  
13

14  
15 31 Tel: 82-31-380-1795; Fax: 82-31-380-1798; Email: [rabbit790622@gmail.com](mailto:rabbit790622@gmail.com)  
16

17 32  
18

19 33 Songyong Sim  
20

21 34 Department of Statistics, Hallym University,  
22

23  
24 35 Hallymro 1, Chuncheon, Gangwon-do, 24252, Republic of Korea  
25

26 36 Tel: 82-33-248-1000; Fax: 82-33-248-3333; Email: [sysim@hallym.ac.kr](mailto:sysim@hallym.ac.kr)  
27  
28  
29  
30  
31  
32  
33  
34  
35  
36  
37  
38  
39  
40  
41  
42  
43  
44  
45  
46  
47  
48  
49  
50  
51  
52  
53  
54  
55  
56  
57  
58  
59  
60

1  
2  
3 37 **Mortality and cause of death in South Korean patients with Parkinson's disease: A**  
4  
5 38 **longitudinal follow-up study using a national sample cohort**  
6  
7  
8 39

9  
10 40 **ABSTRACT**  
11

12 41 *Objective:* The incidence rate of Parkinson's disease (PD) is growing rapidly owing to the  
13  
14 42 aging population. We investigated the mortality rates and causes of death in South Korean  
15  
16  
17 43 patients with PD.

18  
19 44 *Design:* We investigated a national cohort using the nationwide insurance database.  
20

21 45 *Setting:* Korean Health Insurance Review and Assessment Service - National Sample Cohort.  
22

23  
24 46 *Participants:* We included 3,510 participants  $\geq 60$  years of age who were diagnosed with PD  
25  
26 47 between 2002 and 2013, as well as 14,040 matched controls.  
27

28 48 *Interventions:* None  
29

30  
31 49 *Primary and secondary outcome measures:* A stratified Cox proportional hazards model was  
32  
33 50 used to evaluate patients with PD who were matched 1:4 with non-PD control subjects  
34  
35 51 adjusted for age, sex, income, and region of residence. The causes of death were grouped into  
36  
37 52 12 classifications.  
38

39  
40 53 *Results:* The adjusted hazard ratio (HR) for mortality in the PD group was 2.09 (95%  
41  
42 54 confidence interval [CI] = 1.94–2.24,  $P < 0.001$ ). Subgroup analysis according to age (<70  
43  
44 55 years, 70–79 years, and  $\geq 80$  years) and sex revealed that patients with PD showed higher  
45  
46 56 adjusted HRs for mortality across all subgroups. Mortalities caused by metabolic, mental,  
47  
48 57 neurologic, circulatory, respiratory, and genitourinary diseases, as well as trauma, were more  
49  
50 58 common in the PD group than in the control group, with the highest odds ratio observed in  
51  
52 59 patients with neurologic disease.  
53

54  
55  
56 60 *Conclusions:* We demonstrated that PD in South Korean patients  $\geq 60$  years of age was  
57  
58 61 associated with increased mortality in both sexes regardless of age.  
59  
60

1  
2  
3 62  
4  
5  
6 63  
7  
8 64  
9

Key words: Parkinson's disease, mortality, Korean

### 65 **Strengths and limitations of this study**

- 66 • Our study dataset encompassed 1,125,691 subjects registered over a 12-year period in  
67 a national insurance database.
- 68 • The study encompassed all registered patients with PD who visited outpatient clinics,  
69 were hospitalized, or both at least twice.
- 70 • The patients were not restricted to only those who were hospitalized.
- 71 • The patients with PD were matched 1:4 with control subjects based on age, group,  
72 sex, income group, regions of residence, and the past medical histories.
- 73 • We were unable to determine the severity of PD, and some confounding factors (e.g.,  
74 smoking status, alcohol consumption, and obesity) were not adjusted for.

## 76 **INTRODUCTION**

77 Parkinson's disease (PD) is the second most common neurodegenerative disorder, and is  
78 characterized by the 4 cardinal motor signs: tremor at rest, bradykinesia, rigidity, and postural  
79 instability, as well as other non-motor clinical manifestations [1, 2]. Despite the remarkable  
80 symptom-relieving benefits provided by levodopa over the past 30 years, recent studies have  
81 demonstrated that the mortality rates among PD patients remain higher than in individuals  
82 without PD [3, 4]. PD is one of the fastest growing diseases in terms of prevalence, disability,  
83 and mortality; the rapidly aging population has contributed to an increase in crude PD  
84 prevalence rates [5]. As such, a better understanding of the rates and causes of mortality in  
85 patients with PD is important to better estimate the social burden and medical care costs [6].

1  
2  
3 86 Even though PD is associated with increased mortality in general, previous studies show  
4  
5 87 inconsistent data, with mortality rates ranging from 0.80 to 3.50 [2]. Some studies performed  
6  
7 88 in the post-levodopa era even reported “super-normal” survival rather than increased  
8  
9  
10 89 mortality among PD patients [2]. Furthermore, the causes of death in patients with PD remain  
11  
12 90 unclear [7]. The heterogeneity observed in studies of mortality as related to PD could be  
13  
14 91 caused by the variable methodology and patient selection criteria. Different studies tend to be  
15  
16 92 hospital-, pharmaceutical trial- or community-based, and thus yield results that are not very  
17  
18 93 representative of the general population [6].  
19  
20

21 94 According to the Global Burden of Disease, Injuries, and Risk Factors Study of 2016,  
22  
23 95 the death rate, prevalence, and disability-adjusted life-years of patients with PD varied  
24  
25 96 depending on ethnicity and/or geography [5]. Among high-income Asia Pacific countries,  
26  
27 97 South Korea showed the highest percentage change in age-standardized mortality rates  
28  
29 98 between 1990 and 2016 (24.6%) compared to Brunei (17.9%), Japan (10.2%), and Singapore  
30  
31 99 (11.3%), even though the percentage change in the age-standardized rates of prevalence  
32  
33 100 during the same time period (21.0%) was similar to that of Japan (21.3%) [5]. Thus, analyses  
34  
35 101 focused on a particular ethnic/geographic group is important to estimate the social burden of  
36  
37 102 PD and the patient management plan in each country. However, a large cohort-based  
38  
39 103 investigation of PD-related mortality rates and causes of death in South Korea has never been  
40  
41 104 performed.  
42  
43  
44  
45

46 105 To better understand the natural courses and prognoses of patients with PD, and to  
47  
48 106 provide valuable information on planning the distribution of health resources, we investigated  
49  
50 107 the mortality rates and causes of death in patients with PD using a representative PD  
51  
52 108 population in South Korea. We performed a large-scale longitudinal follow-up study, with a  
53  
54 109 maximum follow-up duration of 12 years, using national cohort data.  
55  
56  
57

58 110  
59  
60

## 111 MATERIALS AND METHODS

### 112 Patient and Public Involvement

113 No patient involved.

114

### 115 Study Population and Data Collection

116 The ethics committee of Hallym University approved the use of these data (approval number  
117 2014-I148). The requirement for written informed consent was waived by the Institutional  
118 Review Board.

119 This national cohort study relied on data from the Korean Health Insurance Review and  
120 Assessment Service (HIRA) National Sample Cohort. The Korean National Health Insurance  
121 Service (NHIS) selects samples directly from the entire population database to prevent non-  
122 sampling errors. Approximately 2% of the samples (1 million) were selected from the entire  
123 Korean population (50 million). These selected data were classified into 1,476 levels (age [18  
124 categories], sex [2 categories], and income level [41 categories]) using randomized stratified  
125 systematic sampling methods via proportional allocation to represent the entire population.  
126 After data selection, the appropriateness of the sample was verified by a statistician who  
127 compared the data from the entire Korean population to the sample data. The details of the  
128 methods used to perform these procedures are provided by the National Health Insurance  
129 Sharing Service [8]. The cohort database included (i) personal information, (ii) health  
130 insurance claim codes (procedures and prescriptions), (iii) diagnostic codes using the  
131 International Classification of Disease, 10<sup>th</sup> edition (ICD-10), (iv) death records from the  
132 Korean National Statistical Office (using the Korean Standard Classification of Disease), (v)  
133 socio-economic data (residence and income), and (vi) medical examination data for each  
134 participant over a period ranging from 2002 to 2013.

1  
2  
3 135 Because all Korean citizens are recognized by a 13-digit resident registration number  
4  
5 136 from birth to death, exact population statistics can be determined using this database. It is  
6  
7 137 mandatory for all Koreans to enroll in the NHIS. All Korean hospitals and clinics use the 13-  
8  
9 138 digit resident registration number to record individual patients in the medical insurance  
10  
11 139 system. Therefore, the risk of overlapping medical records is minimal, even if a patient  
12  
13 140 relocates to another geographical region. Moreover, all medical treatments in Korea can be  
14  
15 141 tracked without exception using the HIRA system. In Korea, a notice of death must legally be  
16  
17 142 delivered to an administrative entity before a funeral can be held. Causes and dates of death  
18  
19 143 are recorded by medical doctors on death certificates.  
20  
21  
22  
23  
24  
25

### 26 145 **Participant Selection**

27  
28 146 From among 1,125,691 individuals with 114,369,638 medical claim codes, we included  
29  
30 147 participants who visited a clinic or hospital for PD-related reasons between 2002 and 2013 (n  
31  
32 = 4,169). PD was categorized using ICD-10 codes (Parkinson's disease: G20). For accurate  
33  
34 148 diagnoses, we only selected participants who visited outpatient clinics, were hospitalized, or  
35  
36 149 both at least twice because of PD. The control participants were extracted from 1,121,522  
37  
38 150 participants who had no diagnoses of PD between 2002 and 2013.  
39  
40  
41

42 152 Participants with PD were matched 1:4 with the control group. The matches were  
43  
44 153 adjusted for age group, sex, income, region of residence, and medical histories of  
45  
46 154 hypertension, diabetes mellitus, and dyslipidemia. We set the index date as that of the first  
47  
48 155 visit to a clinic or a hospital for PD during the study period in the PD group; participants  
49  
50 156 from the control group were also followed from the same index date as their matched  
51  
52 157 counterparts with PD. To prevent selection bias, participants in the control group were sorted  
53  
54 158 using a random number, and were then selected in descending order. It was assumed that the  
55  
56 159 matched control participants were involved at the same time of each matched PD participant;  
57  
58  
59  
60



1  
2  
3 160 therefore, participants in the control group who died before the time of involvement of the  
4  
5 161 matched PD participant were excluded. Forty PD participants for whom we could not identify  
6  
7 162 a sufficient number of matching participants were also excluded, as were 619 participants  
8  
9 163 who were diagnosed with PD while under the age of 60 years since the prevalence of PD is  
10  
11 164 relatively low in younger individuals [9]. Ultimately 3,510 PD participants matched 1:4 with  
12  
13 165 14,040 control participants were included (Fig. 1).  
14  
15  
16  
17  
18

### 19 167 **Variables**

20  
21 168 Age groups were classified by 5-year intervals into 6 age groups: 60–64, 65–69, 70–74, 75–  
22  
23 169 79, 80–84, and 85+ years old. The income groups were initially divided into 41 classes (1  
24  
25 170 health aid class, 20 self-employment health insurance classes, and 20 employment health  
26  
27 171 insurance classes). These groups were re-categorized into 11 classes (class 1 [lowest income]  
28  
29 172 to class 11 [highest income]). Regions of residence were divided into 16 areas according to  
30  
31 173 the administrative district. These regions were regrouped into urban (Seoul, Busan, Daegu,  
32  
33 174 Incheon, Gwangju, Daejeon, and Ulsan) and rural (Gyeonggi, Gangwon, Chungcheongbuk,  
34  
35 175 Chungcheongnam, Jeollabuk, Jeollanam, Gyeongsangbuk, Gyeongsangnam, and Jeju) areas.  
36  
37  
38  
39

40 176 The causes of death were classified according to the Korean standard classification of  
41  
42 177 diseases, developed by the World Health Organization based on the ICD, into 12  
43  
44 178 classifications: (i) Infection (certain infections and parasitic diseases, A00–B99); (ii)  
45  
46 179 Neoplasm (neoplasms, C00–D48); (iii) Metabolic disease (endocrine, nutritional, and  
47  
48 180 metabolic diseases, E00–E90); (iv) Mental disease (mental and behavioural disorders, F00–  
49  
50 181 F99); (v) Neurologic disease (diseases of the nervous system, G00–G99); (vi) Circulatory  
51  
52 182 disease (diseases of the circulatory system, I00–I99); (vii) Respiratory disease (diseases of  
53  
54 183 the respiratory system, J00–J99); (viii) Digestive disease (diseases of the digestive system,  
55  
56 184 K00–K93); (ix) Muscular disease (diseases of the musculoskeletal system and connective  
57  
58  
59  
60

1  
2  
3 185 tissue, M00–M99); (x) Genitourinary disease (diseases of the genitourinary system, N00–  
4  
5 186 N99); (xi) Abnormal finding (symptoms, signs and abnormal clinical and laboratory findings  
6  
7 187 ‘not elsewhere classified’, R00–R99); and (xii) Trauma (injury, poisoning, and certain other  
8  
9 188 consequences of external causes, S00–T98). We also added 1 more category: (xiii) Others  
10  
11 189 (diseases of the blood and blood-forming organs and certain disorders involving the immune  
12  
13 190 mechanism, D50–D89; diseases of the skin and subcutaneous tissue, L00–L99). The Charlson  
14  
15 191 comorbidity index was used for 17 comorbidities as a continuous variable (0 [no  
16  
17 192 comorbidity] through 29 [multiple comorbidities]) [10].  
18  
19  
20  
21  
22  
23

#### 24 194 **Statistical Analyses.**

25  
26 195 The chi-square or Fisher’s exact test was used to compare the general characteristics of  
27  
28 196 participants in the PD and control groups, as well as to compare their mortality rates  
29  
30 197 according to the cause of death. The false discovery rate was used to adjust for incorrect  
31  
32 198 rejections of the null hypothesis.  
33  
34

35 199 To determine hazard ratios (HRs) for mortality as a function of PD, a stratified Cox-  
36  
37 200 proportional hazards model, both crude (simple) and adjusted for the Charlson comorbidity  
38  
39 201 index, was used. Age, sex, income, and region of residence were stratified. Two-tailed P-  
40  
41 202 values less than 0.05 were considered significant. Statistical analyses were conducted using  
42  
43 203 the SPSS software, version 21.0 (IBM, Armonk, NY, USA).  
44  
45  
46  
47  
48

#### 49 205 **RESULTS**

50  
51 206 The mean follow-up duration was 49.6 months (standard deviation [SD] = 37.3 months) in  
52  
53 207 the PD group and 57.3 (SD = 40.6) months in the matched control group.  
54  
55  
56  
57  
58  
59  
60

208 Age, sex, income level, and region of residence were matched between the PD and control  
 209 groups (Table 1). The mortality rate was significantly higher in the PD group than that in the  
 210 control group (34.6% [1,214/3,510] and 19.0% [2,661/14,040], respectively,  $P < 0.001$ ).

211

212 **Table 1** General characteristics of the participants

| Characteristics | Total participants         |                |         |
|-----------------|----------------------------|----------------|---------|
|                 | Parkinson's disease (n, %) | Control (n, %) | P-value |
| Age (years old) |                            |                | 1.000   |
| 60-64           | 388 (11.1)                 | 1,552 (11.1)   |         |
| 65-69           | 660 (18.8)                 | 2,640 (18.8)   |         |
| 70-74           | 903 (25.7)                 | 3,612 (25.7)   |         |
| 75-79           | 835 (23.8)                 | 3,340 (23.8)   |         |
| 80-84           | 498 (14.2)                 | 1,992 (14.2)   |         |
| 85+             | 226 (6.4)                  | 904 (6.4)      |         |
| Sex             |                            |                | 1.000   |
| Male            | 1,336 (38.1)               | 5,344 (38.1)   |         |
| Female          | 2,174 (61.9)               | 8,696 (61.9)   |         |
| Income          |                            |                | 1.000   |
| 1 (lowest)      | 325 (9.3)                  | 1,300 (9.3)    |         |
| 2               | 283 (8.1)                  | 1,132 (8.1)    |         |
| 3               | 145 (4.1)                  | 580 (4.1)      |         |
| 4               | 154 (4.4)                  | 616 (4.4)      |         |
| 5               | 179 (5.1)                  | 716 (5.1)      |         |
| 6               | 190 (5.4)                  | 760 (5.4)      |         |
| 7               | 251 (7.2)                  | 1,004 (7.2)    |         |

|                     |              |              |         |
|---------------------|--------------|--------------|---------|
| 8                   | 256 (7.3)    | 1,024 (7.3)  |         |
| 9                   | 383 (10.9)   | 1,532 (10.9) |         |
| 10                  | 584 (16.6)   | 2,336 (16.6) |         |
| 11 (highest)        | 760 (21.7)   | 3,040 (21.7) |         |
| Region of residence |              |              | 1.000   |
| Urban               | 1,467 (41.8) | 5,868 (41.8) |         |
| Rural               | 2,043 (58.2) | 8,172 (58.2) |         |
| † CCI score         |              |              | <0.001* |
| 0                   | 325 (9.3)    | 3,049 (21.7) |         |
| 1                   | 132 (3.8)    | 659 (4.7)    |         |
| 2                   | 240 (6.8)    | 1,173 (8.4)  |         |
| ≥ 3                 | 2,813 (80.1) | 9,159 (65.2) |         |
| Death               | 1,214 (34.6) | 2,661 (19.0) | <0.001* |

213

214 \*Chi-square test or Fisher's exact test. Significance at  $P < 0.05$ 

215 † CCI, Charlson Comorbidity Index (calculated without including pulmonary disease).

216

217 The crude and adjusted HRs for mortality in the PD group were 2.29 (95% CI = 2.13–2.45,  
 218  $P < 0.001$ ) and 2.09 (95% CI = 1.94–2.24,  $P < 0.001$ ), respectively (Table 2). When  
 219 categorizing patients according to age (<70 years, 70–79 years and  $\geq 80$  years) and sex, PD  
 220 patients in all the subgroups showed higher crude and adjusted HRs for mortality than did the  
 221 control patients.

222 **Table 2** Cox proportional hazards analyses of mortality due to Parkinson's disease

| Characteristics | Hazard ratio (95% CI) |         |            |         |
|-----------------|-----------------------|---------|------------|---------|
|                 | Crude†                | P-value | Adjusted†‡ | P-value |

|                                        |                  |          |                  |          |
|----------------------------------------|------------------|----------|------------------|----------|
| Total participants (n = 17,550)        |                  |          |                  |          |
| Parkinson's disease                    | 2.29 (2.13-2.45) | < 0.001* | 2.09 (1.94-2.24) | < 0.001* |
| Control                                | 1.00             |          | 1.00             |          |
| Age < 70 years old, men (n = 2,115)    |                  |          |                  |          |
| Parkinson's disease                    | 3.04 (2.45-3.77) | < 0.001* | 2.77 (2.23-3.45) | < 0.001* |
| Control                                | 1.00             |          | 1.00             |          |
| Age < 70 years old, women (n = 3,125)  |                  |          |                  |          |
| Parkinson's disease                    | 4.11 (3.24-5.21) | < 0.001* | 3.32 (2.60-4.25) | < 0.001* |
| Control                                | 1.00             |          | 1.00             |          |
| Age 70-79 years old, men (n = 3,280)   |                  |          |                  |          |
| Parkinson's disease                    | 2.27 (1.96-2.63) | < 0.001* | 2.07 (1.78-2.41) | < 0.001* |
| Control                                | 1.00             |          | 1.00             |          |
| Age 70-79 years old, women (n = 5,410) |                  |          |                  |          |
| Parkinson's disease                    | 2.41 (2.10-2.78) | < 0.001* | 2.22 (1.92-2.55) | < 0.001* |
| Control                                | 1.00             |          | 1.00             |          |
| Age ≥ 80 years old, men (n = 1,285)    |                  |          |                  |          |
| Parkinson's disease                    | 1.53 (1.25-1.88) | < 0.001* | 1.47 (1.20-1.82) | < 0.001* |
| Control                                | 1.00             |          | 1.00             |          |
| Age ≥ 80 years old, women (n = 2,335)  |                  |          |                  |          |
| Parkinson's disease                    | 1.83 (1.55-2.17) | < 0.001* | 1.73 (1.46-2.05) | < 0.001* |
| Control                                | 1.00             |          | 1.00             |          |

223

224 \*Cox-proportional hazard regression model; significance at P &lt; 0.05

225 † Stratified model for age, sex, income, and region of residence.

226 ‡ Model adjusted for the Charlson comorbidity index.

1  
2  
3 227 HR, hazard ratio; CI, confidence interval.  
4

5 228  
6

7  
8 229 Analysis of mortality rates according to the cause of death revealed an odds ratio (OR) for  
9

10 230 overall mortality of 2.26 (95% CI = 2.08–2.45,  $P < 0.001$ ) in the PD group (Table 3); the  
11

12 231 detailed data are presented in Supplementary Table 1. Mortalities caused by metabolic  
13

14 232 disease, mental diseases, neurologic disease, circulatory disease, respiratory disease,  
15

16 233 genitourinary disease and trauma were higher in the PD group than in the control group (the  
17

18 234 false discovery rate-adjusted P-value was  $<0.05$  for each). The OR for mortality was highest  
19

20 235 for neurologic disease (20.87, 95% CI = 16.05–27.14,  $P < 0.001$ ); among these neurologic  
21

22 236 diseases, extrapyramidal and movement disorders were the most common (294/328, 89.6%).  
23

24 237 Mortalities caused by infection, neoplasm, digestive disease, muscular disease, and other  
25

26 238 causes were not significantly different between the PD and control groups.  
27

28  
29  
30  
31 239  
32  
33  
34  
35  
36  
37  
38  
39  
40  
41  
42  
43  
44  
45  
46  
47  
48  
49  
50  
51  
52  
53  
54  
55  
56  
57  
58  
59  
60

240 **Table 3** Comparison of mortality rates between the Parkinson's disease and control patient groups according to the cause of death

| Cause of death        | Total participants                    |       |                              |       | Odd ratio (95% CI)  | P-value |
|-----------------------|---------------------------------------|-------|------------------------------|-------|---------------------|---------|
|                       | Parkinson's disease (total n = 3,510) |       | Control ( total n = 14,040)  |       |                     |         |
|                       | n of died individual,<br>†%,          | ‡%    | n of died individual,<br>†%, | ‡%    |                     |         |
| All of death          | 1,214 (34.6)                          | 100.0 | 2,661 (19.0)                 | 100.0 | 2.26 (2.08-2.45)    | <0.001* |
| Infection             | 23 (0.7)                              | 1.9   | 74 (0.5)                     | 2.8   | 1.25 (0.78-1.99)    | 0.375   |
| Neoplasm              | 151 (4.3)                             | 12.4  | 667 (4.8)                    | 25.1  | 0.90 (0.75-1.08)    | 0.283   |
| Metabolic Disease     | 76 (2.2)                              | 6.2   | 161 (1.1)                    | 6.1   | 1.91 (1.45-2.51)    | <0.001* |
| Mental diseases       | 33 (0.9)                              | 2.7   | 49 (0.3)                     | 1.8   | 2.71 (1.74-4.22)    | <0.001* |
| Neurologic disease    | 328 (9.3)                             | 27.0  | 69 (0.5)                     | 2.6   | 20.87 (16.05-27.14) | <0.001* |
| Circulatory disease   | 277 (7.9)                             | 22.8  | 705 (5.0)                    | 26.5  | 1.62 (1.40-1.87)    | <0.001* |
| Respiratory disease   | 97 (2.8)                              | 8.0   | 248 (1.8)                    | 9.3   | 1.58 (1.25-2.01)    | <0.001* |
| Digestive disease     | 30 (0.9)                              | 2.5   | 88 (0.6)                     | 3.3   | 1.37 (0.90-2.07)    | 0.139   |
| Muscular disease      | 8 (0.2)                               | 0.7   | 15 (0.1)                     | 0.6   | 2.14 (0.91-5.04)    | 0.076   |
| Genitourinary disease | 25 (0.7)                              | 2.1   | 50 (0.4)                     | 1.9   | 2.01 (1.24-3.25)    | 0.004*  |

1  
2  
3  
4  
5  
6  
7  
8  
9  
10  
11  
12  
13  
14  
15  
16  
17  
18  
19  
20  
21  
22  
23  
24  
25  
26  
27  
28  
29  
30  
31  
32  
33  
34  
35  
36  
37  
38  
39  
40  
41  
42  
43  
44  
45  
46

|        |           |     |           |      |                  |        |
|--------|-----------|-----|-----------|------|------------------|--------|
| Trauma | 64 (1.8)  | 5.3 | 154 (1.1) | 5.8  | 1.68 (1.25-2.25) | 0.001* |
| Others | 102 (2.9) | 8.4 | 381 (2.7) | 14.3 | 1.07 (0.86-1.34) | 0.533  |

241

242 \* Chi-square test or Fisher’s exact test. Significance at false discovery rate-adjusted  $P < 0.05$ .

243 †%, calculated as the proportion of the number of deaths among all participants with/without mortality.

244 ‡%, calculated as the proportion of the number of deaths among participants with mortality.

245 CI, confidence interval.

For peer review only



## 246 DISCUSSION

247 Our findings were consistent with those of previous studies, most of which found higher  
248 mortality rates in patients with PD with HRs ranging from 1.2 to 2.4 [11,12]. However, most  
249 such studies were performed in Western countries, and data from Asian patients have rarely  
250 been reported. A recent study in China found that the standardized mortality rate of patients  
251 with PD was 0.62 (95% CI = 0.32–1.07), implying that the 5-year mortality ratio of patients  
252 with PD was not significantly higher than that of the general urban Chinese population [2].  
253 However, we cannot compare their results to ours given their different study design; the  
254 Chinese study comprised 157 PD patients who were referred to - or diagnosed at - a particular  
255 tertiary hospital. To our knowledge, ours is the first study to demonstrate that mortality rates  
256 are higher in Korean PD patients using a national cohort, and is also the largest study of its  
257 kind to date. The adjusted HR of our study (2.09) was relatively higher than in previous  
258 studies considering that most reported HRs fall between 1.2 and 2.4, however, this is of little  
259 relevance owing to the major heterogeneity among the study methodologies. Nevertheless,  
260 our data still show that the mortality of patients with PD is higher than that in control  
261 populations despite recent advances in the treatment of this disease. This indicates that, while  
262 current treatment modalities relieve motor symptoms, they do not necessarily improve  
263 mortality rates and/or the life expectancies of patients with PD.

264 Our subgroup analyses showed that patients with PD had higher mortality rates across all  
265 age groups and in both sexes. Previous studies have produced similar data, demonstrating that  
266 PD is a risk factor for increased mortality regardless of age and sex [11, 12]. The adjusted  
267 HRs were relatively high in patients with PD aged <70 years (2.77 in men and 3.32 in  
268 women) but were relatively low in patients with PD aged 70–79 years (2.07 in men and 2.22  
269 in women) and even lower in patients with PD aged >80 years (1.47 in men and 1.73 in  
270 women). This phenomenon could be attributed to the death rates themselves increasing in

1  
2  
3 271 both the control and PD groups as individuals age, which dilutes the impact of PD on the  
4  
5 272 mortality rate of older individuals. A previous literature review by Ishihara et al. on the  
6  
7 273 estimated life expectancies of UK and European individuals with PD showed that, as the age  
8  
9 274 of PD onset increased, the standardized mortality ratio dropped gradually from 7.3 in men  
10  
11 275 and 6.7 in women in their twenties to 2.5 in both men and in women in their nineties [11].  
12  
13  
14 276 However, this finding may be controversial, as a systematic review and meta-analysis by  
15  
16 277 Macleod et al. found that, in 15 of 17 studies, older age either at onset or recruitment was  
17  
18 278 associated with increased mortality [12]. This discrepancy could be related to the differing  
19  
20 279 ethnicities of subjects in these studies, as well as the involved countries' economic statuses,  
21  
22 280 study populations, and research methods. The differences in adjusted HRs between men and  
23  
24 281 women were not notable in any of the age groups.  
25  
26  
27

28 282 In our study, patients with PD died more frequently of certain diseases and of trauma  
29  
30 283 than their counterparts in the control population. Neurologic diseases (particularly  
31  
32 284 extrapyramidal and movement disorders) were the most common causes of death, implying  
33  
34 285 that PD features themselves were most responsible for death among PD patients in South  
35  
36 286 Korea. Such studies of the outcomes of PD patients are scarce. In a study of mortality among  
37  
38 287 211 levodopa-treated patients with PD in the United Kingdom, Morgan et al. showed that the  
39  
40 288 most common cause of death was PD itself (52.6%) [3]. They interpreted this to indicate that,  
41  
42 289 even though levodopa might improve motor symptoms such as tremor, bradykinesia, and  
43  
44 290 rigidity, it did not slow disease progression [13]. As the PD progressed, levodopa-resistant  
45  
46 291 motor symptoms (speech/swallowing impairment, gait, and balance problems) and nonmotor  
47  
48 292 symptoms (autonomic dysfunction, mood disorders, cognitive impairment, sleep disorders,  
49  
50 293 and psychosis) become more prevalent and may contribute to the increased morbidity and  
51  
52 294 mortality [14]. Although our study cohort was not necessarily confined to levodopa-treated  
53  
54 295 subjects, it is highly likely that a significant proportion of our patients were being treated with  
55  
56  
57  
58  
59  
60

1  
2  
3 296 levodopa, as we only selected patients who were treated  $\geq 2$  times for PD. Our findings are  
4  
5 297 different from those of other groups that described pneumonia to be the most common cause  
6  
7 298 of death in PD patients [15-18]. The most likely explanation for this difference could be the  
8  
9  
10 299 varying methods of patient recruitment: we recruited our subjects based on their PD treatment  
11  
12 300 history regardless of whether they were hospitalized; therefore, the cause of death among our  
13  
14 301 patients; i.e., neurologic disease that may have included PD itself, may also reflect patients  
15  
16 302 having died of other (perhaps natural) causes while afflicted with PD. However, the causes of  
17  
18 303 death in hospitalized or nursing home-bound PD patients may have had a greater likelihood  
19  
20 304 of being reported as pneumonia because of their orthostatic lability. Furthermore, our  
21  
22 305 indication that PD-group patients did not necessarily die of pneumonia is true insofar as being  
23  
24 306 compared to the control group, and is not a general statement, since we calculated the ORs of  
25  
26 307 the cause of mortality. The significance of other causes of death such as cancer and  
27  
28 308 circulation-impeding ischemic heart disease remain controversial [1, 2, 15-19]; the ORs for  
29  
30 309 these conditions were not significant in our study. Nevertheless, our most important findings  
31  
32 310 include (i) the overall death rate was higher in the PD group than that in the control group,  
33  
34 311 and (ii) metabolic disease, mental diseases, neurologic disease, circulatory disease,  
35  
36 312 respiratory disease, genitourinary disease, and trauma are common causes of death in PD  
37  
38 313 patients in addition to PD itself. Our findings ought to be valuable for PD patient caregivers  
39  
40 314 in both hospital and community settings.

41  
42 315 An interesting observation was that the proportion of female patients with PD was  
43  
44 316 higher than that of their male counterparts (Table 1). No studies have investigated the  
45  
46 317 sex ratio of patients with PD in Korea to date, so we had no records to compare our  
47  
48 318 results to. However, this observation should be interpreted considering the prevalence  
49  
50 319 of PD among each of the sexes in Korea, the prevalence of PD in different age groups,  
51  
52 320 and the different life expectancies of men and women in Korea. A recent large-scale  
53  
54  
55  
56  
57  
58  
59  
60

1  
2  
3 321 study utilizing the National Health Insurance Service-National Sample Cohort Database  
4  
5 322 by Lee et al. found that the prevalence of PD in Korea was slightly higher among women  
6  
7 323 (47.4 per 100,000 population) than among men (35.4 per 100,000 population) in 2004;  
8  
9 324 these rates gradually increased to 167.3 and 117.7 per 100,000 population,  
10  
11 325 respectively, in 2013 [20]. Lee et al.'s study also found that the prevalence of PD  
12  
13 326 dramatically increased with age; the PD rates in 2004 were 8.1 and 310.9 per 100,000  
14  
15 327 population among 40–49- and  $\geq 80$ -year-old subjects, respectively, and had risen to 20.9  
16  
17 328 and 1,226.3 per 100,000 population, respectively, in 2013. The proportion of  
18  
19 329 individuals in our overall cohort who had PD was different from those in the  
20  
21 330 abovementioned studies because, as stated in Materials and Methods, we used different  
22  
23 331 criteria in selecting PD patients to ensure their actual diagnosis with the disease.  
24  
25 332 Moreover, the life expectancy of men in Korea is shorter than that of women (74.65 vs.  
26  
27 333 81.48 years, respectively, in 2004 and 80.01 vs. 86.04 years, respectively, in 2017) [21].  
28  
29 334 Shin et al. reported that the rates of death among individuals  $\geq 80$  years of age were  
30  
31 335 29.5% for men and 58.0% for women [22].  
32  
33  
34  
35  
36  
37

38 336 Taken together, we can speculate that the relatively high proportion of women in  
39  
40 337 both the general and PD patient populations in Korea (particularly older age groups,  
41  
42 338 which have a higher prevalence of PD and longer life expectancy) could have resulted in  
43  
44 339 a higher proportion of women with the disease than men. This reasoning is supported  
45  
46 340 by the relatively high number of patients with PD in the older age groups as shown in  
47  
48 341 Tables 1 and 2. Our results not only confirm that there were relatively high numbers of  
49  
50 342 patients with PD in the 80–84- and  $\geq 85$ -year age groups, but also show that the male-  
51  
52 343 to-female ratio among patients with PD who are  $< 70$  years was higher than that in  
53  
54 344 patients 70–79 years; those  $\geq 80$  years showed the lowest male-to-female ratio. Further  
55  
56  
57  
58  
59  
60

1  
2  
3 345 studies regarding the male/female proportions among patients with PD in different age groups  
4  
5 346 would be helpful to clarify these patterns.  
6  
7

8 347 A limitation of our study was that we were unable to determine the severity of PD. In the  
9  
10 348 same context, we did not stratify patients by their hospitalization histories, disease durations,  
11  
12 349 or the presence of mental illness, which may have skewed the mortality data. Furthermore,  
13  
14 350 some confounding factors that can influence mortality, such as smoking status, alcohol  
15  
16 351 consumption, and obesity, were not adjusted for [23-25]. Another limitation of our study was  
17  
18 352 that the cause of death may not have encompassed all the different types of illnesses and  
19  
20 353 complications that contributed to the death of a patient with PD. We retrieved the causes of  
21  
22 354 death from death certificates, which only list a single condition. This may have resulted in the  
23  
24 355 underestimation of other illnesses that contributed the death of the patient. Nevertheless, the  
25  
26 356 cause of death reported on a death certificate was the most probable from among the multiple  
27  
28 357 illnesses that may have contributed to the death of the patient; hence, our data ought to be  
29  
30 358 representative in this regard.  
31  
32  
33  
34

35 359 Despite these limitations, our data are nevertheless robust because we used a  
36  
37 360 representative, large-scale sample from a cohort database comprising over 1 million subjects  
38  
39 361 over a 12-year follow-up period. Another strength of our study is that our approach  
40  
41 362 minimized the risk of recall bias or missing information, as the dataset was based on claims  
42  
43 363 made to the compulsory HIRA nationwide health insurance system. We chose matched  
44  
45 364 controls adjusted for the potential confounding factors of age, sex, income, and region of  
46  
47 365 residence. Our subjects' comorbidity data were consistent with those of previous  
48  
49 366 epidemiologic studies in the Korean population, which was further evidence of our study's  
50  
51 367 reliability [26,27].  
52  
53  
54  
55

56 368  
57  
58  
59  
60

1  
2  
3 369 **CONCLUSION**  
4

5 370 We performed the largest study on the risk of mortality in South Korean PD patients  
6  
7 371 with clearly defined inclusion criteria. We found that PD increased the risk of mortality  
8  
9 372 regardless of age and sex. Common causes of death in patients with PD included metabolic,  
10  
11 373 mental, neurologic, circulatory, respiratory, and genitourinary diseases as well as trauma; the  
12  
13 374 highest OR observed was for neurologic disease.  
14  
15  
16

17 375  
18  
19 376 **Acknowledgments**  
20

21 377 This work was supported in part by a research grant (NRF-2015-R1D1A1A01060860) from  
22  
23 378 the National Research Foundation (NRF) of Korea.  
24  
25

26 379  
27  
28 380 **Conflict of Interest**  
29

30 381 The authors do not have any conflict of interest to disclose.  
31  
32

33 382  
34  
35 383 **Author contributions:**  
36

37 384 Choi HG composed the manuscript, Lim JS provided neurologists' perspectives, Lee YK  
38  
39 385 reviewed the result, and Sim S and Kim M designed and supervised the study.  
40  
41

42 386  
43  
44 387 **Data sharing**  
45

46 388 The data used for this study are available from the Korea National Health Insurance Sharing  
47  
48 389 Service (<https://nhiss.nhis.or.kr>) subject to their requirements and fees.  
49  
50  
51  
52  
53  
54  
55  
56  
57  
58  
59  
60

390 **REFERENCES**

- 391 1. Doi Y, Yokoyama T, Nakamura Y, Nagai M, Fujimoto K, Nakano I. How can the  
392 national burden of Parkinson's disease comorbidity and mortality be estimated for the  
393 Japanese population? *J Epidemiol.* 2011;21(3):211-6.
- 394 2. Wang G, Li XJ, Hu YS, Cheng Q, Wang CF, Xiao Q, Liu J, Ma JF, Zhou HY, Pan J, Tan  
395 YY, Wang Y, Chen SD. Mortality from Parkinson's disease in China: Findings from a  
396 five-year follow up study in Shanghai. *Can J Neurol Sci.* 2015 Jul;42(4):242-7.
- 397 3. Morgan JC, Currie LJ, Harrison MB, Bennett JP Jr, Trugman JM, Wooten GF. Mortality  
398 in levodopa-treated Parkinson's disease. *Parkinsons Dis.* 2014;2014:426976.
- 399 4. CLarke CE. Mortality from Parkinson's disease. *J Neurol Neurosurg Psychiatry.* 2000  
400 Feb;68(2):254-5.
- 401 5. GBD 2016 Parkinson's Disease Collaborators. Global, regional, and national burden of  
402 Parkinson's disease, 1990-2016: a systematic analysis for the Global Burden of Disease  
403 Study 2016. *Lancet Neurol.* 2018 Nov;17(11):939-953.
- 404 6. de Lau LM, Schipper CM, Hofman A, Koudstaal PJ, Breteler MM. Prognosis of  
405 Parkinson disease: risk of dementia and mortality: the Rotterdam Study. *Arch Neurol.*  
406 2005 Aug;62(8):1265-9.
- 407 7. Pennington S, Snell K, Lee M, Walker R. The cause of death in idiopathic Parkinson's  
408 disease. *Parkinsonism Relat Disord.* 2010 Aug;16(7):434-7.
- 409 8. The National Health Insurance Sharing Service of Korea. 2014. Available at:  
410 <https://nhiss.nhis.or.kr/bd/ab/bdaba022eng.do>. Accessed November 1, 2018.
- 411 9. Driver JA, Logroscino G, Gaziano JM, Kurth T. Incidence and remaining lifetime risk of  
412 Parkinson disease in advanced age. *Neurology.* 2009 Feb 3;72(5):432-8.
- 413 10. Quan H, Li B, Couris CM, Fushimi K, Graham P, Hider P, Januel JM, Sundararajan V.  
414 Updating and validating the Charlson comorbidity index and score for risk adjustment in

- 1  
2  
3 415 hospital discharge abstracts using data from 6 countries. *Am J Epidemiol*. 2011 Mar  
4  
5 416 15;173(6):676-82.  
6  
7  
8 417 11. Ishihara LS, Cheesbrough A, Brayne C, Schrag A. Estimated life expectancy of  
9  
10 418 Parkinson's patients compared with the UK population. *J Neurol Neurosurg Psychiatry*.  
11  
12 419 2007 Dec;78(12):1304-9.  
13  
14 420 12. Macleod AD, Taylor KS, Counsell CE. Mortality in Parkinson's disease: a systematic  
15  
16 421 review and meta-analysis. *Mov Disord*. 2014 Nov;29(13):1615-22.  
17  
18 422 13. Olanow CW. The scientific basis for the current treatment of Parkinson's disease. *Annu*  
19  
20 423 *Rev Med*. 2004;55:41-60.  
21  
22 424 14. Rascol O, Payoux P, Ory F, Ferreira JJ, Brefel-Courbon C, Montastruc JL. Limitations of  
23  
24 425 current Parkinson's disease therapy. *Ann Neurol*. 2003;53 Suppl 3:S3-12; discussion S12-  
25  
26 426 5.  
27  
28 427 15. Hobson P, Meara J. Mortality and quality of death certification in a cohort of patients  
29  
30 428 with Parkinson's disease and matched controls in North Wales, UK at 18 years: a  
31  
32 429 community-based cohort study. *BMJ Open*. 2018 Feb 14;8(2):e018969.  
33  
34 430 16. D'Amelio M, Ragonese P, Morgante L, Reggio A, Callari G, Salemi G, Savettieri G.  
35  
36 431 Long-term survival of Parkinson's disease: a population-based study. *J Neurol*. 2006  
37  
38 432 Jan;253(1):33-7.  
39  
40 433 17. Fall PA, Saleh A, Fredrickson M, Olsson JE, Granérus AK. Survival time, mortality, and  
41  
42 434 cause of death in elderly patients with Parkinson's disease: a 9-year follow-up. *Mov*  
43  
44 435 *Disord*. 2003 Nov;18(11):1312-6.  
45  
46 436 18. Beyer MK, Herlofson K, Aarsland D, Larsen JP. Causes of death in a community based  
47  
48 437 study of Parkinson's disease. *Acta Neurol Scand*. 2001;103:7e11.  
49  
50  
51  
52  
53  
54  
55  
56  
57  
58  
59  
60



- 1  
2  
3 438 19. Ben-Shlomo Y, Marmot MG. Survival and cause of death in a cohort of patients with  
4  
5 439 parkinsonism: possible clues to aetiology? *J Neurol Neurosurg Psychiatr*.  
6  
7 440 1995;58(3):293e9.  
8  
9  
10 441 20. Lee JE, Choi J, Lim HS, Kim JH, Cho JH, Kim GS, Lee PH, Sohn YH, Lee JH. The  
11  
12 442 prevalence and incidence of Parkinson's Disease in South Korea: a 10-year nationwide  
13  
14  
15 443 population-based study. *J Korean Neurol Assoc* 2017; 35(4): 191-198.  
16  
17  
18  
19 444 21. Khang YH, Bahk J, Lim D, Kang HY, Lim HK, Kim YY, Park JH. Trends in inequality  
20  
21 445 in life expectancy at birth between 2004 and 2017 and projections for 2030 in Korea:  
22  
23 446 multiyear cross-sectional differences by income from national health insurance data.  
24  
25 447 *BMJ Open*. 2019 Jul 3;9(7):e030683.  
26  
27  
28 448 22. Vital Statistics Division, Statistics Korea, Shin HY, Lee JY, Kim JE, Lee S, Youn H,  
29  
30 449 Kim H, Lee J, Park MS, Huh S. Cause-of-death statistics in 2016 in the Republic of  
31  
32 450 Korea. *J Korean Med Assoc*. 2018 Sep;61(9):573-584.  
33  
34  
35 451 23. Ma C, Liu Y, Neumann S, Gao X. Nicotine from cigarette smoking and diet and  
36  
37 452 Parkinson disease: a review. *Transl Neurodegener*. 2017 Jul 2;6:18.  
38  
39  
40 453 24. Bettiol SS, Rose TC, Hughes CJ, Smith LA. Alcohol Consumption and Parkinson's  
41  
42 454 Disease Risk: A Review of Recent Findings. *J Parkinsons Dis*. 2015;5(3):425-42.  
43  
44  
45 455 25. Chen J, Guan Z, Wang L, Song G, Ma B, Wang Y. Meta-analysis: overweight, obesity,  
46  
47 456 and Parkinson's disease. *Int J Endocrinol*. 2014;2014:203930.  
48  
49 457 26. Kim DJ. The epidemiology of diabetes in Korea. *Diabetes Metab J* 2011;35:303-8.  
50  
51 458 27. Lee HY, Park JB. The Korean Society of Hypertension Guidelines for the Management  
52  
53 459 of hypertension in 2013: Its essentials and key points. *Pulse (Basel)* 2015;3:21-8.  
54  
55  
56 460

1  
2  
3 461 **Figure legend**  
4

5 462 **Fig. 1** A schematic illustration of the participant selection process that was used in the present  
6  
7  
8 463 study. Of the 1,125,691 total participants, 4,169 with Parkinson's disease (PD) were selected.  
9  
10 464 Participants with PD were matched 1:4 with a control group comprising individuals not  
11  
12 465 diagnosed with PD. Ultimately, 3,510 participants with PD and 14,040 control participants  
13  
14  
15 466 were included.  
16  
17  
18  
19  
20  
21  
22  
23  
24  
25  
26  
27  
28  
29  
30  
31  
32  
33  
34  
35  
36  
37  
38  
39  
40  
41  
42  
43  
44  
45  
46  
47  
48  
49  
50  
51  
52  
53  
54  
55  
56  
57  
58  
59  
60

For peer review only

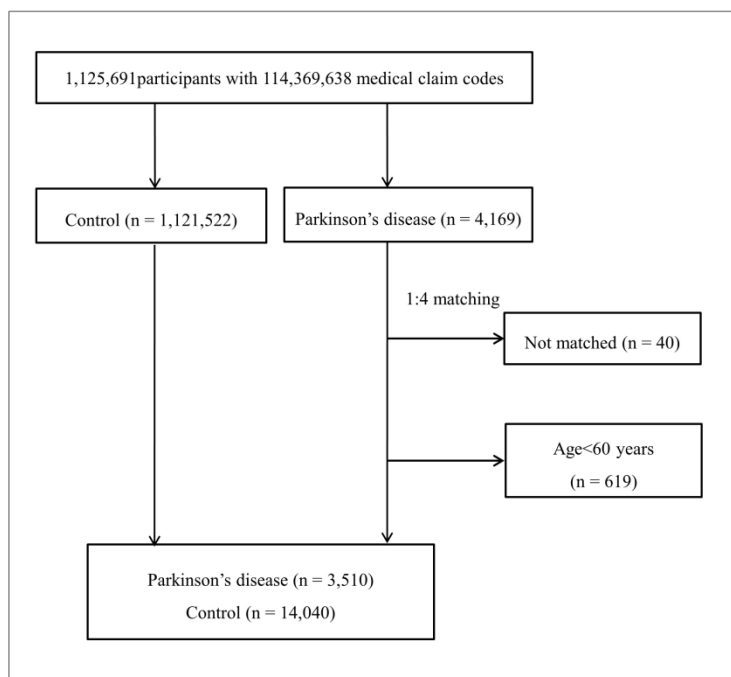

Figure 1

254x190mm (300 x 300 DPI)

**S1Table** Cause of death in dementia and control group

| Cause of death                                                             | Codes    | Total participants       |                         |
|----------------------------------------------------------------------------|----------|--------------------------|-------------------------|
|                                                                            |          | Parkinson<br>(n = 3,510) | Control<br>(n = 14,040) |
| <b>Infection</b>                                                           | A00-B99  |                          |                         |
| Intestinal Infectious Diseases                                             | A00-A09  | 6                        | 9                       |
| Tuberculosis                                                               | A15-A19  | 3                        | 25                      |
| Certain Zoonotic Bacterial diseases                                        | A20-A28  | 0                        | 0                       |
| Other bacterial diseases                                                   | A30- A49 | 13                       | 26                      |
| Infections with a predominantly sexual mode of transmission                | A50-A64  | 0                        | 0                       |
| Other spirochaetal diseases                                                | A65-A69  | 0                        | 0                       |
| Other diseases caused by chlamydiae                                        | A70-A74  | 0                        | 0                       |
| Rickettsioses                                                              | A75-A79  | 0                        | 2                       |
| Viral infections of the central nervous system                             | A80-A89  | 0                        | 0                       |
| Arthropod-borne viral fevers and viral hemorrhagic fevers                  | A92-A99  | 0                        | 0                       |
| Viral infections characterized by skin and mucous membrane lesions         | B00-B09  | 0                        | 2                       |
| Viral hepatitis                                                            | B15-B19  | 1                        | 9                       |
| Human immunodeficiency virus[HIV] disease                                  | B20-B24  | 0                        | 0                       |
| Other viral diseases                                                       | B25-B34  | 0                        | 0                       |
| Mycoses                                                                    | B35-B49  | 0                        | 0                       |
| Protozoal diseases                                                         | B50-B64  | 0                        | 0                       |
| Helminthiases                                                              | B65-B83  | 0                        | 0                       |
| Pediculosis, acariasis and other infestations                              | B85-B89  | 0                        | 0                       |
| Sequelae of infectious and parasitic diseases                              | B90-B94  | 0                        | 1                       |
| Bacterial, viral and other infectious agents                               | B95-B98  | 0                        | 0                       |
| Other infectious diseases                                                  | B99      | 0                        | 0                       |
| <b>Neoplasm</b>                                                            | C00-D48  |                          |                         |
| Malignant neoplasm of lip, oral cavity and pharynx                         | C00-C14  | 5                        | 5                       |
| Malignant neoplasms of digestive organs                                    | C15-C26  | 67                       | 366                     |
| Malignant neoplasms of respiratory and intrathoracic organs                | C30-C39  | 28                       | 158                     |
| Malignant neoplasm of bone and articular cartilage                         | C40-C41  | 1                        | 2                       |
| Melanoma and other malignant neoplasms of skin                             | C43-C44  | 1                        | 1                       |
| Malignant neoplasms of mesothelial and soft tissue                         | C45-C49  | 1                        | 5                       |
| Malignant neoplasm of breast                                               | C50      | 2                        | 3                       |
| Malignant neoplasm of female genital organs                                | C51-C58  | 8                        | 11                      |
| Malignant neoplasm of male genital organs                                  | C60-C63  | 4                        | 29                      |
| Malignant neoplasm of urinary tract                                        | C64-C68  | 4                        | 28                      |
| Malignant neoplasm of eye, brain and other parts of central nervous system | C69-C72  | 1                        | 6                       |
| Malignant neoplasm of thyroid and other endocrine gland                    | C73-C75  | 3                        | 5                       |
| Malignant neoplasm of ill-defined, secondary and unspecified sites         | C76-C80  | 8                        | 11                      |
| Malignant neoplasms of lymphoid, hematopoietic and related tissue          | C81-C96  | 10                       | 26                      |
| Malignant neoplasm of independent (primary) multiple sites                 | C97      | 1                        | 2                       |
| In situ neoplasms                                                          | D00-D09  | 0                        | 1                       |

|    |                                                                         |         |     |     |
|----|-------------------------------------------------------------------------|---------|-----|-----|
| 1  |                                                                         |         |     |     |
| 2  |                                                                         |         |     |     |
| 3  |                                                                         |         |     |     |
| 4  | Benign neoplasms                                                        | D10-D36 | 1   | 2   |
| 5  | Neoplasms of uncertain or unknown behaviour                             | D37-D48 | 6   | 6   |
| 6  |                                                                         |         |     |     |
| 7  | <b>Metabolic disease</b>                                                | E00-E90 |     |     |
| 8  | Disorders of thyroid gland                                              | E00-E07 | 1   | 0   |
| 9  | Diabetes mellitus                                                       | E10-E14 | 71  | 154 |
| 10 | Other disorders of glucose regulation and pancreatic internal secretion | E15-E16 | 0   | 0   |
| 11 | Disorders of other endocrine glands                                     | E20-E35 | 2   | 0   |
| 12 | Malnutrition                                                            | E40-E46 | 0   | 1   |
| 13 | Other nutritional deficiencies                                          | E50-E64 | 1   | 0   |
| 14 | Obesity and other hyperalimentation                                     | E65-E68 | 0   | 0   |
| 15 | Metabolic disorders                                                     | E70-E90 | 1   | 6   |
| 16 |                                                                         |         |     |     |
| 17 | <b>Mental disease</b>                                                   | F00-F99 |     |     |
| 18 |                                                                         |         |     |     |
| 19 | Organic, including symptomatic                                          | F00-F09 | 29  | 46  |
| 20 | mental disorders                                                        | F10-F19 | 2   | 3   |
| 21 | Mental and behavioral disorders                                         | F20-F29 | 2   | 0   |
| 22 | due to psychoactive substance use                                       | F30-F39 | 0   | 0   |
| 23 | Schizophrenia, schizotypal and                                          | F40-F48 | 0   | 0   |
| 24 | delusional disorders                                                    | F50-F59 | 0   | 0   |
| 25 | Mood[affective] disorders                                               | F60-F69 | 0   | 0   |
| 26 | Neurotic, stress-related and                                            | F70-F79 | 0   | 0   |
| 27 | somatoform disorders                                                    | F80-F89 | 0   | 0   |
| 28 | Behavioral syndromes associated                                         | F90-F98 | 0   | 0   |
| 29 | with physiological disturbances and                                     | F99     | 0   | 0   |
| 30 |                                                                         |         |     |     |
| 31 | <b>Neurologic disease</b>                                               | G00-G99 |     |     |
| 32 |                                                                         |         |     |     |
| 33 | Inflammatory diseases of the central nervous system                     | G00-G09 | 1   | 1   |
| 34 | Systemic atrophies primarily affecting the central nervous system       | G10-G14 | 4   | 3   |
| 35 | Extrapyramidal and movement disorders                                   | G20-G26 | 294 | 7   |
| 36 | Other degenerative diseases of the nervous system                       | G30-G32 | 22  | 51  |
| 37 | Demyelinating diseases of the central nervous system                    | G35-G37 | 0   | 0   |
| 38 | Episodic and paroxysmal disorders                                       | G40-G47 | 1   | 4   |
| 39 | Nerve, nerve root and plexus disorders                                  | G50-G59 | 0   | 0   |
| 40 | Polyneuropathies and other disorders of the peripheral nervous system   | G60-G64 | 0   | 1   |
| 41 | Diseases of myoneural junction and muscle                               | G70-G73 | 0   | 0   |
| 42 | Cerebral palsy and other paralytic syndromes                            | G80-G83 | 1   | 1   |
| 43 | Other disorders of the nervous system                                   | G90-G99 | 5   | 1   |
| 44 |                                                                         |         |     |     |
| 45 | <b>Circulatory disease</b>                                              | I00-I99 |     |     |
| 46 |                                                                         |         |     |     |
| 47 | Acute rheumatic fever                                                   | I00-I02 | 0   | 0   |
| 48 | Chronic rheumatic heart diseases                                        | I05-I09 | 0   | 3   |
| 49 | Hypertensive diseases                                                   | I10-I15 | 31  | 75  |
| 50 | Ischemic heart diseases                                                 | I20-I25 | 54  | 148 |
| 51 | Pulmonary heart disease and diseases of pulmonary circulation           | I26-I28 | 1   | 5   |
| 52 | Other forms of heart disease                                            | I30-I52 | 39  | 102 |
| 53 | Cerebrovascular diseases                                                | I60-I69 | 150 | 359 |
| 54 | Diseases of arteries, arterioles and capillaries                        | I70-I79 | 2   | 13  |
| 55 |                                                                         |         |     |     |
| 56 |                                                                         |         |     |     |
| 57 |                                                                         |         |     |     |
| 58 |                                                                         |         |     |     |
| 59 |                                                                         |         |     |     |
| 60 |                                                                         |         |     |     |

1  
2  
3  
4  
5  
6  
7  
8  
9  
10  
11  
12  
13  
14  
15  
16  
17  
18  
19  
20  
21  
22  
23  
24  
25  
26  
27  
28  
29  
30  
31  
32  
33  
34  
35  
36  
37  
38  
39  
40  
41  
42  
43  
44  
45  
46  
47  
48  
49  
50  
51  
52  
53  
54  
55  
56  
57  
58  
59  
60

|                                                                     |         |    |     |
|---------------------------------------------------------------------|---------|----|-----|
| Diseases of veins, lymphatic vessels and lymph nodes, NEC           | I80-I89 | 0  | 0   |
| Other and unspecified disorders of the circulatory system           | I95-I99 | 0  | 0   |
| <b>Respiratory disease</b>                                          | J00-J99 |    |     |
| Acute upper respiratory infections                                  | J00-J06 | 0  | 0   |
| Influenza and pneumonia                                             | J09-J18 | 48 | 105 |
| Other acute lower respiratory infections                            | J20-J22 | 0  | 0   |
| Other diseases of upper respiratory tract                           | J30-J39 | 0  | 0   |
| Chronic lower respiratory diseases                                  | J40-J47 | 31 | 106 |
| Lung diseases due to external agents                                | J60-J70 | 13 | 20  |
| Other respiratory diseases principally affecting the interstitium   | J80-J84 | 3  | 11  |
| Suppurative and necrotic conditions of lower respiratory tract      | J85-J86 | 1  | 1   |
| Other diseases of pleura                                            | J90-J94 | 0  | 0   |
| Other diseases of the respiratory system                            | J95-J99 | 1  | 5   |
| <b>Digestive disease</b>                                            | K00-K93 |    |     |
| Diseases of oral cavity, salivary glands and jaws                   | K00-K14 | 0  | 0   |
| Diseases of oesophagus, stomach and duodenum                        | K20-K31 | 3  | 12  |
| Disease of appendix                                                 | K35-K38 | 0  | 0   |
| Hernia                                                              | K40-K46 | 0  | 0   |
| Noninfective enteritis and colitis                                  | K50-K52 | 1  | 0   |
| Other diseases of intestines                                        | K55-K64 | 7  | 12  |
| Diseases of peritoneum                                              | K65-K67 | 0  | 2   |
| Diseases of liver                                                   | K70-K77 | 10 | 35  |
| Disorders of gallbladder, biliary tract and pancreas                | K80-K87 | 4  | 21  |
| Other diseases of the digestive system                              | K90-K93 | 5  | 6   |
| <b>Muscular disease</b>                                             | M00-M99 |    |     |
| Infectious arthropathies                                            | M00-M03 | 0  | 0   |
| Inflammatory polyarthropathies                                      | M05-M14 | 2  | 3   |
| Arthrosis                                                           | M15-M19 | 0  | 0   |
| Other joint disorders                                               | M20-M25 | 0  | 0   |
| Systemic connective tissue disorder                                 | M30-M36 | 0  | 1   |
| Deformin dorsopathies                                               | M40-M43 | 0  | 0   |
| Spondylopathies                                                     | M45-M49 | 1  | 0   |
| Other dorsopathies                                                  | M50-M54 | 0  | 1   |
| Disorders of muscles                                                | M60-M63 | 0  | 2   |
| Disorders of synovium and tendon                                    | M65-M68 | 0  | 0   |
| Other soft tissue disorders                                         | M70-M79 | 0  | 1   |
| Disorders of bone density and structure                             | M80-M85 | 5  | 6   |
| Other osteopathies                                                  | M86-M90 | 0  | 1   |
| Chondropathies                                                      | M91-M94 | 0  | 0   |
| Other disorders of the musculoskeletal system and connective tissue | M95-M99 | 0  | 0   |
| <b>Genitourinary disease</b>                                        | N00-N99 |    |     |
| Glomerular diseases                                                 | N00-N08 | 0  | 0   |
| Renal tubulo-interstitial diseases                                  | N10-N16 | 2  | 4   |
| Renal failure                                                       | N17-N19 | 18 | 38  |

|                                                                                                  |         |    |     |
|--------------------------------------------------------------------------------------------------|---------|----|-----|
| Urolithiasis                                                                                     | N20-N23 | 1  | 0   |
| Other disorders of kidney and ureter                                                             | N25-N29 | 0  | 0   |
| Other diseases of the urinary system                                                             | N30-N39 | 4  | 5   |
| Diseases of male genital organs                                                                  | N40-N51 | 0  | 3   |
| Disorders of breast                                                                              | N60-N64 | 0  | 0   |
| Inflammatory diseases of female pelvic organs                                                    | N70-N77 | 0  | 0   |
| Noninflammatory disorders of female genital tract                                                | N80-N98 | 0  | 0   |
| Other disorders of the genitourinary system                                                      | N99     | 0  | 0   |
| <b>Abnormal finding</b>                                                                          | R00-R99 |    |     |
| Symptoms and signs involving the circulatory and respiratory systems                             | R00-R09 | 9  | 15  |
| Symptoms and signs involving the digestive system and abdomen                                    | R10-R19 | 0  | 0   |
| Symptoms and signs involving the skin and subcutaneous tissue                                    | R20-R23 | 0  | 0   |
| symptoms and signs involving the nervous and musculoskeletal systems                             | R25-R29 | 0  | 0   |
| symptoms and signs involving the urinary system                                                  | R30-R39 | 0  | 0   |
| Symptoms and signs involving cognition, perception, emotional state and behaviour                | R40-R46 | 0  | 0   |
| Symptoms and signs involving speech and voice                                                    | R47-R49 | 0  | 0   |
| General symptoms and signs                                                                       | R50-R69 | 71 | 266 |
| Abnormal findings on examination of blood, without diagnosis                                     | R70-R79 | 0  | 0   |
| Abnormal findings on examination of urine, without diagnosis                                     | R80-R82 | 0  | 0   |
| Abnormal findings on examination of other body fluids, substances and tissues, without diagnosis | R83-R89 | 0  | 0   |
| Abnormal findings on diagnostic imaging and in function studies, without diagnosis               | R90-R94 | 0  | 0   |
| Ill-defined and unknown causes of mortality                                                      | R95-R99 | 5  | 48  |
| <b>Trauma</b>                                                                                    | S00-T98 |    |     |
| Injuries to the head                                                                             | S00-S09 | 10 | 32  |
| Injuries to the neck                                                                             | S10-S19 | 0  | 1   |
| Injuries to the thorax                                                                           | S20-S29 | 2  | 12  |
| Injuries to the abdomen, lower back, lumbar spine and pelvis                                     | S30-S39 | 0  | 3   |
| Injuries to the shoulder and upper arm                                                           | S40-S49 | 0  | 1   |
| Injuries to the elbow and forearm                                                                | S50-S59 | 1  | 0   |
| Injuries to the wrist and hand                                                                   | S60-S69 | 0  | 0   |
| Injuries to the hip and thigh                                                                    | S70-S79 | 7  | 16  |
| Injuries to the knee and lower leg                                                               | S80-S89 | 0  | 2   |
| Injuries to the ankle and foot                                                                   | S90-S99 | 0  | 0   |
| Injuries involving multiple body regions                                                         | T00-T07 | 7  | 17  |
| Injuries to unspecified part of trunk, limb or body region                                       | T08-T14 | 3  | 8   |
| Effects of foreign body entering through natural orifice                                         | T15-T19 | 6  | 2   |
| Burns and corrosions of external body surface, specified by site                                 | T20-T25 | 0  | 0   |
| Burn and corrosions confined to eye and internal organs                                          | T26-T28 | 0  | 1   |
| Burns and corrosions of multiple and unspecified of multiple and unspecified body regions        | T29-T32 | 2  | 0   |
| Frostbite                                                                                        | T33-T35 | 0  | 0   |

|                                                                                 |                     |    |    |
|---------------------------------------------------------------------------------|---------------------|----|----|
| Poisoning by drugs, medicaments and biological substances                       | T36-T50             | 1  | 1  |
| Toxic effects of substances chiefly nonmedicinal as to source                   | T51-T65             | 6  | 23 |
| Other and unspecified effects of external causes                                | T66-T78             | 18 | 33 |
| Certain early complications of trauma                                           | T79                 | 0  | 0  |
| Complications of surgical and medical care, NEC                                 | T80-T88             | 1  | 0  |
| Sequelae of injuries, of poisoning and of other consequences of external causes | T90-T98             | 0  | 2  |
| <b>Others</b>                                                                   | D50-D89,<br>L00-L99 |    |    |
| Nutritional anemias                                                             | D50-D53             | 0  | 0  |
| Hemolytic anemias                                                               | D55-D59             | 0  | 0  |
| Aplastic and other anemias                                                      | D60-D64             | 1  | 3  |
| Coagulation defect, purpura and other hemorrhage conditions                     | D65-D69             | 1  | 0  |
| Other disease of blood and blood-forming organs                                 | D70-D77             | 1  | 3  |
| Certain disorders involving the immune mechanism                                | D80-D89             | 0  | 2  |
| Other disorders of the skin and subcutaneous tissue                             | L80-L99             | 2  | 1  |
| missing                                                                         |                     | 12 | 2  |



STROBE Statement—Checklist of items that should be included in reports of *cohort studies*

|                              | Item No | Recommendation                                                                                                                                                                                    | Page No. |
|------------------------------|---------|---------------------------------------------------------------------------------------------------------------------------------------------------------------------------------------------------|----------|
| <b>Title and abstract</b>    | 1       | (a) Indicate the study's design with a commonly used term in the title or the abstract                                                                                                            | 1        |
|                              |         | (b) Provide in the abstract an informative and balanced summary of what was done and what was found                                                                                               | 3        |
| <b>Introduction</b>          |         |                                                                                                                                                                                                   |          |
| Background/<br>rationale     | 2       | Explain the scientific background and rationale for the investigation being reported                                                                                                              | 4–5      |
| Objectives                   | 3       | State specific objectives, including any prespecified hypotheses                                                                                                                                  | 5        |
| <b>Methods</b>               |         |                                                                                                                                                                                                   |          |
| Study design                 | 4       | Present key elements of study design early in the paper                                                                                                                                           | 6        |
| Setting                      | 5       | Describe the setting, locations, and relevant dates, including periods of recruitment, exposure, follow-up, and data collection                                                                   | 6        |
| Participants                 | 6       | (a) Give the eligibility criteria, and the sources and methods of selection of participants. Describe methods of follow-up                                                                        | 7        |
|                              |         | (b) For matched studies, give matching criteria and number of exposed and unexposed                                                                                                               | 7        |
| Variables                    | 7       | Clearly define all outcomes, exposures, predictors, potential confounders, and effect modifiers. Give diagnostic criteria, if applicable                                                          | 8        |
| Data sources/<br>measurement | 8*      | For each variable of interest, give sources of data and details of methods of assessment (measurement). Describe comparability of assessment methods if there is more than one group              | 8–9      |
| Bias                         | 9       | Describe any efforts to address potential sources of bias                                                                                                                                         | 9        |
| Study size                   | 10      | Explain how the study size was arrived at                                                                                                                                                         | N/A      |
| Quantitative<br>variables    | 11      | Explain how quantitative variables were handled in the analyses. If applicable, describe which groupings were chosen and why                                                                      | 9        |
| Statistical<br>methods       | 12      | (a) Describe all statistical methods, including those used to control for confounding                                                                                                             | 9        |
|                              |         | (b) Describe any methods used to examine subgroups and interactions                                                                                                                               | N/A      |
|                              |         | (c) Explain how missing data were addressed                                                                                                                                                       | N/A      |
|                              |         | (d) If applicable, explain how loss to follow-up was addressed                                                                                                                                    | N/A      |
|                              |         | (e) Describe any sensitivity analyses                                                                                                                                                             | N/A      |
| <b>Results</b>               |         |                                                                                                                                                                                                   |          |
| Participants                 | 13*     | (a) Report numbers of individuals at each stage of study—eg numbers potentially eligible, examined for eligibility, confirmed eligible, included in the study, completing follow-up, and analysed | 7        |
|                              |         | (b) Give reasons for non-participation at each stage                                                                                                                                              | N/A      |
|                              |         | (c) Consider use of a flow diagram                                                                                                                                                                | Fig. 1   |
| Descriptive data             | 14*     | (a) Give characteristics of study participants (eg demographic, clinical, social) and information on exposures and potential confounders                                                          | 10–11    |
|                              |         | (b) Indicate number of participants with missing data for each variable of interest                                                                                                               | N/A      |
|                              |         | (c) Summarise follow-up time (eg, average and total amount)                                                                                                                                       | 9        |
| Outcome data                 | 15*     | Report numbers of outcome events or summary measures over time                                                                                                                                    | 9–12     |
| Main results                 | 16      | (a) Give unadjusted estimates and, if applicable, confounder-adjusted estimates and their precision (eg, 95% confidence interval). Make clear which confounders                                   | 14–15    |

|                          |    |                                                                                                                                                                            |       |
|--------------------------|----|----------------------------------------------------------------------------------------------------------------------------------------------------------------------------|-------|
|                          |    | were adjusted for and why they were included                                                                                                                               |       |
|                          |    | (b) Report category boundaries when continuous variables were categorized                                                                                                  | N/A   |
|                          |    | (c) If relevant, consider translating estimates of relative risk into absolute risk for a meaningful time period                                                           | N/A   |
| Other analyses           | 17 | Report other analyses done—eg analyses of subgroups and interactions, and sensitivity analyses                                                                             | 11    |
| <b>Discussion</b>        |    |                                                                                                                                                                            |       |
| Key results              | 18 | Summarise key results with reference to study objectives                                                                                                                   | 16    |
| Limitations              | 19 | Discuss limitations of the study, taking into account sources of potential bias or imprecision. Discuss both direction and magnitude of any potential bias                 | 18–19 |
| Interpretation           | 20 | Give a cautious overall interpretation of results considering objectives, limitations, multiplicity of analyses, results from similar studies, and other relevant evidence | 19    |
| Generalisability         | 21 | Discuss the generalisability (external validity) of the study results                                                                                                      | N/A   |
| <b>Other information</b> |    |                                                                                                                                                                            |       |
| Funding                  | 22 | Give the source of funding and the role of the funders for the present study and, if applicable, for the original study on which the present article is based              | 19    |

\*Give information separately for exposed and unexposed groups.

**Note:** An Explanation and Elaboration article discusses each checklist item and gives methodological background and published examples of transparent reporting. The STROBE checklist is best used in conjunction with this article (freely available on the Web sites of PLoS Medicine at <http://www.plosmedicine.org/>, Annals of Internal Medicine at <http://www.annals.org/>, and Epidemiology at <http://www.epidem.com/>). Information on the STROBE Initiative is available at <http://www.strobe-statement.org>.
