# Supplementary material for: Mortality and cause of death in South Korean patients with Parkinson’s disease: a longitudinal follow-up study using a national sample cohort
Source: PubMed Central journal article supplement — BMJ Open. 2019 Sep 17;9(9):e029776. doi: 10.1136/bmjopen-2019-029776 (PMC6756321; doi:10.1136/bmjopen-2019-029776), 2019-09-17
Supplement: bmjopen-2019-029776supp001.pdf [file bmjopen-2019-029776supp001.pdf]

**S1Table** Cause of death in dementia and control group

| Cause of death                                                             | Codes    | Total participants       |                         |
|----------------------------------------------------------------------------|----------|--------------------------|-------------------------|
|                                                                            |          | Parkinson<br>(n = 3,510) | Control<br>(n = 14,040) |
| <b>Infection</b>                                                           | A00-B99  |                          |                         |
| Intestinal Infectious Diseases                                             | A00-A09  | 6                        | 9                       |
| Tuberculosis                                                               | A15-A19  | 3                        | 25                      |
| Certain Zoonotic Bacterial diseases                                        | A20-A28  | 0                        | 0                       |
| Other bacterial diseases                                                   | A30- A49 | 13                       | 26                      |
| Infections with a predominantly sexual mode of transmission                | A50-A64  | 0                        | 0                       |
| Other spirochaetal diseases                                                | A65-A69  | 0                        | 0                       |
| Other diseases caused by chlamydiae                                        | A70-A74  | 0                        | 0                       |
| Rickettsioses                                                              | A75-A79  | 0                        | 2                       |
| Viral infections of the central nervous system                             | A80-A89  | 0                        | 0                       |
| Arthropod-borne viral fevers and viral hemorrhagic fevers                  | A92-A99  | 0                        | 0                       |
| Viral infections characterized by skin and mucous membrane lesions         | B00-B09  | 0                        | 2                       |
| Viral hepatitis                                                            | B15-B19  | 1                        | 9                       |
| Human immunodeficiency virus[HIV] disease                                  | B20-B24  | 0                        | 0                       |
| Other viral diseases                                                       | B25-B34  | 0                        | 0                       |
| Mycoses                                                                    | B35-B49  | 0                        | 0                       |
| Protozoal diseases                                                         | B50-B64  | 0                        | 0                       |
| Helminthiases                                                              | B65-B83  | 0                        | 0                       |
| Pediculosis, acariasis and other infestations                              | B85-B89  | 0                        | 0                       |
| Sequelae of infectious and parasitic diseases                              | B90-B94  | 0                        | 1                       |
| Bacterial, viral and other infectious agents                               | B95-B98  | 0                        | 0                       |
| Other infectious diseases                                                  | B99      | 0                        | 0                       |
| <b>Neoplasm</b>                                                            | C00-D48  |                          |                         |
| Malignant neoplasm of lip, oral cavity and pharynx                         | C00-C14  | 5                        | 5                       |
| Malignant neoplasms of digestive organs                                    | C15-C26  | 67                       | 366                     |
| Malignant neoplasms of respiratory and intrathoracic organs                | C30-C39  | 28                       | 158                     |
| Malignant neoplasm of bone and articular cartilage                         | C40-C41  | 1                        | 2                       |
| Melanoma and other malignant neoplasms of skin                             | C43-C44  | 1                        | 1                       |
| Malignant neoplasms of mesothelial and soft tissue                         | C45-C49  | 1                        | 5                       |
| Malignant neoplasm of breast                                               | C50      | 2                        | 3                       |
| Malignant neoplasm of female genital organs                                | C51-C58  | 8                        | 11                      |
| Malignant neoplasm of male genital organs                                  | C60-C63  | 4                        | 29                      |
| Malignant neoplasm of urinary tract                                        | C64-C68  | 4                        | 28                      |
| Malignant neoplasm of eye, brain and other parts of central nervous system | C69-C72  | 1                        | 6                       |
| Malignant neoplasm of thyroid and other endocrine gland                    | C73-C75  | 3                        | 5                       |
| Malignant neoplasm of ill-defined, secondary and unspecified sites         | C76-C80  | 8                        | 11                      |
| Malignant neoplasms of lymphoid, hematopoietic and related tissue          | C81-C96  | 10                       | 26                      |
| Malignant neoplasm of independent (primary) multiple sites                 | C97      | 1                        | 2                       |
| In situ neoplasms                                                          | D00-D09  | 0                        | 1                       |

|                                                                         |         |     |     |
|-------------------------------------------------------------------------|---------|-----|-----|
| Benign neoplasms                                                        | D10-D36 | 1   | 2   |
| Neoplasms of uncertain or unknown behaviour                             | D37-D48 | 6   | 6   |
| <b>Metabolic disease</b>                                                | E00-E90 |     |     |
| Disorders of thyroid gland                                              | E00-E07 | 1   | 0   |
| Diabetes mellitus                                                       | E10-E14 | 71  | 154 |
| Other disorders of glucose regulation and pancreatic internal secretion | E15-E16 | 0   | 0   |
| Disorders of other endocrine glands                                     | E20-E35 | 2   | 0   |
| Malnutrition                                                            | E40-E46 | 0   | 1   |
| Other nutritional deficiencies                                          | E50-E64 | 1   | 0   |
| Obesity and other hyperalimentation                                     | E65-E68 | 0   | 0   |
| Metabolic disorders                                                     | E70-E90 | 1   | 6   |
| <b>Mental disease</b>                                                   | F00-F99 |     |     |
| Organic, including symptomatic<br>mental disorders                      | F00-F09 | 29  | 46  |
| Mental and behavioral disorders<br>due to psychoactive substance use    | F10-F19 | 2   | 3   |
| Schizophrenia, schizotypal and<br>delusional disorders                  | F20-F29 | 2   | 0   |
| Mood[ <i>affective</i> ] disorders                                      | F30-F39 | 0   | 0   |
| Neurotic, stress-related and<br>somatoform disorders                    | F40-F48 | 0   | 0   |
| Behavioral syndromes associated<br>with physiological disturbances and  | F50-F59 | 0   | 0   |
|                                                                         | F60-F69 | 0   | 0   |
|                                                                         | F70-F79 | 0   | 0   |
|                                                                         | F80-F89 | 0   | 0   |
|                                                                         | F90-F98 | 0   | 0   |
|                                                                         | F99     | 0   | 0   |
| <b>Neurologic disease</b>                                               | G00-G99 |     |     |
| Inflammatory diseases of the central nervous system                     | G00-G09 | 1   | 1   |
| Systemic atrophies primarily affecting the central nervous system       | G10-G14 | 4   | 3   |
| Extrapyramidal and movement disorders                                   | G20-G26 | 294 | 7   |
| Other degenerative diseases of the nervous system                       | G30-G32 | 22  | 51  |
| Demyelinating diseases of the central nervous system                    | G35-G37 | 0   | 0   |
| Episodic and paroxysmal disorders                                       | G40-G47 | 1   | 4   |
| Nerve, nerve root and plexus disorders                                  | G50-G59 | 0   | 0   |
| Polyneuropathies and other disorders of the peripheral nervous system   | G60-G64 | 0   | 1   |
| Diseases of myoneural junction and muscle                               | G70-G73 | 0   | 0   |
| Cerebral palsy and other paralytic syndromes                            | G80-G83 | 1   | 1   |
| Other disorders of the nervous system                                   | G90-G99 | 5   | 1   |
| <b>Circulatory disease</b>                                              | I00-I99 |     |     |
| Acute rheumatic fever                                                   | I00-I02 | 0   | 0   |
| Chronic rheumatic heart diseases                                        | I05-I09 | 0   | 3   |
| Hypertensive diseases                                                   | I10-I15 | 31  | 75  |
| Ischemic heart diseases                                                 | I20-I25 | 54  | 148 |
| Pulmonary heart disease and diseases of pulmonary circulation           | I26-I28 | 1   | 5   |
| Other forms of heart disease                                            | I30-I52 | 39  | 102 |
| Cerebrovascular diseases                                                | I60-I69 | 150 | 359 |
| Diseases of arteries, arterioles and capillaries                        | I70-I79 | 2   | 13  |

|                                                                     |         |    |     |
|---------------------------------------------------------------------|---------|----|-----|
| Diseases of veins, lymphatic vessels and lymph nodes, NEC           | I80-I89 | 0  | 0   |
| Other and unspecified disorders of the circulatory system           | I95-I99 | 0  | 0   |
| <b>Respiratory disease</b>                                          | J00-J99 |    |     |
| Acute upper respiratory infections                                  | J00-J06 | 0  | 0   |
| Influenza and pneumonia                                             | J09-J18 | 48 | 105 |
| Other acute lower respiratory infections                            | J20-J22 | 0  | 0   |
| Other diseases of upper respiratory tract                           | J30-J39 | 0  | 0   |
| Chronic lower respiratory diseases                                  | J40-J47 | 31 | 106 |
| Lung diseases due to external agents                                | J60-J70 | 13 | 20  |
| Other respiratory diseases principally affecting the interstitium   | J80-J84 | 3  | 11  |
| Suppurative and necrotic conditions of lower respiratory tract      | J85-J86 | 1  | 1   |
| Other diseases of pleura                                            | J90-J94 | 0  | 0   |
| Other diseases of the respiratory system                            | J95-J99 | 1  | 5   |
| <b>Digestive disease</b>                                            | K00-K93 |    |     |
| Diseases of oral cavity, salivary glands and jaws                   | K00-K14 | 0  | 0   |
| Diseases of oesophagus, stomach and duodenum                        | K20-K31 | 3  | 12  |
| Disease of appendix                                                 | K35-K38 | 0  | 0   |
| Hernia                                                              | K40-K46 | 0  | 0   |
| Noninfective enteritis and colitis                                  | K50-K52 | 1  | 0   |
| Other diseases of intestines                                        | K55-K64 | 7  | 12  |
| Diseases of peritoneum                                              | K65-K67 | 0  | 2   |
| Diseases of liver                                                   | K70-K77 | 10 | 35  |
| Disorders of gallbladder, biliary tract and pancreas                | K80-K87 | 4  | 21  |
| Other diseases of the digestive system                              | K90-K93 | 5  | 6   |
| <b>Muscular disease</b>                                             | M00-M99 |    |     |
| Infectious arthropathies                                            | M00-M03 | 0  | 0   |
| Inflammatory polyarthropathies                                      | M05-M14 | 2  | 3   |
| Arthrosis                                                           | M15-M19 | 0  | 0   |
| Other joint disorders                                               | M20-M25 | 0  | 0   |
| Systemic connective tissue disorder                                 | M30-M36 | 0  | 1   |
| Deformin dorsopathies                                               | M40-M43 | 0  | 0   |
| Spondylopathies                                                     | M45-M49 | 1  | 0   |
| Other dorsopathies                                                  | M50-M54 | 0  | 1   |
| Disorders of muscles                                                | M60-M63 | 0  | 2   |
| Disorders of synovium and tendon                                    | M65-M68 | 0  | 0   |
| Other soft tissue disorders                                         | M70-M79 | 0  | 1   |
| Disorders of bone density and structure                             | M80-M85 | 5  | 6   |
| Other osteopathies                                                  | M86-M90 | 0  | 1   |
| Chondropathies                                                      | M91-M94 | 0  | 0   |
| Other disorders of the musculoskeletal system and connective tissue | M95-M99 | 0  | 0   |
| <b>Genitourinary disease</b>                                        | N00-N99 |    |     |
| Glomerular diseases                                                 | N00-N08 | 0  | 0   |
| Renal tubulo-interstitial diseases                                  | N10-N16 | 2  | 4   |
| Renal failure                                                       | N17-N19 | 18 | 38  |

|                                                                                                  |         |    |     |
|--------------------------------------------------------------------------------------------------|---------|----|-----|
| Urolithiasis                                                                                     | N20-N23 | 1  | 0   |
| Other disorders of kidney and ureter                                                             | N25-N29 | 0  | 0   |
| Other diseases of the urinary system                                                             | N30-N39 | 4  | 5   |
| Diseases of male genital organs                                                                  | N40-N51 | 0  | 3   |
| Disorders of breast                                                                              | N60-N64 | 0  | 0   |
| Inflammatory diseases of female pelvic organs                                                    | N70-N77 | 0  | 0   |
| Noninflammatory disorders of female genital tract                                                | N80-N98 | 0  | 0   |
| Other disorders of the genitourinary system                                                      | N99     | 0  | 0   |
| <b>Abnormal finding</b>                                                                          | R00-R99 |    |     |
| Symptoms and signs involving the circulatory and respiratory systems                             | R00-R09 | 9  | 15  |
| Symptoms and signs involving the digestive system and abdomen                                    | R10-R19 | 0  | 0   |
| Symptoms and signs involving the skin and subcutaneous tissue                                    | R20-R23 | 0  | 0   |
| symptoms and signs involving the nervous and musculoskeletal systems                             | R25-R29 | 0  | 0   |
| symptoms and signs involving the urinary system                                                  | R30-R39 | 0  | 0   |
| Symptoms and signs involving cognition, perception, emotional state and behaviour                | R40-R46 | 0  | 0   |
| Symptoms and signs involving speech and voice                                                    | R47-R49 | 0  | 0   |
| General symptoms and signs                                                                       | R50-R69 | 71 | 266 |
| Abnormal findings on examination of blood, without diagnosis                                     | R70-R79 | 0  | 0   |
| Abnormal findings on examination of urine, without diagnosis                                     | R80-R82 | 0  | 0   |
| Abnormal findings on examination of other body fluids, substances and tissues, without diagnosis | R83-R89 | 0  | 0   |
| Abnormal findings on diagnostic imaging and in function studies, without diagnosis               | R90-R94 | 0  | 0   |
| Ill-defined and unknown causes of mortality                                                      | R95-R99 | 5  | 48  |
| <b>Trauma</b>                                                                                    | S00-T98 |    |     |
| Injuries to the head                                                                             | S00-S09 | 10 | 32  |
| Injuries to the neck                                                                             | S10-S19 | 0  | 1   |
| Injuries to the thorax                                                                           | S20-S29 | 2  | 12  |
| Injuries to the abdomen, lower back, lumbar spine and pelvis                                     | S30-S39 | 0  | 3   |
| Injuries to the shoulder and upper arm                                                           | S40-S49 | 0  | 1   |
| Injuries to the elbow and forearm                                                                | S50-S59 | 1  | 0   |
| Injuries to the wrist and hand                                                                   | S60-S69 | 0  | 0   |
| Injuries to the hip and thigh                                                                    | S70-S79 | 7  | 16  |
| Injuries to the knee and lower leg                                                               | S80-S89 | 0  | 2   |
| Injuries to the ankle and foot                                                                   | S90-S99 | 0  | 0   |
| Injuries involving multiple body regions                                                         | T00-T07 | 7  | 17  |
| Injuries to unspecified part of trunk, limb or body region                                       | T08-T14 | 3  | 8   |
| Effects of foreign body entering through natural orifice                                         | T15-T19 | 6  | 2   |
| Burns and corrosions of external body surface, specified by site                                 | T20-T25 | 0  | 0   |
| Burn and corrosions confined to eye and internal organs                                          | T26-T28 | 0  | 1   |
| Burns and corrosions of multiple and unspecified of multiple and unspecified body regions        | T29-T32 | 2  | 0   |
| Frostbite                                                                                        | T33-T35 | 0  | 0   |

|                                                                                 |                     |    |    |
|---------------------------------------------------------------------------------|---------------------|----|----|
| Poisoning by drugs, medicaments and biological substances                       | T36-T50             | 1  | 1  |
| Toxic effects of substances chiefly nonmedicinal as to source                   | T51-T65             | 6  | 23 |
| Other and unspecified effects of external causes                                | T66-T78             | 18 | 33 |
| Certain early complications of trauma                                           | T79                 | 0  | 0  |
| Complications of surgical and medical care, NEC                                 | T80-T88             | 1  | 0  |
| Sequelae of injuries, of poisoning and of other consequences of external causes | T90-T98             | 0  | 2  |
| <b>Others</b>                                                                   | D50-D89,<br>L00-L99 |    |    |
| Nutritional anemias                                                             | D50-D53             | 0  | 0  |
| Hemolytic anemias                                                               | D55-D59             | 0  | 0  |
| Aplastic and other anemias                                                      | D60-D64             | 1  | 3  |
| Coagulation defect, purpura and other hemorrhage conditions                     | D65-D69             | 1  | 0  |
| Other disease of blood and blood-forming organs                                 | D70-D77             | 1  | 3  |
| Certain disorders involving the immune mechanism                                | D80-D89             | 0  | 2  |
| Other disorders of the skin and subcutaneous tissue                             | L80-L99             | 2  | 1  |
| missing                                                                         |                     | 12 | 2  |
